# Supplementary material
Source: PubMed Central journal article supplement (PMC3288202)
Supplement: NIHMS345582-supplement-1.pdf [file NIHMS345582-supplement-1.pdf]

# SUPPLEMENTAL MATERIAL

## **A large candidate gene survey identifies the *KCNE1* D85N polymorphism as a possible modulator of drug-induced torsades de pointes**

Stefan Kääh, MD, PhD\*, Dana C. Crawford, PhD\*, Moritz F. Sinner, MD\*, Elijah R. Behr, MD\*, Prince J. Kannankeril, MD, Arthur A. M. Wilde, MD, PhD, Connie R. Bezzina, PhD, Eric Schulze-Bahr, MD, Pascale Guicheney, PhD, Nanette H. Bishopric, MD, Robert J. Myerburg, MD, Jean-Jacques Schott, PhD, Arne Pfeufer, MD, MSc, Britt-Maria Beckmann, MD, Eimo Martens, MD, Taifang Zhang, PhD, Birgit Stallmeyer, PhD, Sven Zumhagen, MD, Isabelle Denjoy, MD, Abdennasser Bardai, MD, Isabelle van Gelder, MD, Yalda Jamshidi, MD, Chrysoula Dalageorgou, BSc, Vanessa Marshall, MD, Steve Jeffery, PhD, Saad Shakir, FRCP, A. John Camm, MD, Gerhard Steinbeck, MD, Siegfried Perz, MSc, Peter Lichtner, PhD, Thomas Meitinger, MD, Annette Peters, MSc, PhD, H.-Erich Wichmann, MD, PhD, Christie Ingram, Yuki Bradford, MS, Shannon Carter, RN, Kris Norris, RN, Marylyn D. Ritchie, PhD, Alfred L. George Jr, MD, Dan M. Roden, MD

\*These authors contributed equally to the study

Supplemental Table 1

| SNP        | chromosome | position  | closest gene | Role       | non-synonymous SNP | Call rate (%) | HWE p-value | Major allele | Minor allele | diLQT vs. controls |                          | diLQT vs. KORA     |                          |
|------------|------------|-----------|--------------|------------|--------------------|---------------|-------------|--------------|--------------|--------------------|--------------------------|--------------------|--------------------------|
|            |            |           |              |            |                    |               |             |              |              | OR (95% CI)        | p-value                  | OR (95% CI)        | p-value                  |
| rs4564142  | 1          | 115841013 | CASQ2        |            |                    | 0.98          | 8.59E-01    | C            | T            | 1.18 (0.78 - 1.80) | 4.38 X 10 <sup>-01</sup> | 1.70 (1.21 - 2.38) | 2.22 X 10 <sup>-03</sup> |
| rs3860222  | 1          | 115848852 | CASQ2        |            |                    | 0.98          | 8.37E-03    | A            | G            | 1.15 (0.80 - 1.67) | 4.50 X 10 <sup>-01</sup> | 1.63 (1.20 - 2.22) | 1.98 X 10 <sup>-03</sup> |
| rs3935830  | 1          | 115849068 | CASQ2        |            |                    | 0.99          | 8.50E-02    | A            | G            | 1.19 (0.71 - 1.99) | 5.00 X 10 <sup>-01</sup> | 1.66 (1.10 - 2.51) | 1.64 X 10 <sup>-02</sup> |
| rs6672017  | 1          | 115868697 | CASQ2        |            |                    | 0.98          | 2.01E-02    | A            | G            | 1.01 (0.68 - 1.50) | 9.62 X 10 <sup>-01</sup> | 1.51 (1.09 - 2.08) | 1.27 X 10 <sup>-02</sup> |
| rs4240548  | 1          | 115882469 | CASQ2        |            |                    | 0.99          | 7.30E-02    | C            | T            | 1.19 (0.75 - 1.89) | 4.51 X 10 <sup>-01</sup> | 0.91 (0.63 - 1.33) | 6.39 X 10 <sup>-01</sup> |
| rs4603135  | 1          | 115883425 | CASQ2        |            |                    | 0.98          | 6.19E-01    | C            | T            | 1.18 (0.83 - 1.68) | 3.55 X 10 <sup>-01</sup> | 1.31 (0.98 - 1.75) | 6.50 X 10 <sup>-02</sup> |
| rs3010379  | 1          | 115898217 | CASQ2        | Intron     |                    | 0.97          | 5.78E-01    | A            | G            | 1.21 (0.84 - 1.75) | 3.04 X 10 <sup>-01</sup> | 1.31 (0.97 - 1.77) | 7.58 X 10 <sup>-02</sup> |
| rs3010382  | 1          | 115909652 | CASQ2        | Intron     |                    | 0.99          | 4.15E-01    | A            | G            | 0.86 (0.62 - 1.21) | 3.91 X 10 <sup>-01</sup> | 1.11 (0.85 - 1.45) | 4.58 X 10 <sup>-01</sup> |
| rs10801911 | 1          | 115915906 | CASQ2        | Intron     |                    | 0.98          | 2.40E-01    | A            | G            | 1.20 (0.75 - 1.93) | 4.46 X 10 <sup>-01</sup> | 1.11 (0.76 - 1.61) | 5.97 X 10 <sup>-01</sup> |
| rs10923142 | 1          | 115916703 | CASQ2        | Intron     |                    | 0.98          | 5.62E-01    | C            | T            | 0.85 (0.58 - 1.26) | 4.17 X 10 <sup>-01</sup> | 0.97 (0.69 - 1.37) | 8.68 X 10 <sup>-01</sup> |
| rs10923143 | 1          | 115916849 | CASQ2        | Intron     |                    | 0.98          | 6.45E-03    | A            | G            | 1.27 (0.89 - 1.81) | 1.83 X 10 <sup>-01</sup> | 1.11 (0.83 - 1.49) | 4.72 X 10 <sup>-01</sup> |
| rs7540389  | 1          | 115917063 | CASQ2        | Intron     |                    | 0.98          | 3.72E-01    | A            | G            | 0.85 (0.60 - 1.21) | 3.80 X 10 <sup>-01</sup> | 0.89 (0.67 - 1.19) | 4.37 X 10 <sup>-01</sup> |
| rs4428890  | 1          | 115917890 | CASQ2        | Intron     |                    | 0.99          | 7.11E-01    | A            | G            | 0.92 (0.55 - 1.54) | 7.46 X 10 <sup>-01</sup> | 1.00 (0.65 - 1.53) | 9.90 X 10 <sup>-01</sup> |
| rs4839469  | 1          | 115918465 | CASQ2        | Exon       |                    | 0.99          | 1.48E-01    | A            | G            | 0.85 (0.52 - 1.41) | 5.32 X 10 <sup>-01</sup> | 0.87 (0.59 - 1.30) | 5.02 X 10 <sup>-01</sup> |
| rs12039617 | 1          | 115919526 | CASQ2        | Intron     |                    | 0.98          | 2.50E-01    | C            | T            | 0.98 (0.67 - 1.43) | 9.03 X 10 <sup>-01</sup> | 0.98 (0.71 - 1.35) | 9.03 X 10 <sup>-01</sup> |
| rs4440851  | 1          | 115920639 | CASQ2        | Intron     |                    | 0.98          | 6.14E-01    | G            | T            | 1.16 (0.84 - 1.60) | 3.75 X 10 <sup>-01</sup> | 1.00 (0.77 - 1.30) | 9.99 X 10 <sup>-01</sup> |
| rs12133715 | 1          | 115920640 | CASQ2        | Intron     |                    | 0.97          | 3.45E-03    | A            | G            | 1.16 (0.83 - 1.63) | 3.91 X 10 <sup>-01</sup> | 0.99 (0.75 - 1.31) | 9.69 X 10 <sup>-01</sup> |
| rs4433392  | 1          | 115921751 | CASQ2        | Intron     |                    | 0.98          | 4.63E-01    | C            | T            | 0.97 (0.70 - 1.34) | 8.59 X 10 <sup>-01</sup> | 1.02 (0.78 - 1.33) | 8.95 X 10 <sup>-01</sup> |
| rs12134884 | 1          | 115921899 | CASQ2        | Intron     |                    | 0.96          | 6.93E-01    | A            | G            | 1.05 (0.76 - 1.43) | 7.85 X 10 <sup>-01</sup> | 0.93 (0.72 - 1.22) | 6.11 X 10 <sup>-01</sup> |
| rs17500488 | 1          | 115923805 | CASQ2        | Intron     |                    | 0.98          | 4.51E-01    | C            | T            | 0.90 (0.52 - 1.54) | 6.99 X 10 <sup>-01</sup> | 1.17 (0.75 - 1.83) | 4.82 X 10 <sup>-01</sup> |
| rs10923153 | 1          | 115925951 | CASQ2        | Intron     |                    | 0.97          | 9.58E-01    | G            | T            | 1.18 (0.83 - 1.68) | 3.45 X 10 <sup>-01</sup> | 0.93 (0.71 - 1.23) | 6.13 X 10 <sup>-01</sup> |
| rs10801913 | 1          | 115926321 | CASQ2        | Intron     |                    | 0.99          | 4.50E-01    | A            | G            | 0.99 (0.72 - 1.38) | 9.72 X 10 <sup>-01</sup> | 1.17 (0.89 - 1.53) | 2.69 X 10 <sup>-01</sup> |
| rs10923156 | 1          | 115931365 | CASQ2        | Intron     |                    | 0.98          | 9.97E-02    | A            | G            | 0.84 (0.58 - 1.22) | 3.60 X 10 <sup>-01</sup> | 0.94 (0.70 - 1.28) | 7.03 X 10 <sup>-01</sup> |
| rs6671952  | 1          | 115932400 | CASQ2        | Intron     |                    | 0.99          | 7.44E-01    | C            | G            | 1.22 (0.86 - 1.72) | 2.76 X 10 <sup>-01</sup> | 0.89 (0.67 - 1.19) | 4.36 X 10 <sup>-01</sup> |
| rs4571967  | 1          | 115932493 | CASQ2        | Intron     |                    | 0.98          | 8.57E-01    | G            | T            | 0.92 (0.65 - 1.32) | 6.51 X 10 <sup>-01</sup> | 0.99 (0.74 - 1.33) | 9.62 X 10 <sup>-01</sup> |
| rs10923168 | 1          | 115935012 | CASQ2        | Intron     |                    | 0.98          | 8.62E-01    | C            | T            | 0.83 (0.59 - 1.18) | 3.02 X 10 <sup>-01</sup> | 0.94 (0.71 - 1.25) | 6.58 X 10 <sup>-01</sup> |
| rs6699583  | 1          | 115935348 | CASQ2        | Intron     |                    | 0.98          | 5.17E-01    | G            | T            | 0.94 (0.67 - 1.31) | 7.12 X 10 <sup>-01</sup> | 1.14 (0.86 - 1.49) | 3.59 X 10 <sup>-01</sup> |
| rs12145661 | 1          | 115940262 | CASQ2        | Intron     |                    | 0.98          | 8.04E-01    | C            | T            | 0.86 (0.62 - 1.19) | 3.53 X 10 <sup>-01</sup> | 1.06 (0.82 - 1.39) | 6.42 X 10 <sup>-01</sup> |
| rs12402914 | 1          | 115945452 | CASQ2        | Intron     |                    | 0.99          | 7.70E-01    | C            | T            | 1.22 (0.82 - 1.82) | 3.28 X 10 <sup>-01</sup> | 1.03 (0.75 - 1.41) | 8.67 X 10 <sup>-01</sup> |
| rs17034230 | 1          | 115951308 | CASQ2        | 3'UTR      |                    | 0.99          | 2.20E-01    | A            | C            | 0.93 (0.58 - 1.48) | 7.56 X 10 <sup>-01</sup> | 1.00 (0.68 - 1.48) | 9.92 X 10 <sup>-01</sup> |
| rs10494179 | 1          | 115951410 | CASQ2        | 3'UTR      |                    | 0.97          | 8.74E-01    | C            | G            | 1.04 (0.74 - 1.47) | 8.11 X 10 <sup>-01</sup> | 1.00 (0.77 - 1.31) | 9.90 X 10 <sup>-01</sup> |
| rs4348723  | 1          | 115951675 | CASQ2        | 3'UTR      |                    | 0.98          | 4.94E-01    | G            | T            | 1.17 (0.78 - 1.75) | 4.44 X 10 <sup>-01</sup> | 0.99 (0.72 - 1.37) | 9.71 X 10 <sup>-01</sup> |
| rs3811007  | 1          | 115952241 | CASQ2        | 3'UTR      |                    | 0.94          | 9.54E-14    | A            | T            | 0.90 (0.58 - 1.38) | 6.20 X 10 <sup>-01</sup> | 1.07 (0.76 - 1.50) | 7.06 X 10 <sup>-01</sup> |
| rs17034260 | 1          | 115957192 | CASQ2        | Intron     |                    | 0.98          | 3.29E-01    | C            | T            | 1.20 (0.85 - 1.70) | 3.04 X 10 <sup>-01</sup> | 1.10 (0.83 - 1.45) | 5.03 X 10 <sup>-01</sup> |
| rs7536370  | 1          | 115961145 | CASQ2        | Intron     |                    | 0.96          | 4.35E-01    | A            | C            | 1.00 (0.71 - 1.41) | 9.87 X 10 <sup>-01</sup> | 0.96 (0.71 - 1.28) | 7.67 X 10 <sup>-01</sup> |
| rs6684209  | 1          | 115962654 | CASQ2        | Intron     |                    | 0.98          | 5.04E-01    | C            | T            | 1.14 (0.74 - 1.75) | 5.54 X 10 <sup>-01</sup> | 1.13 (0.79 - 1.62) | 5.02 X 10 <sup>-01</sup> |
| rs7355132  | 1          | 115976796 | CASQ2        | Intron     |                    | 0.99          | 6.44E-01    | A            | C            | 1.10 (0.75 - 1.61) | 6.28 X 10 <sup>-01</sup> | 0.96 (0.70 - 1.31) | 7.89 X 10 <sup>-01</sup> |
| rs3010396  | 1          | 115985830 | CASQ2        | Intron     |                    | 0.98          | 4.06E-01    | A            | G            | 0.85 (0.62 - 1.17) | 3.28 X 10 <sup>-01</sup> | 0.92 (0.71 - 1.19) | 5.14 X 10 <sup>-01</sup> |
| rs4255385  | 1          | 115986374 | CASQ2        | Intron     |                    | 0.99          | 3.50E-01    | C            | T            | 1.11 (0.67 - 1.84) | 6.81 X 10 <sup>-01</sup> | 0.90 (0.59 - 1.38) | 6.30 X 10 <sup>-01</sup> |
| rs10754345 | 1          | 115987194 | CASQ2        | Intron     |                    | 0.98          | 2.14E-01    | A            | G            | 1.19 (0.84 - 1.68) | 3.37 X 10 <sup>-01</sup> | 1.07 (0.81 - 1.43) | 6.37 X 10 <sup>-01</sup> |
| rs6677074  | 1          | 115990545 | CASQ2        | Intron     |                    | 0.97          | 5.50E-01    | A            | C            | 1.24 (0.89 - 1.72) | 1.99 X 10 <sup>-01</sup> | 1.11 (0.85 - 1.46) | 4.31 X 10 <sup>-01</sup> |
| rs9428216  | 1          | 116003651 | CASQ2        | Intron     |                    | 0.98          | 5.38E-02    | C            | T            | 1.25 (0.91 - 1.72) | 1.75 X 10 <sup>-01</sup> | 1.16 (0.90 - 1.50) | 2.62 X 10 <sup>-01</sup> |
| rs9428087  | 1          | 116013607 | CASQ2        | Intron     |                    | 0.98          | 3.32E-01    | A            | G            | 0.87 (0.63 - 1.20) | 4.04 X 10 <sup>-01</sup> | 0.95 (0.73 - 1.24) | 7.10 X 10 <sup>-01</sup> |
| rs4240550  | 1          | 116017513 | CASQ2        | Intron     |                    | 0.98          | 4.40E-02    | G            | T            | 1.15 (0.83 - 1.59) | 4.02 X 10 <sup>-01</sup> | 1.12 (0.85 - 1.46) | 4.16 X 10 <sup>-01</sup> |
| rs4074536  | 1          | 116023009 | CASQ2        | Exon       | T66A               | 0.97          | 8.18E-01    | C            | T            | 1.23 (0.86 - 1.74) | 2.61 X 10 <sup>-01</sup> | 1.23 (0.93 - 1.64) | 1.49 X 10 <sup>-01</sup> |
| rs10923440 | 1          | 116029483 | CASQ2        | Promoter   |                    | 0.98          | 3.56E-01    | A            | G            | 1.17 (0.81 - 1.71) | 4.01 X 10 <sup>-01</sup> | 1.05 (0.77 - 1.42) | 7.60 X 10 <sup>-01</sup> |
| rs4839484  | 1          | 116037579 | CASQ2        |            |                    | 0.98          | 6.26E-01    | A            | G            | 1.15 (0.84 - 1.59) | 3.85 X 10 <sup>-01</sup> | 0.99 (0.76 - 1.28) | 9.15 X 10 <sup>-01</sup> |
| rs6428719  | 1          | 116042600 | CASQ2        |            |                    | 0.97          | 6.52E-01    | A            | T            | 1.41 (0.85 - 2.33) | 1.79 X 10 <sup>-01</sup> | 1.14 (0.77 - 1.71) | 5.11 X 10 <sup>-01</sup> |
| rs4279854  | 1          | 116046636 | CASQ2        |            |                    | 0.98          | 5.18E-01    | A            | C            | 1.14 (0.80 - 1.62) | 4.75 X 10 <sup>-01</sup> | 1.02 (0.76 - 1.35) | 9.21 X 10 <sup>-01</sup> |
| rs4072906  | 1          | 116048993 | CASQ2        |            |                    | 0.99          | 4.84E-01    | A            | T            | 1.42 (0.86 - 2.34) | 1.73 X 10 <sup>-01</sup> | 1.18 (0.80 - 1.75) | 4.05 X 10 <sup>-01</sup> |
| rs4839485  | 1          | 116049706 | CASQ2        |            |                    | 0.99          | 3.58E-01    | A            | G            | 1.19 (0.86 - 1.65) | 3.01 X 10 <sup>-01</sup> | 1.04 (0.80 - 1.35) | 7.77 X 10 <sup>-01</sup> |
| rs4483405  | 1          | 116051311 | CASQ2        |            |                    | 0.99          | 6.52E-01    | G            | T            | 1.25 (0.89 - 1.76) | 1.89 X 10 <sup>-01</sup> | 1.19 (0.91 - 1.56) | 1.95 X 10 <sup>-01</sup> |
| rs7523715  | 1          | 116052302 | CASQ2        |            |                    | 0.97          | 7.62E-01    | A            | T            | 1.31 (0.94 - 1.82) | 1.15 X 10 <sup>-01</sup> | 0.94 (0.72 - 1.23) | 6.60 X 10 <sup>-01</sup> |
| rs4839488  | 1          | 116054809 | CASQ2        |            |                    | 0.97          | 5.82E-01    | C            | T            | 1.20 (0.85 - 1.70) | 2.91 X 10 <sup>-01</sup> | 1.00 (0.76 - 1.33) | 9.84 X 10 <sup>-01</sup> |
| rs1342714  | 1          | 116074023 | CASQ2        |            |                    | 0.98          | 9.23E-01    | C            | T            | 1.05 (0.77 - 1.47) | 7.10 X 10 <sup>-01</sup> | 0.98 (0.76 - 1.27) | 8.89 X 10 <sup>-01</sup> |
| rs10399824 | 1          | 116083878 | CASQ2        | Downstream |                    | 0.98          | 7.37E-01    | A            | G            | 1.13 (0.58 - 2.21) | 7.18 X 10 <sup>-01</sup> | 0.76 (0.46 - 1.27) | 2.95 X 10 <sup>-01</sup> |
| rs12029349 | 1          | 116084134 | CASQ2        | Downstream |                    | 0.98          | 9.52E-01    | A            | C            | 1.26 (0.87 - 1.84) | 2.25 X 10 <sup>-01</sup> | 0.92 (0.68 - 1.23) | 5.64 X 10 <sup>-01</sup> |
| rs12030658 | 1          | 116100653 | CASQ2        | Promoter   |                    | 0.98          | 7.49E-01    | C            | T            | 1.17 (0.83 - 1.64) | 3.75 X 10 <sup>-01</sup> | 0.92 (0.70 - 1.21) | 5.67 X 10 <sup>-01</sup> |
| rs6682391  | 1          | 116102814 | CASQ2        | Promoter   |                    | 0.99          | 7.24E-01    | C            | T            | 1.48 (0.99 - 2.21) | 5.52 X 10 <sup>-02</sup> | 1.08 (0.79 - 1.48) | 6.15 X 10 <sup>-01</sup> |
| rs2811575  | 1          | 116104510 | CASQ2        | Promoter   |                    | 0.96          | 4.59E-01    | C            | G            | 1.24 (0.88 - 1.74) | 2.12 X 10 <sup>-01</sup> | 0.96 (0.73 - 1.26) | 7.46 X 10 <sup>-01</sup> |
| rs1935778  | 1          | 116106741 | CASQ2        |            |                    | 0.98          | 7.33E-01    | A            | G            | 1.16 (0.84 - 1.60) | 3.80 X 10 <sup>-01</sup> | 0.89 (0.69 - 1.16) | 4.02 X 10 <sup>-01</sup> |

|            |   |           |       |            |      |          |   |   |                    |                          |                    |                          |
|------------|---|-----------|-------|------------|------|----------|---|---|--------------------|--------------------------|--------------------|--------------------------|
| rs2096210  | 1 | 116113436 | CASQ2 |            | 0.96 | 9.29E-01 | C | T | 1.53 (0.95 - 2.48) | 8.36 X 10 <sup>-02</sup> | 0.94 (0.67 - 1.32) | 7.14 X 10 <sup>-01</sup> |
| rs1498116  | 1 | 116116838 | CASQ2 |            | 0.97 | 5.13E-01 | A | G | 0.97 (0.69 - 1.36) | 8.49 X 10 <sup>-01</sup> | 0.87 (0.66 - 1.16) | 3.49 X 10 <sup>-01</sup> |
| rs10923675 | 1 | 116120616 | CASQ2 |            | 0.98 | 5.03E-10 | A | G | 0.94 (0.54 - 1.61) | 8.09 X 10 <sup>-01</sup> | 1.39 (0.87 - 2.24) | 1.72 X 10 <sup>-01</sup> |
| rs11586273 | 1 | 116123992 | CASQ2 |            | 0.98 | 5.86E-01 | A | G | 0.94 (0.67 - 1.34) | 7.39 X 10 <sup>-01</sup> | 0.93 (0.70 - 1.23) | 5.90 X 10 <sup>-01</sup> |
| rs4839498  | 1 | 116124603 | CASQ2 |            | 0.98 | 2.38E-01 | C | T | 0.89 (0.63 - 1.26) | 5.10 X 10 <sup>-01</sup> | 1.00 (0.76 - 1.30) | 9.82 X 10 <sup>-01</sup> |
| rs7366407  | 1 | 116129945 | CASQ2 |            | 0.99 | 6.84E-01 | A | T | 0.96 (0.68 - 1.37) | 8.37 X 10 <sup>-01</sup> | 1.01 (0.76 - 1.34) | 9.53 X 10 <sup>-01</sup> |
| rs10918342 | 1 | 158682109 | CAPON | Downstream | 0.99 | 1.06E-02 | A | G | 1.07 (0.77 - 1.48) | 6.92 X 10 <sup>-01</sup> | 1.16 (0.89 - 1.52) | 2.72 X 10 <sup>-01</sup> |
| rs10918361 | 1 | 158684405 | CAPON | Downstream | 0.97 | 9.76E-02 | A | G | 1.23 (0.85 - 1.77) | 2.80 X 10 <sup>-01</sup> | 1.23 (0.92 - 1.66) | 1.60 X 10 <sup>-01</sup> |
| rs12726227 | 1 | 158686106 | CAPON | Intron     | 0.99 | 7.26E-01 | C | T | 1.11 (0.79 - 1.55) | 5.53 X 10 <sup>-01</sup> | 1.26 (0.96 - 1.66) | 9.60 X 10 <sup>-02</sup> |
| rs2490423  | 1 | 158687314 | CAPON | Intron     | 0.99 | 2.98E-01 | C | T | 1.20 (0.70 - 2.05) | 5.14 X 10 <sup>-01</sup> | 1.06 (0.70 - 1.61) | 7.83 X 10 <sup>-01</sup> |
| rs7531820  | 1 | 158694818 | CAPON | Intron     | 0.99 | 1.00E+00 | A | C | 1.16 (0.73 - 1.82) | 5.33 X 10 <sup>-01</sup> | 1.20 (0.83 - 1.72) | 3.39 X 10 <sup>-01</sup> |
| rs2341467  | 1 | 158696857 | CAPON | Intron     | 0.98 | 7.56E-01 | C | T | 1.36 (0.90 - 2.04) | 1.45 X 10 <sup>-01</sup> | 1.35 (0.96 - 1.89) | 8.26 X 10 <sup>-02</sup> |
| rs2499836  | 1 | 158699339 | CAPON | Exon       | 0.99 | 2.65E-01 | C | T | 1.34 (0.93 - 1.93) | 1.21 X 10 <sup>-01</sup> | 1.27 (0.95 - 1.68) | 1.03 X 10 <sup>-01</sup> |
| rs2247075  | 1 | 158700482 | CAPON | Intron     | 0.98 | 7.97E-01 | A | G | 1.29 (0.85 - 1.98) | 2.36 X 10 <sup>-01</sup> | 1.27 (0.90 - 1.78) | 1.70 X 10 <sup>-01</sup> |
| rs7527826  | 1 | 158700980 | CAPON | Intron     | 0.92 | 3.91E-10 | A | G | 1.01 (0.75 - 1.36) | 9.44 X 10 <sup>-01</sup> | 1.20 (0.94 - 1.54) | 1.38 X 10 <sup>-01</sup> |
| rs1806532  | 1 | 158703885 | CAPON | Intron     | 0.96 | 6.41E-01 | C | G | 1.06 (0.71 - 1.58) | 7.86 X 10 <sup>-01</sup> | 1.02 (0.73 - 1.40) | 9.30 X 10 <sup>-01</sup> |
| rs4348701  | 1 | 158705068 | CAPON | Intron     | 0.99 | 6.38E-01 | A | G | 1.14 (0.65 - 1.99) | 6.59 X 10 <sup>-01</sup> | 1.34 (0.85 - 2.09) | 2.05 X 10 <sup>-01</sup> |
| rs2490422  | 1 | 158706242 | CAPON | Intron     | 0.99 | 5.76E-01 | A | G | 1.08 (0.70 - 1.68) | 7.22 X 10 <sup>-01</sup> | 0.96 (0.68 - 1.34) | 7.95 X 10 <sup>-01</sup> |
| rs11812028 | 1 | 158706299 | CAPON | Intron     | 0.97 | 3.46E-01 | A | T | 1.18 (0.84 - 1.66) | 3.32 X 10 <sup>-01</sup> | 1.10 (0.83 - 1.45) | 5.15 X 10 <sup>-01</sup> |
| rs7522269  | 1 | 158706939 | CAPON | Intron     | 0.98 | 2.07E-01 | C | T | 1.16 (0.80 - 1.66) | 4.38 X 10 <sup>-01</sup> | 1.60 (1.17 - 2.20) | 3.67 X 10 <sup>-03</sup> |
| rs12022536 | 1 | 158707892 | CAPON | Exon       | 0.99 | 5.26E-01 | A | G | 1.24 (0.82 - 1.87) | 3.15 X 10 <sup>-01</sup> | 1.27 (0.91 - 1.77) | 1.58 X 10 <sup>-01</sup> |
| rs12120347 | 1 | 158709416 | CAPON | Intron     | 0.99 | 2.33E-01 | A | T | 1.50 (0.97 - 2.33) | 6.91 X 10 <sup>-02</sup> | 1.24 (0.89 - 1.75) | 2.09 X 10 <sup>-01</sup> |
| rs6676438  | 1 | 158714747 | CAPON | Intron     | 0.98 | 4.67E-03 | C | T | 1.16 (0.83 - 1.63) | 3.86 X 10 <sup>-01</sup> | 1.21 (0.92 - 1.61) | 1.78 X 10 <sup>-01</sup> |
| rs12026931 | 1 | 158716193 | CAPON | Intron     | 0.98 | 2.49E-01 | C | T | 2.36 (1.25 - 4.45) | 8.09 X 10 <sup>-03</sup> | 1.28 (0.81 - 2.02) | 2.96 X 10 <sup>-01</sup> |
| rs7532680  | 1 | 158719864 | CAPON | Intron     | 0.99 | 3.95E-02 | C | T | 0.78 (0.54 - 1.12) | 1.79 X 10 <sup>-01</sup> | 1.09 (0.79 - 1.51) | 5.90 X 10 <sup>-01</sup> |
| rs4656347  | 1 | 158727720 | CAPON | Promoter   | 0.98 | 4.40E-03 | C | T | 1.14 (0.81 - 1.59) | 4.66 X 10 <sup>-01</sup> | 1.25 (0.94 - 1.66) | 1.21 X 10 <sup>-01</sup> |
| rs7551221  | 1 | 158732056 | CAPON | Promoter   | 0.98 | 3.40E-01 | C | T | 1.28 (0.86 - 1.90) | 2.33 X 10 <sup>-01</sup> | 1.14 (0.82 - 1.57) | 4.36 X 10 <sup>-01</sup> |
| rs7514121  | 1 | 158732090 | CAPON | Promoter   | 0.98 | 9.69E-02 | A | G | 1.33 (0.89 - 1.98) | 1.62 X 10 <sup>-01</sup> | 1.16 (0.84 - 1.60) | 3.65 X 10 <sup>-01</sup> |
| rs885092   | 1 | 158735504 | CAPON | Intron     | 0.99 | 4.39E-01 | A | G | 1.19 (0.74 - 1.90) | 4.77 X 10 <sup>-01</sup> | 0.96 (0.65 - 1.41) | 8.24 X 10 <sup>-01</sup> |
| rs12722883 | 1 | 158739170 | CAPON | Intron     | 0.98 | 1.84E-01 | C | G | 0.98 (0.59 - 1.64) | 9.41 X 10 <sup>-01</sup> | 0.90 (0.59 - 1.37) | 6.18 X 10 <sup>-01</sup> |
| rs7539281  | 1 | 158739692 | CAPON | Intron     | 0.99 | 3.22E-01 | A | G | 1.16 (0.81 - 1.65) | 4.18 X 10 <sup>-01</sup> | 1.24 (0.91 - 1.67) | 1.69 X 10 <sup>-01</sup> |
| rs12084280 | 1 | 158755467 | CAPON | Intron     | 0.99 | 3.00E-04 | C | G | 0.82 (0.46 - 1.48) | 5.10 X 10 <sup>-01</sup> | 0.96 (0.59 - 1.55) | 8.53 X 10 <sup>-01</sup> |
| rs16847548 | 1 | 158766932 | CAPON | Promoter   | 0.98 | 2.93E-01 | C | T | 1.41 (0.97 - 2.06) | 7.57 X 10 <sup>-02</sup> | 1.55 (1.14 - 2.12) | 5.88 X 10 <sup>-03</sup> |
| rs12567209 | 1 | 158768137 | CAPON | Promoter   | 0.99 | 1.03E-01 | A | G | 1.00 (0.52 - 1.91) | 9.96 X 10 <sup>-01</sup> | 0.92 (0.55 - 1.53) | 7.42 X 10 <sup>-01</sup> |
| rs12567211 | 1 | 158768181 | CAPON | Promoter   | 0.96 | 1.29E-01 | G | T | 1.39 (0.97 - 1.99) | 7.41 X 10 <sup>-02</sup> | 1.45 (1.09 - 1.93) | 1.01 X 10 <sup>-02</sup> |
| rs6660701  | 1 | 158772564 | CAPON | Intron     | 0.98 | 6.41E-01 | C | G | 1.20 (0.84 - 1.71) | 3.16 X 10 <sup>-01</sup> | 1.29 (0.98 - 1.70) | 7.29 X 10 <sup>-02</sup> |
| rs1415262  | 1 | 158777793 | CAPON | Intron     | 0.98 | 1.00E+00 | C | G | 1.21 (0.86 - 1.70) | 2.85 X 10 <sup>-01</sup> | 1.44 (1.09 - 1.90) | 1.07 X 10 <sup>-02</sup> |
| rs4656349  | 1 | 158781482 | CAPON | Intron     | 0.98 | 8.30E-01 | A | G | 1.34 (0.95 - 1.90) | 9.85 X 10 <sup>-02</sup> | 1.43 (1.08 - 1.90) | 1.29 X 10 <sup>-02</sup> |
| rs12022557 | 1 | 158787242 | CAPON | Intron     | 0.98 | 1.21E-01 | A | G | 1.14 (0.79 - 1.67) | 4.84 X 10 <sup>-01</sup> | 1.41 (1.04 - 1.93) | 2.93 X 10 <sup>-02</sup> |
| rs10494366 | 1 | 158817343 | CAPON | Intron     | 0.99 | 1.00E+00 | G | T | 1.19 (0.84 - 1.66) | 3.27 X 10 <sup>-01</sup> | 1.29 (0.98 - 1.68) | 6.91 X 10 <sup>-02</sup> |
| rs10458392 | 1 | 158823768 | CAPON | Intron     | 0.97 | 3.82E-01 | G | T | 1.22 (0.84 - 1.77) | 3.02 X 10 <sup>-01</sup> | 1.28 (0.94 - 1.73) | 1.19 X 10 <sup>-01</sup> |
| rs1572495  | 1 | 158830959 | CAPON | Intron     | 0.99 | 1.87E-04 | C | T | 1.05 (0.64 - 1.75) | 8.37 X 10 <sup>-01</sup> | 1.45 (0.93 - 2.27) | 1.05 X 10 <sup>-01</sup> |
| rs1337072  | 1 | 158836316 | CAPON | Intron     | 0.98 | 2.42E-03 | A | G | 1.11 (0.67 - 1.85) | 6.75 X 10 <sup>-01</sup> | 1.44 (0.93 - 2.24) | 1.01 X 10 <sup>-01</sup> |
| rs4657154  | 1 | 158839777 | CAPON | Intron     | 0.99 | 1.57E-01 | A | G | 1.18 (0.82 - 1.69) | 3.74 X 10 <sup>-01</sup> | 1.19 (0.89 - 1.60) | 2.39 X 10 <sup>-01</sup> |
| rs16857031 | 1 | 158844568 | CAPON | Intron     | 0.97 | 3.69E-01 | C | G | 1.14 (0.70 - 1.88) | 5.97 X 10 <sup>-01</sup> | 1.12 (0.76 - 1.65) | 5.72 X 10 <sup>-01</sup> |
| rs7540690  | 1 | 158845875 | CAPON | Intron     | 0.98 | 3.06E-02 | A | G | 1.23 (0.83 - 1.81) | 3.01 X 10 <sup>-01</sup> | 1.29 (0.94 - 1.77) | 1.18 X 10 <sup>-01</sup> |
| rs10918762 | 1 | 158850642 | CAPON | Intron     | 0.95 | 4.22E-03 | A | G | 1.34 (0.90 - 1.98) | 1.45 X 10 <sup>-01</sup> | 1.12 (0.82 - 1.53) | 4.74 X 10 <sup>-01</sup> |
| rs12124105 | 1 | 158854285 | CAPON | Intron     | 0.98 | 3.72E-01 | A | T | 0.91 (0.48 - 1.71) | 7.63 X 10 <sup>-01</sup> | 1.35 (0.81 - 2.25) | 2.50 X 10 <sup>-01</sup> |
| rs4656355  | 1 | 158855455 | CAPON | Intron     | 0.98 | 5.46E-01 | A | G | 1.15 (0.82 - 1.59) | 4.19 X 10 <sup>-01</sup> | 1.15 (0.87 - 1.51) | 3.28 X 10 <sup>-01</sup> |
| rs951121   | 1 | 158858102 | CAPON | Intron     | 0.98 | 3.73E-02 | A | G | 1.04 (0.68 - 1.58) | 8.69 X 10 <sup>-01</sup> | 1.14 (0.79 - 1.64) | 4.74 X 10 <sup>-01</sup> |
| rs880296   | 1 | 158860104 | CAPON | Intron     | 0.98 | 4.18E-01 | C | G | 1.47 (0.98 - 2.21) | 5.98 X 10 <sup>-02</sup> | 1.18 (0.87 - 1.60) | 2.76 X 10 <sup>-01</sup> |
| rs12069336 | 1 | 158860992 | CAPON | Intron     | 0.98 | 3.33E-01 | A | G | 1.12 (0.72 - 1.72) | 6.17 X 10 <sup>-01</sup> | 1.18 (0.82 - 1.71) | 3.69 X 10 <sup>-01</sup> |
| rs12068421 | 1 | 158861204 | CAPON | Intron     | 0.99 | 1.00E+00 | C | T | 1.12 (0.72 - 1.75) | 6.22 X 10 <sup>-01</sup> | 1.27 (0.87 - 1.87) | 2.15 X 10 <sup>-01</sup> |
| rs12026452 | 1 | 158861944 | CAPON | Intron     | 0.98 | 2.18E-01 | A | G | 1.48 (0.94 - 2.34) | 9.23 X 10 <sup>-02</sup> | 1.10 (0.79 - 1.54) | 5.65 X 10 <sup>-01</sup> |
| rs7546353  | 1 | 158871350 | CAPON | Intron     | 0.98 | 1.67E-01 | A | C | 0.79 (0.53 - 1.18) | 2.46 X 10 <sup>-01</sup> | 0.90 (0.64 - 1.26) | 5.28 X 10 <sup>-01</sup> |
| rs7549718  | 1 | 158872520 | CAPON | Intron     | 0.99 | 3.71E-01 | A | G | 1.01 (0.73 - 1.40) | 9.61 X 10 <sup>-01</sup> | 0.99 (0.76 - 1.29) | 9.26 X 10 <sup>-01</sup> |
| rs7412698  | 1 | 158886877 | CAPON | Intron     | 0.99 | 5.32E-01 | C | T | 0.94 (0.67 - 1.31) | 7.01 X 10 <sup>-01</sup> | 0.99 (0.75 - 1.30) | 9.34 X 10 <sup>-01</sup> |
| rs4657163  | 1 | 158892514 | CAPON | Intron     | 0.99 | 3.75E-01 | C | G | 1.25 (0.76 - 2.06) | 3.83 X 10 <sup>-01</sup> | 0.93 (0.63 - 1.38) | 7.09 X 10 <sup>-01</sup> |
| rs4657166  | 1 | 158892997 | CAPON | Intron     | 0.99 | 5.44E-01 | C | G | 0.98 (0.69 - 1.38) | 8.91 X 10 <sup>-01</sup> | 1.01 (0.76 - 1.34) | 9.57 X 10 <sup>-01</sup> |
| rs12047527 | 1 | 158893992 | CAPON | Intron     | 0.97 | 8.67E-01 | C | T | 1.37 (0.95 - 1.98) | 8.91 X 10 <sup>-02</sup> | 0.97 (0.73 - 1.30) | 8.57 X 10 <sup>-01</sup> |
| rs7513132  | 1 | 158897091 | CAPON | Intron     | 0.97 | 2.10E-01 | A | G | 1.14 (0.81 - 1.60) | 4.51 X 10 <sup>-01</sup> | 0.92 (0.70 - 1.22) | 5.57 X 10 <sup>-01</sup> |
| rs10918859 | 1 | 158900926 | CAPON | Intron     | 0.98 | 8.75E-01 | A | G | 1.16 (0.76 - 1.78) | 4.91 X 10 <sup>-01</sup> | 1.10 (0.79 - 1.52) | 5.69 X 10 <sup>-01</sup> |
| rs6676638  | 1 | 158907547 | CAPON | Intron     | 0.99 | 6.44E-01 | A | G | 0.79 (0.45 - 1.37) | 3.95 X 10 <sup>-01</sup> | 0.69 (0.45 - 1.08) | 1.05 X 10 <sup>-01</sup> |
| rs6677606  | 1 | 158915561 | CAPON | Intron     | 0.97 | 6.82E-01 | C | T | 0.89 (0.49 - 1.61) | 7.09 X 10 <sup>-01</sup> | 0.90 (0.56 - 1.46) | 6.66 X 10 <sup>-01</sup> |

|            |   |           |       |            |      |          |   |   |                    |                          |                    |                          |
|------------|---|-----------|-------|------------|------|----------|---|---|--------------------|--------------------------|--------------------|--------------------------|
| rs4531275  | 1 | 158918208 | CAPON | Intron     | 0.98 | 2.32E-01 | C | T | 1.08 (0.76 - 1.54) | 6.60 X 10 <sup>-01</sup> | 1.05 (0.79 - 1.39) | 7.39 X 10 <sup>-01</sup> |
| rs3924139  | 1 | 158923770 | CAPON | Intron     | 0.98 | 2.11E-01 | A | G | 1.05 (0.75 - 1.48) | 7.63 X 10 <sup>-01</sup> | 0.95 (0.72 - 1.26) | 7.35 X 10 <sup>-01</sup> |
| rs4424487  | 1 | 158931020 | CAPON | Intron     | 0.99 | 8.40E-01 | A | T | 0.97 (0.69 - 1.35) | 8.41 X 10 <sup>-01</sup> | 1.04 (0.79 - 1.36) | 7.90 X 10 <sup>-01</sup> |
| rs8179404  | 1 | 158932778 | CAPON | Intron     | 0.98 | 5.13E-01 | C | T | 0.97 (0.62 - 1.51) | 8.88 X 10 <sup>-01</sup> | 0.80 (0.56 - 1.14) | 2.19 X 10 <sup>-01</sup> |
| rs10918936 | 1 | 158934146 | CAPON | Intron     | 0.98 | 4.61E-02 | A | G | 1.11 (0.79 - 1.54) | 5.56 X 10 <sup>-01</sup> | 0.93 (0.71 - 1.22) | 6.02 X 10 <sup>-01</sup> |
| rs4657178  | 1 | 158942268 | CAPON | Intron     | 0.99 | 1.84E-01 | C | T | 1.19 (0.83 - 1.72) | 3.36 X 10 <sup>-01</sup> | 1.03 (0.76 - 1.38) | 8.51 X 10 <sup>-01</sup> |
| rs10918963 | 1 | 158945525 | CAPON | Intron     | 0.98 | 6.85E-01 | C | T | 1.21 (0.82 - 1.80) | 3.39 X 10 <sup>-01</sup> | 1.11 (0.81 - 1.51) | 5.20 X 10 <sup>-01</sup> |
| rs17459307 | 1 | 158947326 | CAPON | Intron     | 0.99 | 3.01E-01 | A | G | 0.89 (0.43 - 1.87) | 7.63 X 10 <sup>-01</sup> | 0.60 (0.32 - 1.11) | 1.04 X 10 <sup>-01</sup> |
| rs4145621  | 1 | 158950346 | CAPON | Intron     | 0.98 | 2.25E-01 | C | T | 1.05 (0.76 - 1.45) | 7.66 X 10 <sup>-01</sup> | 0.96 (0.74 - 1.26) | 7.91 X 10 <sup>-01</sup> |
| rs6677052  | 1 | 158951397 | CAPON | Intron     | 0.97 | 9.29E-01 | A | G | 1.00 (0.64 - 1.54) | 9.86 X 10 <sup>-01</sup> | 0.99 (0.69 - 1.42) | 9.58 X 10 <sup>-01</sup> |
| rs10919002 | 1 | 158960088 | CAPON | Intron     | 0.99 | 4.07E-01 | A | G | 1.26 (0.80 - 1.98) | 3.19 X 10 <sup>-01</sup> | 1.20 (0.84 - 1.70) | 3.18 X 10 <sup>-01</sup> |
| rs4584372  | 1 | 158967095 | CAPON | Intron     | 0.99 | 8.94E-01 | C | T | 0.85 (0.58 - 1.24) | 3.90 X 10 <sup>-01</sup> | 0.87 (0.64 - 1.19) | 3.77 X 10 <sup>-01</sup> |
| rs12410644 | 1 | 158969313 | CAPON | Intron     | 0.98 | 3.81E-01 | C | T | 0.88 (0.60 - 1.28) | 4.92 X 10 <sup>-01</sup> | 0.82 (0.60 - 1.12) | 2.05 X 10 <sup>-01</sup> |
| rs10157390 | 1 | 158978954 | CAPON | Intron     | 0.98 | 4.04E-01 | G | T | 1.03 (0.73 - 1.44) | 8.86 X 10 <sup>-01</sup> | 1.01 (0.77 - 1.34) | 9.29 X 10 <sup>-01</sup> |
| rs4657180  | 1 | 158979396 | CAPON | Intron     | 0.99 | 8.13E-01 | C | T | 0.87 (0.53 - 1.42) | 5.64 X 10 <sup>-01</sup> | 0.82 (0.53 - 1.27) | 3.80 X 10 <sup>-01</sup> |
| rs7528328  | 1 | 158979437 | CAPON | Intron     | 0.93 | 5.09E-01 | A | T | 0.90 (0.59 - 1.38) | 6.31 X 10 <sup>-01</sup> | 0.92 (0.65 - 1.30) | 6.39 X 10 <sup>-01</sup> |
| rs10753784 | 1 | 158980578 | CAPON | Intron     | 0.97 | 7.30E-01 | C | G | 0.95 (0.68 - 1.31) | 7.45 X 10 <sup>-01</sup> | 0.95 (0.72 - 1.25) | 7.13 X 10 <sup>-01</sup> |
| rs6671271  | 1 | 158981667 | CAPON | Intron     | 0.99 | 1.65E-01 | A | G | 0.91 (0.54 - 1.53) | 7.26 X 10 <sup>-01</sup> | 1.25 (0.79 - 1.98) | 3.39 X 10 <sup>-01</sup> |
| rs12733377 | 1 | 158984101 | CAPON | Intron     | 0.98 | 4.98E-01 | A | G | 1.00 (0.73 - 1.37) | 9.94 X 10 <sup>-01</sup> | 0.97 (0.74 - 1.27) | 8.09 X 10 <sup>-01</sup> |
| rs6677154  | 1 | 158986322 | CAPON | Intron     | 0.98 | 6.53E-01 | A | G | 1.00 (0.68 - 1.48) | 9.92 X 10 <sup>-01</sup> | 1.03 (0.76 - 1.39) | 8.72 X 10 <sup>-01</sup> |
| rs6677529  | 1 | 158995412 | CAPON | Intron     | 0.98 | 1.04E-01 | A | C | 0.86 (0.57 - 1.30) | 4.84 X 10 <sup>-01</sup> | 0.86 (0.61 - 1.22) | 4.07 X 10 <sup>-01</sup> |
| rs2341744  | 1 | 159000680 | CAPON | Intron     | 0.98 | 8.84E-01 | A | G | 1.43 (1.04 - 1.97) | 2.84 X 10 <sup>-02</sup> | 1.32 (1.02 - 1.71) | 3.67 X 10 <sup>-02</sup> |
| rs365522   | 1 | 159024244 | CAPON | Intron     | 0.96 | 7.01E-01 | C | G | 0.82 (0.59 - 1.16) | 2.67 X 10 <sup>-01</sup> | 0.93 (0.70 - 1.23) | 6.21 X 10 <sup>-01</sup> |
| rs12048222 | 1 | 159025752 | CAPON | Intron     | 0.97 | 1.42E-01 | A | G | 0.72 (0.49 - 1.06) | 9.12 X 10 <sup>-02</sup> | 0.87 (0.63 - 1.19) | 3.74 X 10 <sup>-01</sup> |
| rs347298   | 1 | 159029604 | CAPON | Intron     | 0.98 | 6.00E-01 | A | C | 0.78 (0.56 - 1.09) | 1.49 X 10 <sup>-01</sup> | 0.89 (0.68 - 1.16) | 3.83 X 10 <sup>-01</sup> |
| rs347301   | 1 | 159032718 | CAPON | Intron     | 0.98 | 9.16E-01 | A | C | 0.75 (0.53 - 1.05) | 9.75 X 10 <sup>-02</sup> | 0.88 (0.67 - 1.15) | 3.38 X 10 <sup>-01</sup> |
| rs347311   | 1 | 159035565 | CAPON | Intron     | 0.96 | 7.07E-01 | C | G | 1.33 (0.93 - 1.93) | 1.23 X 10 <sup>-01</sup> | 1.14 (0.85 - 1.52) | 3.80 X 10 <sup>-01</sup> |
| rs347313   | 1 | 159035934 | CAPON | Intron     | 0.98 | 8.07E-01 | A | G | 0.72 (0.52 - 1.00) | 5.18 X 10 <sup>-02</sup> | 0.91 (0.71 - 1.17) | 4.71 X 10 <sup>-01</sup> |
| rs11586404 | 1 | 159037586 | CAPON | Intron     | 0.99 | 6.73E-01 | A | G | 1.13 (0.70 - 1.83) | 6.21 X 10 <sup>-01</sup> | 1.02 (0.70 - 1.48) | 9.32 X 10 <sup>-01</sup> |
| rs10753789 | 1 | 159037865 | CAPON | Intron     | 0.99 | 6.02E-01 | A | G | 0.68 (0.48 - 0.98) | 3.61 X 10 <sup>-02</sup> | 0.92 (0.70 - 1.20) | 5.28 X 10 <sup>-01</sup> |
| rs1396225  | 1 | 159040379 | CAPON | Intron     | 0.92 | 2.04E-72 | A | G | 1.02 (0.77 - 1.36) | 8.80 X 10 <sup>-01</sup> | 1.06 (0.84 - 1.34) | 6.15 X 10 <sup>-01</sup> |
| rs10800465 | 1 | 159041971 | CAPON | Intron     | 0.98 | 3.80E-01 | C | T | 0.60 (0.42 - 0.87) | 6.17 X 10 <sup>-03</sup> | 0.83 (0.62 - 1.12) | 2.28 X 10 <sup>-01</sup> |
| rs347273   | 1 | 159049171 | CAPON | Intron     | 0.98 | 0.00E+00 | C | T | 1.26 (0.97 - 1.63) | 8.20 X 10 <sup>-02</sup> | 1.14 (0.94 - 1.40) | 1.89 X 10 <sup>-01</sup> |
| rs12403202 | 1 | 159054613 | CAPON | Intron     | 0.98 | 3.37E-01 | C | T | 0.86 (0.59 - 1.25) | 4.18 X 10 <sup>-01</sup> | 1.00 (0.74 - 1.36) | 9.80 X 10 <sup>-01</sup> |
| rs449908   | 1 | 159056103 | CAPON | Intron     | 0.98 | 9.09E-02 | A | G | 0.84 (0.57 - 1.24) | 3.83 X 10 <sup>-01</sup> | 0.93 (0.69 - 1.27) | 6.56 X 10 <sup>-01</sup> |
| rs1510289  | 1 | 159060200 | CAPON | Intron     | 0.99 | 8.53E-01 | A | T | 1.10 (0.61 - 1.99) | 7.46 X 10 <sup>-01</sup> | 1.37 (0.86 - 2.18) | 1.87 X 10 <sup>-01</sup> |
| rs6681981  | 1 | 159063279 | CAPON | Intron     | 0.98 | 4.55E-02 | A | G | 1.00 (0.72 - 1.38) | 9.77 X 10 <sup>-01</sup> | 1.16 (0.89 - 1.51) | 2.58 X 10 <sup>-01</sup> |
| rs17428733 | 1 | 159064179 | CAPON | Intron     | 0.95 | 1.00E+00 | A | T | 1.16 (0.76 - 1.78) | 4.89 X 10 <sup>-01</sup> | 1.06 (0.75 - 1.50) | 7.36 X 10 <sup>-01</sup> |
| rs905720   | 1 | 159065758 | CAPON | Downstream | 0.99 | 5.59E-01 | C | T | 1.22 (0.86 - 1.75) | 2.66 X 10 <sup>-01</sup> | 1.09 (0.82 - 1.46) | 5.44 X 10 <sup>-01</sup> |
| rs1810354  | 1 | 159067380 | CAPON | Downstream | 0.96 | 7.67E-02 | A | T | 1.30 (0.81 - 2.08) | 2.77 X 10 <sup>-01</sup> | 1.05 (0.73 - 1.53) | 7.92 X 10 <sup>-01</sup> |
| rs164147   | 1 | 159070055 | CAPON | Downstream | 0.98 | 1.02E-01 | A | C | 1.13 (0.73 - 1.75) | 5.74 X 10 <sup>-01</sup> | 1.14 (0.79 - 1.63) | 4.86 X 10 <sup>-01</sup> |
| rs164149   | 1 | 159070239 | CAPON | Downstream | 0.97 | 3.99E-03 | A | G | 1.11 (0.80 - 1.54) | 5.44 X 10 <sup>-01</sup> | 1.17 (0.91 - 1.51) | 2.18 X 10 <sup>-01</sup> |
| rs164154   | 1 | 159073861 | CAPON | Downstream | 0.98 | 8.08E-01 | A | G | 0.96 (0.70 - 1.32) | 8.08 X 10 <sup>-01</sup> | 0.87 (0.67 - 1.13) | 3.04 X 10 <sup>-01</sup> |
| rs164155   | 1 | 159073999 | CAPON | Downstream | 0.99 | 1.00E+00 | A | G | 0.83 (0.58 - 1.18) | 3.02 X 10 <sup>-01</sup> | 0.81 (0.61 - 1.07) | 1.38 X 10 <sup>-01</sup> |
| rs164158   | 1 | 159075046 | CAPON | Downstream | 0.98 | 8.01E-01 | C | T | 0.81 (0.55 - 1.19) | 2.73 X 10 <sup>-01</sup> | 0.82 (0.60 - 1.12) | 2.02 X 10 <sup>-01</sup> |
| rs7512126  | 1 | 159075432 | CAPON | Downstream | 0.97 | 6.03E-02 | A | G | 1.06 (0.78 - 1.46) | 7.07 X 10 <sup>-01</sup> | 1.04 (0.80 - 1.35) | 7.80 X 10 <sup>-01</sup> |
| rs164180   | 1 | 159076216 | CAPON | Intron     | 0.98 | 1.34E-01 | A | G | 0.69 (0.46 - 1.03) | 6.67 X 10 <sup>-02</sup> | 0.76 (0.55 - 1.04) | 8.67 X 10 <sup>-02</sup> |
| rs3737312  | 1 | 159076952 | CAPON | Intron     | 0.99 | 2.25E-01 | A | C | 1.17 (0.82 - 1.69) | 3.84 X 10 <sup>-01</sup> | 1.08 (0.82 - 1.43) | 5.82 X 10 <sup>-01</sup> |
| rs4657188  | 1 | 159079535 | CAPON | Promoter   | 0.98 | 4.06E-02 | C | G | 1.09 (0.78 - 1.52) | 6.16 X 10 <sup>-01</sup> | 1.16 (0.88 - 1.52) | 2.88 X 10 <sup>-01</sup> |
| rs164041   | 1 | 159079775 | CAPON | Promoter   | 0.98 | 1.23E-01 | C | G | 1.18 (0.75 - 1.85) | 4.69 X 10 <sup>-01</sup> | 0.93 (0.66 - 1.31) | 6.76 X 10 <sup>-01</sup> |
| rs6695553  | 1 | 159081952 | CAPON | Promoter   | 0.96 | 7.69E-01 | C | G | 1.10 (0.80 - 1.52) | 5.65 X 10 <sup>-01</sup> | 1.05 (0.81 - 1.36) | 7.21 X 10 <sup>-01</sup> |
| rs11806836 | 1 | 159082109 | CAPON | Promoter   | 0.98 | 8.86E-01 | C | G | 0.89 (0.61 - 1.29) | 5.40 X 10 <sup>-01</sup> | 1.09 (0.79 - 1.51) | 5.89 X 10 <sup>-01</sup> |
| rs12131795 | 1 | 159082293 | CAPON | Promoter   | 0.98 | 5.20E-01 | A | G | 0.87 (0.60 - 1.24) | 4.38 X 10 <sup>-01</sup> | 1.00 (0.73 - 1.35) | 9.78 X 10 <sup>-01</sup> |
| rs12407972 | 1 | 159083112 | CAPON | Promoter   | 0.98 | 3.96E-01 | A | G | 1.21 (0.78 - 1.90) | 3.99 X 10 <sup>-01</sup> | 1.17 (0.81 - 1.69) | 4.02 X 10 <sup>-01</sup> |
| rs164189   | 1 | 159083789 | CAPON | Promoter   | 0.97 | 3.79E-01 | C | T | 0.81 (0.59 - 1.12) | 2.02 X 10 <sup>-01</sup> | 0.91 (0.70 - 1.18) | 4.73 X 10 <sup>-01</sup> |
| rs10919302 | 1 | 159084067 | CAPON | Promoter   | 0.98 | 3.04E-01 | A | G | 0.96 (0.68 - 1.36) | 8.23 X 10 <sup>-01</sup> | 1.02 (0.76 - 1.37) | 8.86 X 10 <sup>-01</sup> |
| rs164417   | 1 | 159085384 | CAPON | Promoter   | 0.98 | 1.86E-01 | A | G | 1.18 (0.85 - 1.64) | 3.31 X 10 <sup>-01</sup> | 0.97 (0.75 - 1.26) | 8.25 X 10 <sup>-01</sup> |
| rs164176   | 1 | 159087147 | CAPON | Promoter   | 0.98 | 1.00E+00 | A | G | 1.47 (0.95 - 2.28) | 8.16 X 10 <sup>-02</sup> | 1.11 (0.80 - 1.54) | 5.45 X 10 <sup>-01</sup> |
| rs164177   | 1 | 159087798 | CAPON | Promoter   | 0.98 | 3.45E-03 | A | G | 1.50 (1.05 - 2.14) | 2.66 X 10 <sup>-02</sup> | 1.01 (0.77 - 1.32) | 9.67 X 10 <sup>-01</sup> |
| rs164420   | 1 | 159091404 | CAPON | Downstream | 0.98 | 2.45E-01 | C | T | 1.03 (0.72 - 1.47) | 8.68 X 10 <sup>-01</sup> | 1.07 (0.79 - 1.44) | 6.60 X 10 <sup>-01</sup> |
| rs164124   | 1 | 159098893 | CAPON | Intron     | 0.98 | 2.50E-01 | A | G | 0.55 (0.39 - 0.78) | 6.49 X 10 <sup>-04</sup> | 0.80 (0.60 - 1.06) | 1.16 X 10 <sup>-01</sup> |
| rs164122   | 1 | 159100015 | CAPON | Intron     | 0.99 | 1.49E-01 | A | G | 1.47 (1.06 - 2.04) | 2.00 X 10 <sup>-02</sup> | 1.20 (0.92 - 1.56) | 1.69 X 10 <sup>-01</sup> |
| rs12746024 | 1 | 159106511 | CAPON | Intron     | 0.98 | 7.43E-02 | A | C | 1.19 (0.83 - 1.70) | 3.54 X 10 <sup>-01</sup> | 0.92 (0.69 - 1.23) | 5.75 X 10 <sup>-01</sup> |
| rs164584   | 1 | 159123809 | CAPON |            | 0.97 | 7.35E-02 | A | C | 1.21 (0.87 - 1.68) | 2.52 X 10 <sup>-01</sup> | 1.05 (0.81 - 1.36) | 7.18 X 10 <sup>-01</sup> |

|            |   |           |       |          |      |          |   |   |                    |                          |                    |                          |
|------------|---|-----------|-------|----------|------|----------|---|---|--------------------|--------------------------|--------------------|--------------------------|
| rs469815   | 1 | 159132445 | CAPON |          | 0.97 | 3.27E-01 | C | G | 1.01 (0.70 - 1.45) | 9.56 X 10 <sup>-01</sup> | 1.07 (0.79 - 1.44) | 6.81 X 10 <sup>-01</sup> |
| rs164597   | 1 | 159144597 | CAPON |          | 0.98 | 3.93E-01 | C | T | 1.01 (0.72 - 1.41) | 9.47 X 10 <sup>-01</sup> | 1.02 (0.77 - 1.35) | 8.94 X 10 <sup>-01</sup> |
| rs10800533 | 1 | 159148287 | CAPON |          | 0.97 | 1.39E-01 | A | G | 1.4 (0.92 - 2.11)  | 1.12 X 10 <sup>-01</sup> | 1.08 (0.78 - 1.50) | 6.51 X 10 <sup>-01</sup> |
| rs469726   | 1 | 159148765 | CAPON |          | 0.98 | 1.00E+00 | A | G | 1.05 (0.70 - 1.58) | 8.00 X 10 <sup>-01</sup> | 1.07 (0.77 - 1.50) | 6.87 X 10 <sup>-01</sup> |
| rs12131428 | 1 | 159158109 | CAPON |          | 0.99 | 2.48E-01 | C | G | 0.90 (0.52 - 1.58) | 7.25 X 10 <sup>-01</sup> | 0.79 (0.50 - 1.23) | 2.95 X 10 <sup>-01</sup> |
| rs6693538  | 1 | 233427685 | RYR2  |          | 0.98 | 8.39E-01 | A | G | 0.92 (0.66 - 1.28) | 6.19 X 10 <sup>-01</sup> | 0.84 (0.64 - 1.10) | 1.97 X 10 <sup>-01</sup> |
| rs1252101  | 1 | 233429661 | RYR2  |          | 0.99 | 4.27E-03 | C | T | 0.77 (0.55 - 1.07) | 1.19 X 10 <sup>-01</sup> | 1.01 (0.77 - 1.33) | 9.41 X 10 <sup>-01</sup> |
| rs1252103  | 1 | 233430681 | RYR2  |          | 0.97 | 2.97E-01 | C | T | 0.85 (0.59 - 1.22) | 3.69 X 10 <sup>-01</sup> | 1.06 (0.79 - 1.43) | 6.94 X 10 <sup>-01</sup> |
| rs4659482  | 1 | 233430900 | RYR2  |          | 0.98 | 5.30E-01 | A | G | 1.20 (0.75 - 1.94) | 4.43 X 10 <sup>-01</sup> | 1.09 (0.77 - 1.54) | 6.44 X 10 <sup>-01</sup> |
| rs4659483  | 1 | 233446771 | RYR2  |          | 0.99 | 3.60E-01 | C | T | 0.88 (0.63 - 1.23) | 4.67 X 10 <sup>-01</sup> | 1.11 (0.85 - 1.44) | 4.57 X 10 <sup>-01</sup> |
| rs9428650  | 1 | 233455103 | RYR2  |          | 0.98 | 9.09E-01 | A | T | 0.78 (0.54 - 1.11) | 1.68 X 10 <sup>-01</sup> | 0.95 (0.71 - 1.26) | 7.25 X 10 <sup>-01</sup> |
| rs6683896  | 1 | 233455376 | RYR2  |          | 0.98 | 2.14E-01 | G | T | 0.91 (0.66 - 1.27) | 5.89 X 10 <sup>-01</sup> | 0.92 (0.71 - 1.20) | 5.37 X 10 <sup>-01</sup> |
| rs1252126  | 1 | 233456337 | RYR2  |          | 0.98 | 7.92E-01 | C | T | 0.79 (0.57 - 1.10) | 1.63 X 10 <sup>-01</sup> | 0.85 (0.65 - 1.12) | 2.60 X 10 <sup>-01</sup> |
| rs1252128  | 1 | 233457381 | RYR2  |          | 0.97 | 3.74E-01 | A | G | 1.18 (0.86 - 1.63) | 3.12 X 10 <sup>-01</sup> | 1.04 (0.81 - 1.34) | 7.35 X 10 <sup>-01</sup> |
| rs17609678 | 1 | 233457556 | RYR2  |          | 0.99 | 6.38E-01 | A | G | 0.77 (0.48 - 1.23) | 2.75 X 10 <sup>-01</sup> | 0.90 (0.62 - 1.31) | 5.74 X 10 <sup>-01</sup> |
| rs1252129  | 1 | 233458152 | RYR2  |          | 0.99 | 4.33E-01 | A | C | 0.87 (0.53 - 1.41) | 5.63 X 10 <sup>-01</sup> | 0.74 (0.50 - 1.09) | 1.26 X 10 <sup>-01</sup> |
| rs6682983  | 1 | 233458199 | RYR2  |          | 0.98 | 5.57E-01 | A | T | 1.00 (0.70 - 1.43) | 9.98 X 10 <sup>-01</sup> | 0.88 (0.66 - 1.18) | 3.84 X 10 <sup>-01</sup> |
| rs6685619  | 1 | 233458238 | RYR2  |          | 0.99 | 7.96E-01 | G | T | 0.91 (0.66 - 1.28) | 5.99 X 10 <sup>-01</sup> | 0.84 (0.64 - 1.11) | 2.18 X 10 <sup>-01</sup> |
| rs1252130  | 1 | 233458761 | RYR2  |          | 0.99 | 4.79E-01 | A | C | 0.97 (0.64 - 1.47) | 8.71 X 10 <sup>-01</sup> | 0.88 (0.62 - 1.25) | 4.77 X 10 <sup>-01</sup> |
| rs1252133  | 1 | 233460509 | RYR2  |          | 0.97 | 7.33E-01 | C | G | 1.06 (0.77 - 1.44) | 7.34 X 10 <sup>-01</sup> | 0.92 (0.71 - 1.19) | 5.25 X 10 <sup>-01</sup> |
| rs1252136  | 1 | 233465250 | RYR2  |          | 0.98 | 8.75E-01 | C | G | 1.22 (0.87 - 1.69) | 2.48 X 10 <sup>-01</sup> | 1.12 (0.86 - 1.46) | 4.02 X 10 <sup>-01</sup> |
| rs1252138  | 1 | 233467001 | RYR2  |          | 0.98 | 1.52E-01 | G | T | 1.08 (0.68 - 1.73) | 7.35 X 10 <sup>-01</sup> | 1.18 (0.80 - 1.72) | 4.01 X 10 <sup>-01</sup> |
| rs7518824  | 1 | 233471602 | RYR2  |          | 0.99 | 3.08E-01 | C | T | 1.28 (0.86 - 1.90) | 2.31 X 10 <sup>-01</sup> | 1.08 (0.80 - 1.46) | 6.12 X 10 <sup>-01</sup> |
| rs1729486  | 1 | 233474171 | RYR2  |          | 0.98 | 5.85E-01 | A | G | 1.06 (0.70 - 1.61) | 7.83 X 10 <sup>-01</sup> | 1.08 (0.76 - 1.54) | 6.56 X 10 <sup>-01</sup> |
| rs1934741  | 1 | 233482048 | RYR2  |          | 0.99 | 3.86E-01 | C | T | 0.98 (0.63 - 1.53) | 9.46 X 10 <sup>-01</sup> | 0.86 (0.61 - 1.22) | 3.99 X 10 <sup>-01</sup> |
| rs1252149  | 1 | 233485215 | RYR2  |          | 0.98 | 1.50E-01 | C | G | 1.05 (0.76 - 1.46) | 7.67 X 10 <sup>-01</sup> | 0.96 (0.73 - 1.25) | 7.48 X 10 <sup>-01</sup> |
| rs12047281 | 1 | 233487508 | RYR2  |          | 0.98 | 6.57E-01 | C | T | 1.18 (0.86 - 1.63) | 2.97 X 10 <sup>-01</sup> | 1.24 (0.95 - 1.62) | 1.20 X 10 <sup>-01</sup> |
| rs16834742 | 1 | 233489539 | RYR2  |          | 0.99 | 9.26E-02 | C | T | 0.64 (0.42 - 0.97) | 3.47 X 10 <sup>-02</sup> | 0.79 (0.55 - 1.13) | 1.99 X 10 <sup>-01</sup> |
| rs4659762  | 1 | 233493259 | RYR2  |          | 0.97 | 4.95E-01 | A | G | 0.98 (0.71 - 1.35) | 9.14 X 10 <sup>-01</sup> | 1.12 (0.85 - 1.46) | 4.23 X 10 <sup>-01</sup> |
| rs17611358 | 1 | 233494777 | RYR2  |          | 0.99 | 9.50E-01 | A | G | 0.75 (0.52 - 1.07) | 1.10 X 10 <sup>-01</sup> | 0.87 (0.64 - 1.17) | 3.45 X 10 <sup>-01</sup> |
| rs12409147 | 1 | 233496502 | RYR2  |          | 0.97 | 2.13E-02 | A | G | 1.46 (0.96 - 2.24) | 7.94 X 10 <sup>-02</sup> | 1.30 (0.93 - 1.82) | 1.30 X 10 <sup>-01</sup> |
| rs4659764  | 1 | 233497427 | RYR2  |          | 0.97 | 4.78E-01 | A | G | 1.06 (0.75 - 1.48) | 7.50 X 10 <sup>-01</sup> | 1.17 (0.89 - 1.53) | 2.63 X 10 <sup>-01</sup> |
| rs12724972 | 1 | 233503613 | RYR2  |          | 0.96 | 1.00E-01 | C | T | 1.15 (0.77 - 1.71) | 4.94 X 10 <sup>-01</sup> | 1.21 (0.88 - 1.67) | 2.35 X 10 <sup>-01</sup> |
| rs7520301  | 1 | 233517613 | RYR2  |          | 0.99 | 6.94E-03 | C | T | 1.06 (0.74 - 1.50) | 7.61 X 10 <sup>-01</sup> | 1.11 (0.83 - 1.48) | 4.87 X 10 <sup>-01</sup> |
| rs12239398 | 1 | 233520445 | RYR2  |          | 0.97 | 3.75E-02 | C | T | 0.94 (0.69 - 1.28) | 6.85 X 10 <sup>-01</sup> | 0.94 (0.73 - 1.22) | 6.53 X 10 <sup>-01</sup> |
| rs12022449 | 1 | 233522454 | RYR2  | Promoter | 0.98 | 4.91E-01 | A | G | 0.90 (0.63 - 1.28) | 5.49 X 10 <sup>-01</sup> | 0.81 (0.61 - 1.06) | 1.22 X 10 <sup>-01</sup> |
| rs12403151 | 1 | 233523549 | RYR2  | Promoter | 0.99 | 2.19E-02 | A | G | 0.82 (0.53 - 1.25) | 3.55 X 10 <sup>-01</sup> | 1.01 (0.71 - 1.43) | 9.66 X 10 <sup>-01</sup> |
| rs2385576  | 1 | 233525816 | RYR2  | Promoter | 0.97 | 1.30E-01 | A | T | 1.18 (0.86 - 1.63) | 2.95 X 10 <sup>-01</sup> | 1.20 (0.93 - 1.53) | 1.61 X 10 <sup>-01</sup> |
| rs12126370 | 1 | 233528207 | RYR2  | Promoter | 0.97 | 9.21E-01 | G | G | 0.91 (0.66 - 1.25) | 5.43 X 10 <sup>-01</sup> | 0.92 (0.71 - 1.18) | 5.07 X 10 <sup>-01</sup> |
| rs1406412  | 1 | 233530063 | RYR2  | Promoter | 0.98 | 9.07E-01 | A | T | 1.21 (0.86 - 1.70) | 2.78 X 10 <sup>-01</sup> | 1.07 (0.81 - 1.41) | 6.46 X 10 <sup>-01</sup> |
| rs1881548  | 1 | 233533230 | RYR2  | Intron   | 0.98 | 8.22E-01 | A | G | 0.91 (0.62 - 1.33) | 6.14 X 10 <sup>-01</sup> | 0.93 (0.68 - 1.27) | 6.61 X 10 <sup>-01</sup> |
| rs6678625  | 1 | 233536044 | RYR2  | Intron   | 0.98 | 1.00E+00 | C | T | 0.81 (0.52 - 1.24) | 3.27 X 10 <sup>-01</sup> | 1.04 (0.73 - 1.48) | 8.39 X 10 <sup>-01</sup> |
| rs1124814  | 1 | 233542097 | RYR2  | Intron   | 0.96 | 2.94E-03 | C | T | 0.73 (0.53 - 1.01) | 5.61 X 10 <sup>-02</sup> | 0.78 (0.60 - 1.01) | 6.27 X 10 <sup>-02</sup> |
| rs12090226 | 1 | 233550020 | RYR2  | Intron   | 0.99 | 7.59E-01 | C | G | 0.95 (0.64 - 1.42) | 8.19 X 10 <sup>-01</sup> | 0.89 (0.64 - 1.23) | 4.87 X 10 <sup>-01</sup> |
| rs9428653  | 1 | 233551658 | RYR2  | Intron   | 0.98 | 2.81E-01 | A | G | 0.94 (0.68 - 1.29) | 6.99 X 10 <sup>-01</sup> | 0.92 (0.70 - 1.20) | 5.48 X 10 <sup>-01</sup> |
| rs6428985  | 1 | 233557031 | RYR2  | Intron   | 0.98 | 4.15E-01 | C | T | 1.01 (0.67 - 1.54) | 9.48 X 10 <sup>-01</sup> | 1.01 (0.71 - 1.44) | 9.60 X 10 <sup>-01</sup> |
| rs6697811  | 1 | 233561914 | RYR2  | Intron   | 0.97 | 7.57E-01 | C | T | 1.51 (0.95 - 2.41) | 8.44 X 10 <sup>-02</sup> | 1.31 (0.91 - 1.89) | 1.43 X 10 <sup>-01</sup> |
| rs2997486  | 1 | 233570815 | RYR2  | Intron   | 0.97 | 1.45E-03 | C | G | 1.26 (0.87 - 1.83) | 2.22 X 10 <sup>-01</sup> | 0.93 (0.69 - 1.25) | 6.36 X 10 <sup>-01</sup> |
| rs6684412  | 1 | 233573104 | RYR2  | Intron   | 0.98 | 4.70E-01 | A | C | 1.39 (0.90 - 2.15) | 1.33 X 10 <sup>-01</sup> | 0.87 (0.63 - 1.21) | 4.03 X 10 <sup>-01</sup> |
| rs6428992  | 1 | 233583691 | RYR2  | Intron   | 0.99 | 8.84E-01 | A | G | 0.78 (0.56 - 1.08) | 1.32 X 10 <sup>-01</sup> | 0.83 (0.64 - 1.08) | 1.72 X 10 <sup>-01</sup> |
| rs12131634 | 1 | 233583865 | RYR2  | Intron   | 0.98 | 3.01E-02 | C | T | 1.07 (0.70 - 1.62) | 7.67 X 10 <sup>-01</sup> | 1.07 (0.78 - 1.49) | 6.87 X 10 <sup>-01</sup> |
| rs7554607  | 1 | 233592644 | RYR2  | Intron   | 0.99 | 8.44E-01 | A | G | 1.09 (0.77 - 1.52) | 6.37 X 10 <sup>-01</sup> | 0.99 (0.76 - 1.28) | 9.15 X 10 <sup>-01</sup> |
| rs6696837  | 1 | 233595475 | RYR2  | Intron   | 0.98 | 7.71E-01 | G | T | 0.70 (0.50 - 0.98) | 3.92 X 10 <sup>-02</sup> | 0.88 (0.67 - 1.14) | 3.24 X 10 <sup>-01</sup> |
| rs6703352  | 1 | 233597019 | RYR2  | Intron   | 0.99 | 5.67E-03 | C | T | 0.93 (0.64 - 1.34) | 6.95 X 10 <sup>-01</sup> | 1.01 (0.74 - 1.36) | 9.66 X 10 <sup>-01</sup> |
| rs2485579  | 1 | 233597673 | RYR2  | Intron   | 0.98 | 1.47E-06 | A | G | 1.20 (0.79 - 1.83) | 3.93 X 10 <sup>-01</sup> | 1.23 (0.87 - 1.74) | 2.33 X 10 <sup>-01</sup> |
| rs1415714  | 1 | 233598066 | RYR2  | Intron   | 0.99 | 7.66E-01 | C | T | 0.88 (0.62 - 1.26) | 4.95 X 10 <sup>-01</sup> | 0.94 (0.70 - 1.26) | 6.68 X 10 <sup>-01</sup> |
| rs1980798  | 1 | 233598180 | RYR2  | Intron   | 0.98 | 1.43E-01 | G | T | 0.90 (0.66 - 1.23) | 5.23 X 10 <sup>-01</sup> | 0.92 (0.71 - 1.19) | 5.33 X 10 <sup>-01</sup> |
| rs10925315 | 1 | 233598425 | RYR2  | Intron   | 0.97 | 1.31E-02 | G | T | 0.83 (0.60 - 1.15) | 2.65 X 10 <sup>-01</sup> | 0.94 (0.73 - 1.22) | 6.58 X 10 <sup>-01</sup> |
| rs2485598  | 1 | 233600060 | RYR2  | Intron   | 0.98 | 4.60E-01 | C | T | 0.97 (0.68 - 1.39) | 8.81 X 10 <sup>-01</sup> | 1.01 (0.76 - 1.35) | 9.30 X 10 <sup>-01</sup> |
| rs11583937 | 1 | 233601435 | RYR2  | Intron   | 0.98 | 3.97E-02 | A | G | 0.86 (0.56 - 1.31) | 4.75 X 10 <sup>-01</sup> | 1.00 (0.71 - 1.42) | 9.96 X 10 <sup>-01</sup> |
| rs4659769  | 1 | 233601512 | RYR2  | Intron   | 0.99 | 3.38E-01 | C | T | 0.99 (0.70 - 1.40) | 9.63 X 10 <sup>-01</sup> | 1.08 (0.82 - 1.43) | 5.85 X 10 <sup>-01</sup> |
| rs2490385  | 1 | 233609012 | RYR2  | Intron   | 0.96 | 1.51E-02 | A | G | 0.86 (0.62 - 1.19) | 3.56 X 10 <sup>-01</sup> | 0.99 (0.75 - 1.31) | 9.67 X 10 <sup>-01</sup> |
| rs10737813 | 1 | 233622272 | RYR2  | Intron   | 0.99 | 4.83E-01 | A | G | 0.96 (0.69 - 1.34) | 8.21 X 10 <sup>-01</sup> | 1.02 (0.78 - 1.33) | 8.88 X 10 <sup>-01</sup> |
| rs2490372  | 1 | 233630853 | RYR2  | Intron   | 0.97 | 6.99E-01 | C | T | 0.99 (0.71 - 1.38) | 9.57 X 10 <sup>-01</sup> | 1.05 (0.80 - 1.38) | 7.47 X 10 <sup>-01</sup> |

|            |   |           |      |        |      |          |   |   |                    |                          |                    |                          |
|------------|---|-----------|------|--------|------|----------|---|---|--------------------|--------------------------|--------------------|--------------------------|
| rs1555834  | 1 | 233658357 | RYR2 | Intron | 0.97 | 9.74E-02 | C | G | 0.95 (0.69 - 1.31) | 7.62 X 10 <sup>-01</sup> | 0.92 (0.71 - 1.19) | 5.29 X 10 <sup>-01</sup> |
| rs1110246  | 1 | 233659418 | RYR2 | Intron | 0.98 | 3.63E-01 | A | G | 0.84 (0.60 - 1.17) | 2.99 X 10 <sup>-01</sup> | 0.96 (0.73 - 1.26) | 7.65 X 10 <sup>-01</sup> |
| rs2490351  | 1 | 233669168 | RYR2 | Intron | 0.98 | 4.46E-01 | C | T | 0.95 (0.69 - 1.31) | 7.48 X 10 <sup>-01</sup> | 1.02 (0.78 - 1.34) | 8.67 X 10 <sup>-01</sup> |
| rs9730301  | 1 | 233670685 | RYR2 | Intron | 0.98 | 7.81E-04 | A | G | 1.37 (0.80 - 2.36) | 2.53 X 10 <sup>-01</sup> | 1.18 (0.78 - 1.78) | 4.26 X 10 <sup>-01</sup> |
| rs4659774  | 1 | 233680465 | RYR2 | Intron | 0.97 | 1.41E-11 | A | G | 0.86 (0.55 - 1.32) | 4.82 X 10 <sup>-01</sup> | 1.21 (0.82 - 1.79) | 3.30 X 10 <sup>-01</sup> |
| rs1421211  | 1 | 233680980 | RYR2 | Intron | 0.98 | 6.05E-03 | A | G | 1.27 (0.77 - 2.07) | 3.47 X 10 <sup>-01</sup> | 1.35 (0.89 - 2.05) | 1.57 X 10 <sup>-01</sup> |
| rs1765887  | 1 | 233683053 | RYR2 | Intron | 0.98 | 2.38E-01 | C | T | 0.77 (0.48 - 1.24) | 2.84 X 10 <sup>-01</sup> | 0.91 (0.60 - 1.38) | 6.66 X 10 <sup>-01</sup> |
| rs12729522 | 1 | 233687915 | RYR2 | Intron | 0.98 | 9.19E-01 | C | T | 0.70 (0.50 - 0.96) | 2.89 X 10 <sup>-02</sup> | 0.82 (0.62 - 1.07) | 1.49 X 10 <sup>-01</sup> |
| rs637520   | 1 | 233695325 | RYR2 | Intron | 0.98 | 4.64E-01 | C | T | 1.26 (0.91 - 1.72) | 1.61 X 10 <sup>-01</sup> | 1.04 (0.80 - 1.34) | 7.66 X 10 <sup>-01</sup> |
| rs628414   | 1 | 233699278 | RYR2 | Intron | 0.99 | 3.29E-02 | A | G | 0.66 (0.44 - 0.98) | 4.11 X 10 <sup>-02</sup> | 1.01 (0.70 - 1.46) | 9.46 X 10 <sup>-01</sup> |
| rs2111736  | 1 | 233700879 | RYR2 | Intron | 0.98 | 3.26E-01 | A | C | 0.85 (0.60 - 1.20) | 3.53 X 10 <sup>-01</sup> | 1.00 (0.75 - 1.34) | 9.81 X 10 <sup>-01</sup> |
| rs618083   | 1 | 233701198 | RYR2 | Intron | 0.97 | 5.51E-01 | G | T | 1.13 (0.83 - 1.55) | 4.46 X 10 <sup>-01</sup> | 0.96 (0.75 - 1.24) | 7.64 X 10 <sup>-01</sup> |
| rs2152884  | 1 | 233704196 | RYR2 | Intron | 0.98 | 7.11E-01 | A | G | 1.04 (0.73 - 1.47) | 8.38 X 10 <sup>-01</sup> | 1.10 (0.82 - 1.46) | 5.37 X 10 <sup>-01</sup> |
| rs8663087  | 1 | 233705146 | RYR2 | Intron | 0.98 | 2.22E-01 | G | T | 1.15 (0.83 - 1.59) | 4.02 X 10 <sup>-01</sup> | 1.04 (0.80 - 1.35) | 7.57 X 10 <sup>-01</sup> |
| rs17626494 | 1 | 233709312 | RYR2 | Intron | 0.96 | 3.65E-01 | A | G | 1.06 (0.70 - 1.61) | 7.76 X 10 <sup>-01</sup> | 0.98 (0.70 - 1.36) | 8.93 X 10 <sup>-01</sup> |
| rs6683160  | 1 | 233716773 | RYR2 | Intron | 0.98 | 9.13E-01 | A | C | 0.92 (0.66 - 1.29) | 6.26 X 10 <sup>-01</sup> | 0.95 (0.73 - 1.25) | 7.18 X 10 <sup>-01</sup> |
| rs10802592 | 1 | 233722023 | RYR2 | Intron | 0.98 | 5.47E-01 | A | G | 0.82 (0.58 - 1.15) | 2.43 X 10 <sup>-01</sup> | 0.95 (0.73 - 1.24) | 7.26 X 10 <sup>-01</sup> |
| rs1345498  | 1 | 233736112 | RYR2 | Intron | 0.98 | 4.19E-01 | C | T | 1.06 (0.69 - 1.62) | 7.86 X 10 <sup>-01</sup> | 1.14 (0.80 - 1.62) | 4.69 X 10 <sup>-01</sup> |
| rs10925349 | 1 | 233737295 | RYR2 | Intron | 0.99 | 3.74E-01 | A | G | 0.81 (0.59 - 1.11) | 1.89 X 10 <sup>-01</sup> | 0.93 (0.72 - 1.21) | 6.10 X 10 <sup>-01</sup> |
| rs888438   | 1 | 233739333 | RYR2 | Intron | 0.98 | 8.77E-04 | G | T | 0.97 (0.67 - 1.41) | 8.85 X 10 <sup>-01</sup> | 1.10 (0.80 - 1.52) | 5.55 X 10 <sup>-01</sup> |
| rs12133002 | 1 | 233742090 | RYR2 | Intron | 0.96 | 1.80E-01 | A | G | 0.84 (0.61 - 1.15) | 2.74 X 10 <sup>-01</sup> | 0.96 (0.74 - 1.25) | 7.77 X 10 <sup>-01</sup> |
| rs10925354 | 1 | 233745826 | RYR2 | Intron | 0.97 | 3.63E-01 | C | T | 1.22 (0.85 - 1.74) | 2.84 X 10 <sup>-01</sup> | 1.04 (0.78 - 1.38) | 7.92 X 10 <sup>-01</sup> |
| rs10802595 | 1 | 233746335 | RYR2 | Intron | 0.99 | 2.16E-01 | A | G | 1.03 (0.70 - 1.52) | 8.83 X 10 <sup>-01</sup> | 0.92 (0.68 - 1.24) | 5.77 X 10 <sup>-01</sup> |
| rs10495392 | 1 | 233749030 | RYR2 | Intron | 0.98 | 2.82E-01 | C | T | 1.09 (0.67 - 1.78) | 7.22 X 10 <sup>-01</sup> | 1.12 (0.76 - 1.65) | 5.67 X 10 <sup>-01</sup> |
| rs961120   | 1 | 233749248 | RYR2 | Intron | 0.98 | 8.84E-01 | A | C | 0.99 (0.71 - 1.36) | 9.29 X 10 <sup>-01</sup> | 0.97 (0.75 - 1.24) | 7.99 X 10 <sup>-01</sup> |
| rs10158497 | 1 | 233753385 | RYR2 | Intron | 0.98 | 5.22E-01 | A | G | 1.20 (0.83 - 1.73) | 3.44 X 10 <sup>-01</sup> | 1.15 (0.85 - 1.55) | 3.59 X 10 <sup>-01</sup> |
| rs2065985  | 1 | 233753986 | RYR2 | Intron | 0.98 | 3.18E-03 | C | T | 0.92 (0.68 - 1.25) | 5.94 X 10 <sup>-01</sup> | 1.02 (0.79 - 1.30) | 9.03 X 10 <sup>-01</sup> |
| rs1933232  | 1 | 233757795 | RYR2 | Intron | 0.98 | 2.93E-01 | A | G | 0.94 (0.66 - 1.34) | 7.37 X 10 <sup>-01</sup> | 0.90 (0.68 - 1.19) | 4.56 X 10 <sup>-01</sup> |
| rs4233470  | 1 | 233758946 | RYR2 | Intron | 0.98 | 6.67E-01 | C | T | 1.24 (0.74 - 2.10) | 4.18 X 10 <sup>-01</sup> | 0.86 (0.59 - 1.26) | 4.47 X 10 <sup>-01</sup> |
| rs7526874  | 1 | 233760222 | RYR2 | Intron | 0.97 | 8.44E-01 | A | G | 0.87 (0.55 - 1.37) | 5.34 X 10 <sup>-01</sup> | 0.92 (0.64 - 1.33) | 6.52 X 10 <sup>-01</sup> |
| rs1004466  | 1 | 233760751 | RYR2 | Intron | 0.97 | 1.00E+00 | A | C | 0.90 (0.59 - 1.38) | 6.30 X 10 <sup>-01</sup> | 1.02 (0.72 - 1.44) | 9.24 X 10 <sup>-01</sup> |
| rs12046077 | 1 | 233771140 | RYR2 | Intron | 0.98 | 1.39E-01 | C | T | 1.27 (0.87 - 1.84) | 2.13 X 10 <sup>-01</sup> | 0.92 (0.69 - 1.22) | 5.70 X 10 <sup>-01</sup> |
| rs10802596 | 1 | 233772893 | RYR2 | Intron | 0.99 | 8.38E-01 | A | T | 1.40 (0.99 - 1.98) | 6.04 X 10 <sup>-02</sup> | 1.03 (0.79 - 1.34) | 8.08 X 10 <sup>-01</sup> |
| rs1833420  | 1 | 233775486 | RYR2 | Intron | 0.99 | 3.77E-01 | C | T | 0.66 (0.44 - 0.98) | 4.18 X 10 <sup>-02</sup> | 0.96 (0.69 - 1.35) | 8.22 X 10 <sup>-01</sup> |
| rs10802597 | 1 | 233778605 | RYR2 | Intron | 0.99 | 2.23E-01 | C | T | 1.04 (0.75 - 1.45) | 7.97 X 10 <sup>-01</sup> | 0.79 (0.61 - 1.03) | 7.90 X 10 <sup>-02</sup> |
| rs7538075  | 1 | 233781064 | RYR2 | Intron | 0.97 | 1.93E-01 | A | C | 0.98 (0.69 - 1.39) | 8.93 X 10 <sup>-01</sup> | 1.15 (0.87 - 1.53) | 3.16 X 10 <sup>-01</sup> |
| rs7532774  | 1 | 233785803 | RYR2 | Intron | 0.97 | 2.01E-01 | A | G | 0.96 (0.69 - 1.34) | 8.02 X 10 <sup>-01</sup> | 1.24 (0.95 - 1.61) | 1.08 X 10 <sup>-01</sup> |
| rs10802600 | 1 | 233797122 | RYR2 | Intron | 0.98 | 5.09E-01 | C | T | 1.03 (0.73 - 1.44) | 8.79 X 10 <sup>-01</sup> | 1.27 (0.96 - 1.68) | 8.94 X 10 <sup>-02</sup> |
| rs12741336 | 1 | 233801139 | RYR2 | Intron | 0.99 | 6.87E-01 | C | T | 0.88 (0.51 - 1.51) | 6.44 X 10 <sup>-01</sup> | 0.98 (0.64 - 1.49) | 9.10 X 10 <sup>-01</sup> |
| rs974893   | 1 | 233812820 | RYR2 | Intron | 0.99 | 6.55E-01 | G | T | 0.98 (0.70 - 1.38) | 9.25 X 10 <sup>-01</sup> | 1.15 (0.88 - 1.51) | 2.95 X 10 <sup>-01</sup> |
| rs6429005  | 1 | 233823293 | RYR2 | Intron | 0.97 | 6.21E-02 | A | G | 1.20 (0.87 - 1.67) | 2.64 X 10 <sup>-01</sup> | 1.24 (0.95 - 1.62) | 1.18 X 10 <sup>-01</sup> |
| rs2543038  | 1 | 233824527 | RYR2 | Intron | 0.98 | 6.48E-03 | C | T | 1.09 (0.78 - 1.52) | 6.16 X 10 <sup>-01</sup> | 1.24 (0.94 - 1.62) | 1.22 X 10 <sup>-01</sup> |
| rs2050656  | 1 | 233836955 | RYR2 | Intron | 0.98 | 3.37E-01 | A | G | 1.12 (0.68 - 1.83) | 6.64 X 10 <sup>-01</sup> | 0.86 (0.60 - 1.24) | 4.22 X 10 <sup>-01</sup> |
| rs4336842  | 1 | 233846197 | RYR2 | Intron | 0.98 | 1.16E-01 | A | G | 1.27 (0.84 - 1.93) | 2.54 X 10 <sup>-01</sup> | 0.88 (0.64 - 1.21) | 4.26 X 10 <sup>-01</sup> |
| rs7514255  | 1 | 233851456 | RYR2 | Intron | 0.99 | 3.65E-01 | G | T | 1.03 (0.72 - 1.46) | 8.89 X 10 <sup>-01</sup> | 0.92 (0.70 - 1.22) | 5.69 X 10 <sup>-01</sup> |
| rs16835174 | 1 | 233857062 | RYR2 | Intron | 0.97 | 2.18E-02 | G | T | 1.02 (0.72 - 1.45) | 9.04 X 10 <sup>-01</sup> | 0.86 (0.64 - 1.15) | 3.00 X 10 <sup>-01</sup> |
| rs10925391 | 1 | 233866656 | RYR2 | Intron | 0.97 | 3.41E-01 | A | C | 1.18 (0.81 - 1.72) | 3.78 X 10 <sup>-01</sup> | 1.09 (0.81 - 1.47) | 5.57 X 10 <sup>-01</sup> |
| rs17682073 | 1 | 233873264 | RYR2 | Intron | 0.98 | 3.99E-01 | A | G | 0.84 (0.60 - 1.18) | 3.16 X 10 <sup>-01</sup> | 0.83 (0.63 - 1.09) | 1.74 X 10 <sup>-01</sup> |
| rs11583145 | 1 | 233873396 | RYR2 | Intron | 0.97 | 9.23E-01 | C | T | 1.15 (0.71 - 1.86) | 5.69 X 10 <sup>-01</sup> | 0.93 (0.65 - 1.33) | 6.94 X 10 <sup>-01</sup> |
| rs10754601 | 1 | 233876137 | RYR2 | Intron | 0.98 | 2.24E-01 | A | G | 1.40 (0.99 - 1.99) | 5.47 X 10 <sup>-02</sup> | 1.41 (1.08 - 1.84) | 1.20 X 10 <sup>-02</sup> |
| rs4233471  | 1 | 233880230 | RYR2 | Intron | 0.98 | 3.31E-01 | A | G | 1.25 (0.90 - 1.75) | 1.88 X 10 <sup>-01</sup> | 1.13 (0.87 - 1.47) | 3.57 X 10 <sup>-01</sup> |
| rs10925401 | 1 | 233883171 | RYR2 | Intron | 0.96 | 5.21E-01 | C | T | 0.90 (0.65 - 1.26) | 5.48 X 10 <sup>-01</sup> | 1.12 (0.86 - 1.47) | 4.11 X 10 <sup>-01</sup> |
| rs4393145  | 1 | 233883343 | RYR2 | Intron | 0.98 | 3.18E-02 | G | T | 0.86 (0.59 - 1.24) | 4.06 X 10 <sup>-01</sup> | 0.96 (0.72 - 1.29) | 8.06 X 10 <sup>-01</sup> |
| rs12407312 | 1 | 233883948 | RYR2 | Intron | 0.99 | 0.00E+00 | A | G | 0.98 (0.75 - 1.27) | 8.67 X 10 <sup>-01</sup> | 1.03 (0.83 - 1.27) | 8.03 X 10 <sup>-01</sup> |
| rs4659787  | 1 | 233884048 | RYR2 | Intron | 0.98 | 3.59E-02 | C | T | 0.69 (0.48 - 1.01) | 5.70 X 10 <sup>-02</sup> | 0.88 (0.64 - 1.19) | 4.02 X 10 <sup>-01</sup> |
| rs4531285  | 1 | 233892266 | RYR2 | Intron | 0.96 | 2.87E-01 | C | T | 0.79 (0.56 - 1.12) | 1.93 X 10 <sup>-01</sup> | 0.88 (0.66 - 1.17) | 3.79 X 10 <sup>-01</sup> |
| rs10737816 | 1 | 233898957 | RYR2 | Intron | 0.97 | 4.82E-01 | A | C | 1.56 (1.09 - 2.21) | 1.44 X 10 <sup>-02</sup> | 1.13 (0.86 - 1.49) | 3.85 X 10 <sup>-01</sup> |
| rs10754603 | 1 | 233903779 | RYR2 | Intron | 0.97 | 4.32E-01 | C | T | 0.81 (0.49 - 1.34) | 4.05 X 10 <sup>-01</sup> | 0.83 (0.55 - 1.24) | 3.56 X 10 <sup>-01</sup> |
| rs17631862 | 1 | 233904249 | RYR2 | Intron | 0.99 | 8.42E-01 | C | T | 0.95 (0.68 - 1.33) | 7.66 X 10 <sup>-01</sup> | 1.04 (0.80 - 1.35) | 7.94 X 10 <sup>-01</sup> |
| rs12145251 | 1 | 233904596 | RYR2 | Intron | 0.99 | 8.94E-01 | A | G | 1.16 (0.80 - 1.69) | 4.38 X 10 <sup>-01</sup> | 1.12 (0.83 - 1.51) | 4.61 X 10 <sup>-01</sup> |
| rs4633277  | 1 | 233908030 | RYR2 | Intron | 0.96 | 4.05E-02 | C | T | 0.76 (0.52 - 1.11) | 1.58 X 10 <sup>-01</sup> | 0.79 (0.57 - 1.09) | 1.44 X 10 <sup>-01</sup> |
| rs16835237 | 1 | 233912425 | RYR2 | Intron | 0.98 | 1.97E-01 | A | T | 1.23 (0.71 - 2.10) | 4.61 X 10 <sup>-01</sup> | 1.32 (0.85 - 2.04) | 2.14 X 10 <sup>-01</sup> |
| rs7528353  | 1 | 233914506 | RYR2 | Intron | 0.94 | 5.52E-01 | C | T | 0.82 (0.59 - 1.14) | 2.43 X 10 <sup>-01</sup> | 1.02 (0.79 - 1.31) | 9.04 X 10 <sup>-01</sup> |
| rs6674675  | 1 | 233915474 | RYR2 | Intron | 0.97 | 3.96E-01 | A | G | 0.74 (0.52 - 1.05) | 9.34 X 10 <sup>-02</sup> | 0.84 (0.63 - 1.11) | 2.17 X 10 <sup>-01</sup> |

|             |   |           |      |        |      |          |   |   |                    |                          |                    |                          |
|-------------|---|-----------|------|--------|------|----------|---|---|--------------------|--------------------------|--------------------|--------------------------|
| rs4376723   | 1 | 233921506 | RYR2 | Intron | 0.97 | 1.38E-01 | G | T | 0.81 (0.56 - 1.17) | 2.59 X 10 <sup>-01</sup> | 1.01 (0.75 - 1.34) | 9.67 X 10 <sup>-01</sup> |
| rs7552945   | 1 | 233921733 | RYR2 | Intron | 0.98 | 6.64E-02 | C | T | 1.28 (0.74 - 2.21) | 3.80 X 10 <sup>-01</sup> | 1.24 (0.82 - 1.88) | 3.16 X 10 <sup>-01</sup> |
| rs4272613   | 1 | 233921914 | RYR2 | Intron | 0.98 | 2.68E-01 | A | T | 0.76 (0.50 - 1.16) | 2.03 X 10 <sup>-01</sup> | 0.96 (0.68 - 1.35) | 8.09 X 10 <sup>-01</sup> |
| rs12038715  | 1 | 233923204 | RYR2 | Intron | 0.98 | 3.82E-01 | C | T | 0.94 (0.69 - 1.29) | 7.05 X 10 <sup>-01</sup> | 0.95 (0.74 - 1.23) | 7.14 X 10 <sup>-01</sup> |
| rs7537614   | 1 | 233923350 | RYR2 | Intron | 0.98 | 4.00E-01 | A | G | 1.30 (0.90 - 1.89) | 1.60 X 10 <sup>-01</sup> | 1.11 (0.82 - 1.49) | 5.12 X 10 <sup>-01</sup> |
| rs11803630  | 1 | 233925487 | RYR2 | Intron | 0.98 | 8.14E-01 | A | G | 1.23 (0.86 - 1.74) | 2.56 X 10 <sup>-01</sup> | 1.01 (0.76 - 1.34) | 9.49 X 10 <sup>-01</sup> |
| rs12754712  | 1 | 233925650 | RYR2 | Intron | 0.96 | 3.67E-02 | C | G | 0.99 (0.73 - 1.34) | 9.30 X 10 <sup>-01</sup> | 1.06 (0.82 - 1.37) | 6.57 X 10 <sup>-01</sup> |
| rs2997967   | 1 | 233927308 | RYR2 | Intron | 0.97 | 1.00E+00 | A | G | 0.76 (0.53 - 1.10) | 1.43 X 10 <sup>-01</sup> | 0.94 (0.70 - 1.27) | 6.99 X 10 <sup>-01</sup> |
| rs6429017   | 1 | 233940822 | RYR2 | Intron | 0.98 | 1.00E+00 | C | T | 0.98 (0.71 - 1.36) | 9.06 X 10 <sup>-01</sup> | 0.96 (0.73 - 1.25) | 7.60 X 10 <sup>-01</sup> |
| rs1842082   | 1 | 233951526 | RYR2 | Intron | 0.97 | 9.22E-01 | C | G | 1.05 (0.77 - 1.44) | 7.46 X 10 <sup>-01</sup> | 0.95 (0.73 - 1.24) | 7.22 X 10 <sup>-01</sup> |
| rs2618679   | 1 | 233953539 | RYR2 | Intron | 0.96 | 6.67E-01 | A | G | 1.00 (0.63 - 1.59) | 9.99 X 10 <sup>-01</sup> | 0.81 (0.56 - 1.17) | 2.63 X 10 <sup>-01</sup> |
| rs2618681   | 1 | 233960987 | RYR2 | Intron | 0.99 | 2.03E-01 | A | G | 1.19 (0.82 - 1.73) | 3.62 X 10 <sup>-01</sup> | 1.10 (0.82 - 1.49) | 5.17 X 10 <sup>-01</sup> |
| rs12117452  | 1 | 233973323 | RYR2 | Intron | 0.96 | 4.79E-01 | A | G | 0.90 (0.62 - 1.32) | 6.03 X 10 <sup>-01</sup> | 1.05 (0.78 - 1.40) | 7.66 X 10 <sup>-01</sup> |
| rs12060093  | 1 | 233974262 | RYR2 | Intron | 0.99 | 6.28E-04 | A | G | 1.18 (0.82 - 1.70) | 3.71 X 10 <sup>-01</sup> | 1.12 (0.83 - 1.51) | 4.61 X 10 <sup>-01</sup> |
| rs6673954   | 1 | 233974958 | RYR2 | Intron | 0.98 | 9.54E-01 | A | G | 1.08 (0.75 - 1.55) | 6.78 X 10 <sup>-01</sup> | 1.12 (0.84 - 1.49) | 4.42 X 10 <sup>-01</sup> |
| rs9428668   | 1 | 233975106 | RYR2 | Intron | 0.99 | 7.99E-01 | G | T | 0.90 (0.61 - 1.31) | 5.72 X 10 <sup>-01</sup> | 1.05 (0.78 - 1.41) | 7.59 X 10 <sup>-01</sup> |
| rs4659797   | 1 | 233976330 | RYR2 | Intron | 0.99 | 1.00E+00 | A | G | 0.81 (0.45 - 1.44) | 4.68 X 10 <sup>-01</sup> | 0.94 (0.57 - 1.55) | 8.22 X 10 <sup>-01</sup> |
| rs2127155   | 1 | 233980872 | RYR2 | Intron | 0.99 | 2.41E-02 | G | T | 1.00 (0.73 - 1.37) | 9.95 X 10 <sup>-01</sup> | 0.95 (0.73 - 1.24) | 7.15 X 10 <sup>-01</sup> |
| rs2010032   | 1 | 233984679 | RYR2 | Intron | 0.97 | 1.15E-01 | A | G | 0.89 (0.65 - 1.22) | 4.72 X 10 <sup>-01</sup> | 0.90 (0.69 - 1.17) | 4.39 X 10 <sup>-01</sup> |
| rs2618698   | 1 | 233989798 | RYR2 | Intron | 0.96 | 7.91E-01 | A | G | 0.99 (0.70 - 1.39) | 9.44 X 10 <sup>-01</sup> | 1.28 (0.96 - 1.69) | 8.91 X 10 <sup>-02</sup> |
| rs2997977   | 1 | 233995409 | RYR2 | Intron | 0.99 | 9.17E-01 | A | G | 0.85 (0.61 - 1.19) | 3.49 X 10 <sup>-01</sup> | 1.18 (0.90 - 1.55) | 2.28 X 10 <sup>-01</sup> |
| rs3766841   | 1 | 233999912 | RYR2 | Intron | 0.97 | 4.08E-01 | A | G | 1.38 (0.90 - 2.12) | 1.43 X 10 <sup>-01</sup> | 1.05 (0.75 - 1.46) | 7.91 X 10 <sup>-01</sup> |
| rs2247748   | 1 | 234000477 | RYR2 | Intron | 0.98 | 1.04E-01 | A | G | 0.94 (0.68 - 1.29) | 6.93 X 10 <sup>-01</sup> | 0.82 (0.63 - 1.08) | 1.55 X 10 <sup>-01</sup> |
| rs12035214  | 1 | 234004732 | RYR2 | Intron | 0.97 | 4.32E-01 | C | T | 0.94 (0.67 - 1.32) | 7.22 X 10 <sup>-01</sup> | 1.18 (0.89 - 1.57) | 2.55 X 10 <sup>-01</sup> |
| rs10925438  | 1 | 234005861 | RYR2 | Intron | 0.98 | 3.12E-01 | A | G | 0.90 (0.65 - 1.25) | 5.24 X 10 <sup>-01</sup> | 1.10 (0.83 - 1.44) | 5.16 X 10 <sup>-01</sup> |
| rs2618696   | 1 | 234013590 | RYR2 | Intron | 0.99 | 8.09E-01 | G | T | 1.01 (0.73 - 1.40) | 9.46 X 10 <sup>-01</sup> | 1.11 (0.85 - 1.44) | 4.42 X 10 <sup>-01</sup> |
| rs2618703   | 1 | 234017325 | RYR2 | Intron | 0.97 | 3.40E-01 | C | T | 1.43 (1.00 - 2.06) | 5.19 X 10 <sup>-02</sup> | 1.18 (0.88 - 1.58) | 2.70 X 10 <sup>-01</sup> |
| rs2805445   | 1 | 234018092 | RYR2 | Intron | 0.97 | 1.31E-01 | C | G | 0.99 (0.72 - 1.37) | 9.74 X 10 <sup>-01</sup> | 1.15 (0.88 - 1.50) | 3.16 X 10 <sup>-01</sup> |
| rs2805446   | 1 | 234019231 | RYR2 | Intron | 0.97 | 3.73E-01 | C | T | 1.36 (0.89 - 2.08) | 1.61 X 10 <sup>-01</sup> | 0.96 (0.69 - 1.33) | 7.94 X 10 <sup>-01</sup> |
| rs10925451  | 1 | 234028750 | RYR2 | Intron | 0.98 | 6.08E-01 | A | G | 0.83 (0.58 - 1.19) | 3.11 X 10 <sup>-01</sup> | 1.34 (1.00 - 1.78) | 4.79 X 10 <sup>-02</sup> |
| rs12409861  | 1 | 234028898 | RYR2 | Intron | 0.99 | 2.07E-01 | A | G | 0.81 (0.56 - 1.18) | 2.79 X 10 <sup>-01</sup> | 1.20 (0.89 - 1.62) | 2.29 X 10 <sup>-01</sup> |
| rs2618670   | 1 | 234031975 | RYR2 | Intron | 0.99 | 8.32E-01 | C | G | 1.39 (1.00 - 1.93) | 5.26 X 10 <sup>-02</sup> | 1.01 (0.77 - 1.31) | 9.58 X 10 <sup>-01</sup> |
| rs2306238   | 1 | 234040144 | RYR2 | Intron | 0.97 | 8.29E-01 | C | T | 0.80 (0.54 - 1.17) | 2.43 X 10 <sup>-01</sup> | 1.37 (1.01 - 1.87) | 4.51 X 10 <sup>-02</sup> |
| rs2805465   | 1 | 234045218 | RYR2 | Intron | 0.99 | 7.62E-01 | G | T | 0.94 (0.68 - 1.30) | 6.92 X 10 <sup>-01</sup> | 0.84 (0.63 - 1.10) | 2.02 X 10 <sup>-01</sup> |
| rs2805468   | 1 | 234047152 | RYR2 | Intron | 0.98 | 1.04E-01 | C | G | 0.92 (0.66 - 1.30) | 6.47 X 10 <sup>-01</sup> | 1.44 (1.10 - 1.89) | 8.98 X 10 <sup>-03</sup> |
| rs2061840   | 1 | 234050385 | RYR2 | Intron | 0.99 | 3.34E-01 | A | T | 0.61 (0.34 - 1.07) | 8.44 X 10 <sup>-02</sup> | 0.90 (0.54 - 1.49) | 6.76 X 10 <sup>-01</sup> |
| rs722582    | 1 | 234051975 | RYR2 | Intron | 0.98 | 9.52E-01 | A | G | 1.08 (0.76 - 1.53) | 6.64 X 10 <sup>-01</sup> | 0.85 (0.64 - 1.13) | 2.63 X 10 <sup>-01</sup> |
| rs1031862   | 1 | 234054011 | RYR2 | Intron | 0.99 | 1.56E-01 | A | G | 1.14 (0.83 - 1.56) | 4.13 X 10 <sup>-01</sup> | 1.07 (0.82 - 1.38) | 6.22 X 10 <sup>-01</sup> |
| RYR2_A1136V | 1 | 234056100 | RYR2 |        | 0.99 | 1.00E+00 |   |   | 0.81 (0.28 - 2.34) | 6.92 X 10 <sup>-01</sup> | 1.84 (0.72 - 4.74) | 2.06 X 10 <sup>-01</sup> |
| rs1842084   | 1 | 234070907 | RYR2 | Intron | 0.98 | 3.91E-01 | A | G | 1.02 (0.72 - 1.46) | 8.95 X 10 <sup>-01</sup> | 1.00 (0.75 - 1.34) | 9.82 X 10 <sup>-01</sup> |
| rs6429026   | 1 | 234077137 | RYR2 | Intron | 0.98 | 5.61E-01 | C | G | 0.84 (0.61 - 1.16) | 2.87 X 10 <sup>-01</sup> | 1.08 (0.84 - 1.39) | 5.40 X 10 <sup>-01</sup> |
| rs12116442  | 1 | 234097617 | RYR2 | Intron | 0.98 | 6.51E-01 | A | G | 1.01 (0.68 - 1.49) | 9.67 X 10 <sup>-01</sup> | 0.89 (0.64 - 1.23) | 4.66 X 10 <sup>-01</sup> |
| rs1717783   | 1 | 234099468 | RYR2 | Intron | 0.98 | 2.89E-01 | A | G | 0.87 (0.63 - 1.20) | 3.81 X 10 <sup>-01</sup> | 1.11 (0.85 - 1.44) | 4.43 X 10 <sup>-01</sup> |
| rs10925473  | 1 | 234099658 | RYR2 | Intron | 0.98 | 4.60E-01 | C | T | 1.15 (0.80 - 1.65) | 4.59 X 10 <sup>-01</sup> | 0.94 (0.70 - 1.27) | 6.85 X 10 <sup>-01</sup> |
| rs12121663  | 1 | 234100655 | RYR2 | Intron | 0.99 | 7.72E-01 | C | T | 0.99 (0.73 - 1.35) | 9.47 X 10 <sup>-01</sup> | 0.86 (0.66 - 1.12) | 2.61 X 10 <sup>-01</sup> |
| rs3766871   | 1 | 234104125 | RYR2 | Exon   | 0.97 | 8.52E-39 | A | G | 1.16 (0.64 - 2.12) | 6.19 X 10 <sup>-01</sup> | 1.94 (1.10 - 3.44) | 2.30 X 10 <sup>-02</sup> |
| rs596502    | 1 | 234104950 | RYR2 | Intron | 0.95 | 1.52E-02 | C | T | 1.50 (1.03 - 2.17) | 3.51 X 10 <sup>-02</sup> | 1.54 (1.14 - 2.08) | 4.65 X 10 <sup>-03</sup> |
| rs6429031   | 1 | 234112203 | RYR2 | Intron | 0.98 | 3.86E-01 | C | G | 1.23 (0.77 - 1.97) | 3.94 X 10 <sup>-01</sup> | 1.13 (0.77 - 1.66) | 5.25 X 10 <sup>-01</sup> |
| rs512336    | 1 | 234115358 | RYR2 | Intron | 0.98 | 8.25E-01 | C | T | 1.68 (1.03 - 2.72) | 3.64 X 10 <sup>-02</sup> | 1.40 (0.97 - 2.02) | 7.27 X 10 <sup>-02</sup> |
| rs939698    | 1 | 234116721 | RYR2 | Intron | 0.98 | 1.00E+00 | A | G | 1.34 (0.90 - 2.00) | 1.52 X 10 <sup>-01</sup> | 1.36 (1.00 - 1.87) | 5.31 X 10 <sup>-02</sup> |
| rs12123043  | 1 | 234120162 | RYR2 | Intron | 0.98 | 5.85E-01 | A | G | 1.35 (0.98 - 1.88) | 6.96 X 10 <sup>-02</sup> | 1.37 (1.04 - 1.79) | 2.47 X 10 <sup>-02</sup> |
| rs1759123   | 1 | 234120644 | RYR2 | Intron | 0.98 | 9.53E-01 | C | T | 1.25 (0.88 - 1.77) | 2.06 X 10 <sup>-01</sup> | 1.31 (0.98 - 1.75) | 6.46 X 10 <sup>-02</sup> |
| rs10925478  | 1 | 234122800 | RYR2 | Intron | 0.97 | 3.03E-01 | C | G | 1.28 (0.82 - 2.00) | 2.73 X 10 <sup>-01</sup> | 1.02 (0.72 - 1.45) | 9.18 X 10 <sup>-01</sup> |
| rs10802626  | 1 | 234122878 | RYR2 | Intron | 0.98 | 4.56E-03 | A | G | 1.59 (1.11 - 2.27) | 1.16 X 10 <sup>-02</sup> | 1.38 (1.04 - 1.82) | 2.51 X 10 <sup>-02</sup> |
| rs1029088   | 1 | 234129846 | RYR2 | Intron | 0.98 | 6.42E-01 | A | C | 1.40 (0.93 - 2.12) | 1.04 X 10 <sup>-01</sup> | 1.16 (0.85 - 1.58) | 3.39 X 10 <sup>-01</sup> |
| rs6429033   | 1 | 234132377 | RYR2 | Intron | 0.99 | 1.41E-01 | A | G | 1.33 (0.94 - 1.88) | 1.02 X 10 <sup>-01</sup> | 1.42 (1.08 - 1.86) | 1.12 X 10 <sup>-02</sup> |
| rs3766878   | 1 | 234136054 | RYR2 | Intron | 0.97 | 1.35E-01 | A | G | 1.14 (0.78 - 1.66) | 4.90 X 10 <sup>-01</sup> | 1.22 (0.90 - 1.65) | 1.91 X 10 <sup>-01</sup> |
| rs490987    | 1 | 234138608 | RYR2 | Intron | 0.99 | 5.74E-02 | C | T | 1.37 (0.98 - 1.91) | 6.85 X 10 <sup>-02</sup> | 1.30 (1.00 - 1.70) | 5.09 X 10 <sup>-02</sup> |
| rs1342834   | 1 | 234149517 | RYR2 | Intron | 0.97 | 3.53E-03 | C | T | 1.38 (0.91 - 2.10) | 1.33 X 10 <sup>-01</sup> | 1.09 (0.79 - 1.51) | 6.06 X 10 <sup>-01</sup> |
| rs6657332   | 1 | 234156936 | RYR2 | Intron | 0.98 | 1.95E-01 | G | T | 0.73 (0.53 - 1.02) | 6.11 X 10 <sup>-02</sup> | 1.01 (0.77 - 1.31) | 9.58 X 10 <sup>-01</sup> |
| rs2012813   | 1 | 234160742 | RYR2 | Intron | 0.97 | 1.44E-01 | C | T | 0.75 (0.54 - 1.05) | 9.16 X 10 <sup>-02</sup> | 0.96 (0.73 - 1.25) | 7.40 X 10 <sup>-01</sup> |
| rs6662515   | 1 | 234166941 | RYR2 | Intron | 0.97 | 6.40E-01 | A | G | 0.74 (0.52 - 1.04) | 8.58 X 10 <sup>-02</sup> | 0.77 (0.58 - 1.04) | 8.85 X 10 <sup>-02</sup> |
| rs1464459   | 1 | 234171124 | RYR2 | Intron | 0.98 | 7.33E-01 | A | C | 1.33 (0.90 - 1.96) | 1.50 X 10 <sup>-01</sup> | 1.17 (0.87 - 1.59) | 3.01 X 10 <sup>-01</sup> |
| RYR2_Q2958R | 1 | 234176431 | RYR2 |        | 0.97 | 7.68E-01 |   |   | 0.89 (0.62 - 1.27) | 5.24 X 10 <sup>-01</sup> | 0.80 (0.59 - 1.09) | 1.55 X 10 <sup>-01</sup> |

|            |   |           |        |            |      |          |   |   |                    |                          |                    |                         |
|------------|---|-----------|--------|------------|------|----------|---|---|--------------------|--------------------------|--------------------|-------------------------|
| rs10925494 | 1 | 234178182 | RYR2   | Intron     | 0.97 | 4.63E-01 | G | T | 0.66 (0.47 - 0.92) | 1.36 X 10 <sup>-02</sup> | 0.91 (0.69 - 1.20) | 5.04 X 10 <sup>01</sup> |
| rs12028693 | 1 | 234185655 | RYR2   | Intron     | 0.98 | 3.12E-01 | A | G | 1.24 (0.88 - 1.76) | 2.18 X 10 <sup>01</sup>  | 0.94 (0.70 - 1.24) | 6.47 X 10 <sup>01</sup> |
| rs4427395  | 1 | 234188628 | RYR2   | Intron     | 0.97 | 1.72E-01 | A | G | 1.17 (0.84 - 1.63) | 3.43 X 10 <sup>01</sup>  | 1.54 (1.17 - 2.03) | 2.18 X 10 <sup>03</sup> |
| rs12040571 | 1 | 234195745 | RYR2   | Intron     | 0.98 | 6.29E-01 | A | C | 1.14 (0.82 - 1.58) | 4.27 X 10 <sup>01</sup>  | 1.43 (1.09 - 1.88) | 1.05 X 10 <sup>02</sup> |
| rs3766884  | 1 | 234202329 | RYR2   | Intron     | 0.99 | 1.00E+00 | C | T | 1.59 (1.07 - 2.38) | 2.30 X 10 <sup>-02</sup> | 1.78 (1.29 - 2.45) | 4.06 X 10 <sup>04</sup> |
| rs2794442  | 1 | 234209269 | RYR2   | Intron     | 0.98 | 8.22E-01 | A | G | 1.12 (0.79 - 1.61) | 5.20 X 10 <sup>01</sup>  | 0.88 (0.66 - 1.16) | 3.65 X 10 <sup>01</sup> |
| rs2819774  | 1 | 234214896 | RYR2   | Intron     | 0.99 | 5.17E-01 | A | T | 1.22 (0.88 - 1.70) | 2.28 X 10 <sup>01</sup>  | 1.48 (1.13 - 1.94) | 4.00 X 10 <sup>03</sup> |
| rs939700   | 1 | 234228465 | RYR2   | Intron     | 0.99 | 1.00E+00 | C | T | 1.15 (0.82 - 1.62) | 4.21 X 10 <sup>01</sup>  | 1.28 (0.96 - 1.71) | 8.93 X 10 <sup>02</sup> |
| rs2685298  | 1 | 234233225 | RYR2   | Intron     | 0.94 | 1.00E+00 | G | T | 1.31 (0.90 - 1.91) | 1.63 X 10 <sup>-01</sup> | 0.94 (0.70 - 1.26) | 6.88 X 10 <sup>01</sup> |
| rs2797449  | 1 | 234234992 | RYR2   | Intron     | 0.98 | 7.21E-01 | A | G | 1.08 (0.79 - 1.49) | 6.27 X 10 <sup>01</sup>  | 1.07 (0.82 - 1.40) | 6.20 X 10 <sup>01</sup> |
| rs2253831  | 1 | 234249094 | RYR2   | Intron     | 0.98 | 6.57E-01 | C | T | 0.68 (0.48 - 0.96) | 2.67 X 10 <sup>-02</sup> | 0.75 (0.57 - 1.00) | 4.65 X 10 <sup>02</sup> |
| rs6699085  | 1 | 234250030 | RYR2   | Intron     | 0.99 | 7.19E-01 | A | G | 0.67 (0.41 - 1.10) | 1.12 X 10 <sup>01</sup>  | 0.87 (0.56 - 1.34) | 5.22 X 10 <sup>01</sup> |
| rs2819762  | 1 | 234250085 | RYR2   | Intron     | 0.95 | 2.92E-01 | A | G | 1.49 (1.05 - 2.12) | 2.71 X 10 <sup>-02</sup> | 1.19 (0.90 - 1.56) | 2.18 X 10 <sup>01</sup> |
| rs1357150  | 1 | 234251858 | RYR2   | Intron     | 0.99 | 7.68E-01 | A | G | 1.00 (0.73 - 1.36) | 9.76 X 10 <sup>01</sup>  | 1.17 (0.90 - 1.52) | 2.30 X 10 <sup>01</sup> |
| rs1949665  | 1 | 234253381 | RYR2   | Intron     | 0.98 | 4.14E-01 | C | T | 0.67 (0.48 - 0.94) | 1.99 X 10 <sup>-02</sup> | 0.87 (0.66 - 1.14) | 3.08 X 10 <sup>01</sup> |
| rs2250079  | 1 | 234257135 | RYR2   | Intron     | 0.98 | 7.32E-01 | C | T | 1.27 (0.92 - 1.74) | 1.48 X 10 <sup>-01</sup> | 1.17 (0.90 - 1.51) | 2.42 X 10 <sup>01</sup> |
| rs2249287  | 1 | 234263915 | RYR2   | Intron     | 0.98 | 3.37E-01 | C | T | 0.54 (0.36 - 0.83) | 4.30 X 10 <sup>-03</sup> | 0.67 (0.47 - 0.96) | 2.86 X 10 <sup>02</sup> |
| rs11584594 | 1 | 234265157 | RYR2   | Intron     | 0.98 | 8.22E-01 | A | G | 1.56 (1.09 - 2.24) | 1.65 X 10 <sup>-02</sup> | 1.06 (0.80 - 1.39) | 7.03 X 10 <sup>01</sup> |
| rs12135982 | 1 | 234270855 | RYR2   | Intron     | 0.99 | 4.63E-01 | C | T | 0.86 (0.53 - 1.40) | 5.39 X 10 <sup>-01</sup> | 1.42 (0.92 - 2.19) | 1.12 X 10 <sup>01</sup> |
| rs790889   | 1 | 234273005 | RYR2   | Intron     | 0.97 | 2.82E-01 | C | T | 1.13 (0.81 - 1.58) | 4.81 X 10 <sup>01</sup>  | 1.16 (0.88 - 1.53) | 2.84 X 10 <sup>01</sup> |
| rs1773471  | 1 | 234276472 | RYR2   | Intron     | 0.98 | 7.98E-01 | A | G | 1.22 (0.89 - 1.68) | 2.18 X 10 <sup>01</sup>  | 1.20 (0.92 - 1.58) | 1.81 X 10 <sup>01</sup> |
| rs1341870  | 1 | 234278567 | RYR2   | Intron     | 0.98 | 2.28E-01 | A | G | 1.30 (0.93 - 1.80) | 1.23 X 10 <sup>-01</sup> | 1.29 (0.99 - 1.67) | 6.23 X 10 <sup>02</sup> |
| rs790903   | 1 | 234282682 | RYR2   | Intron     | 0.98 | 2.29E-01 | A | G | 1.01 (0.72 - 1.42) | 9.51 X 10 <sup>-01</sup> | 0.86 (0.65 - 1.14) | 2.90 X 10 <sup>01</sup> |
| rs790880   | 1 | 234295783 | RYR2   | Intron     | 0.97 | 9.93E-02 | A | T | 1.32 (0.88 - 1.98) | 1.86 X 10 <sup>01</sup>  | 1.12 (0.81 - 1.55) | 4.88 X 10 <sup>01</sup> |
| rs790888   | 1 | 234304042 | RYR2   | Intron     | 0.97 | 2.66E-01 | C | G | 0.83 (0.61 - 1.15) | 2.63 X 10 <sup>-01</sup> | 0.99 (0.76 - 1.29) | 9.15 X 10 <sup>01</sup> |
| rs2275692  | 1 | 234319765 | RYR2   | Intron     | 0.98 | 1.01E-01 | C | T | 1.14 (0.78 - 1.67) | 5.06 X 10 <sup>-01</sup> | 0.96 (0.71 - 1.31) | 8.05 X 10 <sup>01</sup> |
| rs6429040  | 1 | 234320341 | RYR2   | Intron     | 0.98 | 3.57E-01 | C | T | 1.08 (0.78 - 1.50) | 6.26 X 10 <sup>-01</sup> | 1.12 (0.86 - 1.45) | 3.96 X 10 <sup>01</sup> |
| rs790986   | 1 | 234324017 | RYR2   | Downstream | 0.98 | 2.92E-01 | A | G | 1.52 (1.10 - 2.10) | 1.08 X 10 <sup>-02</sup> | 1.30 (1.01 - 1.68) | 4.43 X 10 <sup>02</sup> |
| rs6700557  | 1 | 234326011 | RYR2   | Downstream | 0.98 | 8.11E-01 | G | T | 0.64 (0.44 - 0.92) | 1.51 X 10 <sup>-02</sup> | 0.79 (0.58 - 1.06) | 1.17 X 10 <sup>01</sup> |
| rs11583227 | 1 | 234336178 | RYR2   | Intron     | 0.98 | 3.50E-01 | A | G | 1.46 (1.04 - 2.04) | 3.04 X 10 <sup>-02</sup> | 1.06 (0.81 - 1.38) | 6.89 X 10 <sup>01</sup> |
| rs1416798  | 1 | 234337001 | RYR2   | Intron     | 0.98 | 5.76E-01 | G | T | 0.90 (0.63 - 1.28) | 5.49 X 10 <sup>-01</sup> | 0.95 (0.72 - 1.26) | 7.21 X 10 <sup>01</sup> |
| rs7513638  | 1 | 234339865 | RYR2   | Intron     | 0.98 | 5.53E-02 | C | T | 0.86 (0.56 - 1.32) | 4.86 X 10 <sup>-01</sup> | 0.99 (0.69 - 1.41) | 9.38 X 10 <sup>01</sup> |
| rs2819751  | 1 | 234341564 | RYR2   | Intron     | 0.98 | 6.77E-01 | A | C | 1.08 (0.76 - 1.53) | 6.62 X 10 <sup>-01</sup> | 1.11 (0.83 - 1.50) | 4.74 X 10 <sup>01</sup> |
| rs16835956 | 1 | 234354541 | RYR2   | Intron     | 0.98 | 6.59E-02 | C | T | 0.98 (0.66 - 1.46) | 9.24 X 10 <sup>-01</sup> | 1.03 (0.75 - 1.40) | 8.73 X 10 <sup>01</sup> |
| rs6696783  | 1 | 234358535 | RYR2   | Intron     | 0.98 | 9.90E-02 | A | G | 1.07 (0.76 - 1.51) | 6.85 X 10 <sup>-01</sup> | 1.08 (0.82 - 1.41) | 5.77 X 10 <sup>01</sup> |
| rs2790363  | 1 | 234369092 | RYR2   | Intron     | 0.99 | 3.59E-01 | C | G | 1.00 (0.59 - 1.69) | 9.88 X 10 <sup>-01</sup> | 0.88 (0.56 - 1.37) | 5.66 X 10 <sup>01</sup> |
| rs1341874  | 1 | 234365581 | RYR2   | Downstream | 0.99 | 1.09E-01 | C | T | 0.96 (0.57 - 1.64) | 8.94 X 10 <sup>-01</sup> | 0.86 (0.55 - 1.32) | 4.82 X 10 <sup>01</sup> |
| rs2487789  | 1 | 234372644 | RYR2   | Intron     | 0.96 | 2.30E-02 | A | G | 1.09 (0.79 - 1.51) | 5.91 X 10 <sup>-01</sup> | 1.15 (0.89 - 1.49) | 2.88 X 10 <sup>01</sup> |
| rs538499   | 1 | 234379565 | RYR2   | Intron     | 0.96 | 6.55E-01 | A | G | 1.04 (0.74 - 1.46) | 8.36 X 10 <sup>-01</sup> | 1.06 (0.80 - 1.41) | 6.75 X 10 <sup>01</sup> |
| rs12144410 | 1 | 234380845 | RYR2   | Promoter   | 0.98 | 7.94E-01 | A | G | 0.98 (0.64 - 1.49) | 9.20 X 10 <sup>-01</sup> | 1.07 (0.75 - 1.53) | 7.18 X 10 <sup>01</sup> |
| rs693420   | 1 | 234381659 | RYR2   | Promoter   | 0.98 | 1.76E-01 | C | T | 1.00 (0.60 - 1.67) | 9.89 X 10 <sup>-01</sup> | 0.87 (0.57 - 1.32) | 5.06 X 10 <sup>01</sup> |
| rs1490291  | 1 | 234397027 | RYR2   | Intron     | 0.98 | 2.90E-01 | A | G | 0.96 (0.65 - 1.40) | 8.25 X 10 <sup>-01</sup> | 1.08 (0.79 - 1.47) | 6.28 X 10 <sup>01</sup> |
| rs1416799  | 1 | 234402114 | RYR2   | Intron     | 0.97 | 9.71E-03 | A | T | 0.96 (0.70 - 1.32) | 7.96 X 10 <sup>-01</sup> | 0.87 (0.68 - 1.13) | 2.97 X 10 <sup>01</sup> |
| rs547984   | 1 | 234422927 | RYR2   | Intron     | 0.98 | 7.68E-01 | G | T | 1.02 (0.73 - 1.44) | 9.00 X 10 <sup>-01</sup> | 0.89 (0.69 - 1.16) | 3.84 X 10 <sup>01</sup> |
| rs925229   | 2 | 24146091  | FKBP1B | Intron     | 0.98 | 4.63E-01 | A | T | 0.92 (0.67 - 1.28) | 6.41 X 10 <sup>-01</sup> | 1.14 (0.88 - 1.48) | 3.35 X 10 <sup>01</sup> |
| rs6545222  | 2 | 24147355  | FKBP1B | Intron     | 0.98 | 9.47E-01 | C | G | 1.13 (0.77 - 1.65) | 5.40 X 10 <sup>-01</sup> | 1.12 (0.82 - 1.52) | 4.81 X 10 <sup>01</sup> |
| rs2136264  | 2 | 24154778  | FKBP1B | Downstream | 0.98 | 3.82E-01 | A | G | 1.12 (0.80 - 1.57) | 4.96 X 10 <sup>-01</sup> | 1.06 (0.81 - 1.39) | 6.77 X 10 <sup>01</sup> |
| rs7561273  | 2 | 24159165  | FKBP1B | Downstream | 0.98 | 7.69E-01 | A | G | 1.04 (0.75 - 1.45) | 8.04 X 10 <sup>-01</sup> | 0.94 (0.73 - 1.22) | 6.32 X 10 <sup>01</sup> |
| rs11125371 | 2 | 24166499  | FKBP1B | Intron     | 0.98 | 6.57E-01 | A | G | 0.95 (0.68 - 1.33) | 7.66 X 10 <sup>-01</sup> | 0.93 (0.71 - 1.21) | 5.72 X 10 <sup>01</sup> |
| rs7355559  | 2 | 24168597  | FKBP1B | Intron     | 0.99 | 2.38E-03 | G | T | 0.99 (0.59 - 1.68) | 9.78 X 10 <sup>-01</sup> | 0.90 (0.61 - 1.32) | 5.82 X 10 <sup>01</sup> |
| rs4270307  | 2 | 24177849  | FKBP1B | Intron     | 0.98 | 1.08E-01 | C | T | 1.56 (0.96 - 2.55) | 7.14 X 10 <sup>-02</sup> | 1.01 (0.69 - 1.47) | 9.67 X 10 <sup>01</sup> |
| rs10167808 | 2 | 24183631  | FKBP1B | Promoter   | 0.97 | 2.78E-02 | C | G | 0.75 (0.46 - 1.21) | 2.35 X 10 <sup>-01</sup> | 0.96 (0.65 - 1.42) | 8.39 X 10 <sup>01</sup> |
| rs10185680 | 2 | 24186957  | FKBP1B | Intron     | 0.98 | 4.48E-02 | A | G | 1.02 (0.73 - 1.43) | 8.89 X 10 <sup>-01</sup> | 0.92 (0.71 - 1.20) | 5.47 X 10 <sup>01</sup> |
| rs7568163  | 2 | 24190492  | FKBP1B | Intron     | 0.97 | 4.96E-01 | A | G | 1.09 (0.74 - 1.61) | 6.51 X 10 <sup>-01</sup> | 1.00 (0.74 - 1.35) | 9.91 X 10 <sup>01</sup> |
| rs2160943  | 2 | 24200426  | FKBP1B | Downstream | 0.99 | 7.56E-01 | G | T | 0.89 (0.64 - 1.24) | 4.93 X 10 <sup>-01</sup> | 0.89 (0.68 - 1.16) | 3.91 X 10 <sup>01</sup> |
| rs2303287  | 2 | 24213897  | FKBP1B | Intron     | 0.99 | 8.73E-01 | C | T | 0.97 (0.63 - 1.48) | 8.87 X 10 <sup>-01</sup> | 0.87 (0.63 - 1.21) | 4.23 X 10 <sup>01</sup> |
| rs6733127  | 2 | 24237456  | FKBP1B | Intron     | 0.98 | 4.64E-01 | A | G | 1.02 (0.74 - 1.41) | 9.09 X 10 <sup>-01</sup> | 1.17 (0.90 - 1.52) | 2.47 X 10 <sup>01</sup> |
| rs4053823  | 3 | 8720008   | CAV3   | Intron     | 0.97 | 6.86E-01 | A | G | 1.38 (0.99 - 1.92) | 5.91 X 10 <sup>-02</sup> | 1.22 (0.93 - 1.58) | 1.48 X 10 <sup>01</sup> |
| rs164459   | 3 | 8720493   | CAV3   | Intron     | 0.97 | 5.14E-01 | A | G | 0.92 (0.66 - 1.29) | 6.27 X 10 <sup>-01</sup> | 0.92 (0.70 - 1.22) | 5.78 X 10 <sup>01</sup> |
| rs164460   | 3 | 8722818   | CAV3   | Intron     | 0.98 | 9.56E-01 | A | G | 1.11 (0.78 - 1.57) | 5.54 X 10 <sup>-01</sup> | 1.20 (0.91 - 1.58) | 1.92 X 10 <sup>01</sup> |
| rs164463   | 3 | 8723854   | CAV3   | Intron     | 0.97 | 2.61E-01 | C | T | 1.12 (0.80 - 1.57) | 5.01 X 10 <sup>-01</sup> | 1.20 (0.92 - 1.55) | 1.85 X 10 <sup>01</sup> |
| rs164464   | 3 | 8724012   | CAV3   | Intron     | 0.98 | 4.74E-01 | C | T | 1.31 (0.83 - 2.07) | 2.53 X 10 <sup>-01</sup> | 0.93 (0.65 - 1.33) | 6.83 X 10 <sup>01</sup> |
| rs12497498 | 3 | 8726490   | CAV3   | Intron     | 0.98 | 4.55E-01 | A | G | 0.88 (0.58 - 1.34) | 5.54 X 10 <sup>-01</sup> | 0.93 (0.67 - 1.30) | 6.68 X 10 <sup>01</sup> |
| rs12491393 | 3 | 8726897   | CAV3   | Intron     | 0.99 | 4.38E-01 | C | G | 1.14 (0.72 - 1.82) | 5.70 X 10 <sup>-01</sup> | 1.09 (0.77 - 1.55) | 6.32 X 10 <sup>01</sup> |



|            |   |          |          |            |      |           |   |   |                    |                          |                    |                          |
|------------|---|----------|----------|------------|------|-----------|---|---|--------------------|--------------------------|--------------------|--------------------------|
| rs765450   | 3 | 8727296  | CAV3     |            | 0.97 | 7.95E-01  | A | G | 0.65 (0.42 - 1.01) | 5.69 X 10 <sup>-02</sup> | 0.74 (0.50 - 1.09) | 1.26 X 10 <sup>-01</sup> |
| rs6443202  | 3 | 8728218  | CAV3     |            | 0.98 | 2.88E-02  | C | G | 0.95 (0.70 - 1.30) | 7.43 X 10 <sup>-01</sup> | 1.04 (0.81 - 1.34) | 7.45 X 10 <sup>-01</sup> |
| rs6774860  | 3 | 8729639  | CAV3     |            | 0.99 | 1.00E+00  | C | G | 1.17 (0.84 - 1.63) | 3.42 X 10 <sup>-01</sup> | 0.94 (0.72 - 1.23) | 6.63 X 10 <sup>-01</sup> |
| rs6798626  | 3 | 8729648  | CAV3     |            | 0.96 | 3.20E-52  | A | G | 1.10 (0.71 - 1.71) | 6.78 X 10 <sup>-01</sup> | 0.89 (0.61 - 1.28) | 5.23 X 10 <sup>-01</sup> |
| rs6778530  | 3 | 8730765  | CAV3     |            | 0.97 | 1.87E-104 | C | T | 0.97 (0.61 - 1.54) | 8.96 X 10 <sup>-01</sup> | 1.06 (0.73 - 1.53) | 7.69 X 10 <sup>-01</sup> |
| rs11718527 | 3 | 8731772  | CAV3     |            | 0.99 | 2.68E-01  | C | T | 0.85 (0.62 - 1.18) | 3.36 X 10 <sup>-01</sup> | 0.99 (0.75 - 1.29) | 9.24 X 10 <sup>-01</sup> |
| rs17049469 | 3 | 8732311  | CAV3     |            | 0.96 | 3.94E-01  | C | G | 0.97 (0.71 - 1.33) | 8.70 X 10 <sup>-01</sup> | 1.08 (0.83 - 1.40) | 5.82 X 10 <sup>-01</sup> |
| rs1873035  | 3 | 8739300  | CAV3     |            | 0.99 | 2.56E-01  | C | G | 1.32 (0.97 - 1.81) | 8.16 X 10 <sup>-02</sup> | 0.99 (0.77 - 1.29) | 9.62 X 10 <sup>-01</sup> |
| rs1471970  | 3 | 8740024  | CAV3     |            | 0.94 | 4.60E-01  | A | G | 0.98 (0.63 - 1.53) | 9.41 X 10 <sup>-01</sup> | 1.09 (0.77 - 1.54) | 6.44 X 10 <sup>-01</sup> |
| rs17362990 | 3 | 8742642  | CAV3     | Promoter   | 0.98 | 8.63E-01  | A | G | 0.93 (0.61 - 1.42) | 7.41 X 10 <sup>-01</sup> | 0.96 (0.67 - 1.36) | 8.04 X 10 <sup>-01</sup> |
| rs9816472  | 3 | 8746909  | CAV3     | Promoter   | 0.99 | 4.79E-01  | C | T | 1.35 (0.95 - 1.92) | 9.09 X 10 <sup>-02</sup> | 1.06 (0.81 - 1.37) | 6.90 X 10 <sup>-01</sup> |
| rs237860   | 3 | 8748131  | CAV3     | Promoter   | 0.97 | 9.69E-03  | C | T | 0.72 (0.50 - 1.04) | 7.80 X 10 <sup>-02</sup> | 0.95 (0.71 - 1.26) | 7.10 X 10 <sup>-01</sup> |
| rs237862   | 3 | 8748285  | CAV3     | Promoter   | 0.98 | 6.02E-02  | A | G | 0.97 (0.69 - 1.35) | 8.45 X 10 <sup>-01</sup> | 1.08 (0.83 - 1.42) | 5.64 X 10 <sup>-01</sup> |
| rs237864   | 3 | 8748552  | CAV3     | Promoter   | 0.99 | 5.83E-01  | C | T | 1.21 (0.76 - 1.93) | 4.26 X 10 <sup>-01</sup> | 1.16 (0.80 - 1.66) | 4.35 X 10 <sup>-01</sup> |
| rs237865   | 3 | 8748968  | CAV3     | Promoter   | 0.97 | 3.11E-143 | A | C | 1.33 (0.77 - 2.30) | 3.12 X 10 <sup>-01</sup> | 1.51 (0.98 - 2.31) | 6.03 X 10 <sup>-02</sup> |
| rs237866   | 3 | 8749129  | CAV3     | Promoter   | 0.97 | 8.01E-01  | C | T | 0.75 (0.54 - 1.05) | 9.28 X 10 <sup>-02</sup> | 0.75 (0.57 - 0.98) | 3.61 X 10 <sup>-02</sup> |
| rs2268485  | 3 | 8749285  | CAV3     | Promoter   | 0.96 | 5.97E-01  | A | G | 0.76 (0.55 - 1.06) | 1.07 X 10 <sup>-01</sup> | 0.73 (0.55 - 0.95) | 2.13 X 10 <sup>-02</sup> |
| rs2270463  | 3 | 8750077  | CAV3     | Promoter   | 0.98 | 5.74E-01  | G | T | 0.85 (0.57 - 1.27) | 4.29 X 10 <sup>-01</sup> | 0.74 (0.54 - 1.02) | 6.75 X 10 <sup>-02</sup> |
| rs2072583  | 3 | 8750457  | CAV3     | Promoter   | 0.99 | 2.29E-01  | A | G | 0.88 (0.59 - 1.29) | 5.00 X 10 <sup>-01</sup> | 0.73 (0.53 - 0.99) | 4.25 X 10 <sup>-02</sup> |
| rs1008642  | 3 | 8750661  | CAV3     | Exon       | 0.97 | 2.06E-01  | C | T | 0.85 (0.58 - 1.25) | 4.11 X 10 <sup>-01</sup> | 0.76 (0.56 - 1.04) | 8.18 X 10 <sup>-02</sup> |
| rs1558991  | 3 | 8750847  | CAV3     | Intron     | 0.95 | 5.05E-01  | C | G | 1.15 (0.77 - 1.73) | 4.98 X 10 <sup>-01</sup> | 1.03 (0.74 - 1.43) | 8.51 X 10 <sup>-01</sup> |
| rs237872   | 3 | 8755438  | CAV3     | Intron     | 0.99 | 2.45E-01  | C | T | 0.85 (0.61 - 1.17) | 3.16 X 10 <sup>-01</sup> | 0.84 (0.65 - 1.08) | 1.70 X 10 <sup>-01</sup> |
| rs151462   | 3 | 8756607  | CAV3     | Intron     | 0.99 | 7.47E-01  | C | T | 1.08 (0.78 - 1.51) | 6.31 X 10 <sup>-01</sup> | 1.16 (0.88 - 1.53) | 2.87 X 10 <sup>-01</sup> |
| rs237874   | 3 | 8757338  | CAV3     | Intron     | 0.98 | 6.08E-01  | C | G | 1.19 (0.83 - 1.69) | 3.40 X 10 <sup>-01</sup> | 1.12 (0.84 - 1.49) | 4.38 X 10 <sup>-01</sup> |
| rs17297803 | 3 | 8758207  | CAV3     | Intron     | 0.98 | 7.55E-01  | A | G | 1.18 (0.75 - 1.84) | 4.77 X 10 <sup>-01</sup> | 1.18 (0.82 - 1.71) | 3.73 X 10 <sup>-01</sup> |
| rs17049505 | 3 | 8764571  | CAV3     | Downstream | 0.93 | 8.81E-01  | A | T | 1.10 (0.63 - 1.94) | 7.31 X 10 <sup>-01</sup> | 0.94 (0.59 - 1.49) | 7.82 X 10 <sup>-01</sup> |
| rs1042778  | 3 | 8769545  | CAV3     | 3'UTR      | 0.98 | 1.03E-02  | G | T | 1.24 (0.88 - 1.75) | 2.27 X 10 <sup>-01</sup> | 1.27 (0.96 - 1.68) | 8.78 X 10 <sup>-02</sup> |
| rs237885   | 3 | 8770543  | CAV3     | Intron     | 0.99 | 7.08E-02  | G | T | 0.76 (0.55 - 1.06) | 1.04 X 10 <sup>-01</sup> | 0.82 (0.63 - 1.07) | 1.44 X 10 <sup>-01</sup> |
| rs11706648 | 3 | 8771547  | CAV3     | Intron     | 0.98 | 6.97E-01  | A | C | 1.19 (0.84 - 1.68) | 3.32 X 10 <sup>-01</sup> | 1.09 (0.82 - 1.43) | 5.62 X 10 <sup>-01</sup> |
| rs237887   | 3 | 8772042  | CAV3     | Intron     | 0.98 | 6.17E-01  | A | G | 0.72 (0.52 - 0.99) | 4.16 X 10 <sup>-02</sup> | 0.80 (0.62 - 1.04) | 1.02 X 10 <sup>-01</sup> |
| rs9840864  | 3 | 8773477  | CAV3     | Intron     | 0.99 | 1.00E+00  | C | G | 0.78 (0.54 - 1.13) | 1.95 X 10 <sup>-01</sup> | 0.99 (0.73 - 1.34) | 9.60 X 10 <sup>-01</sup> |
| rs4686301  | 3 | 8773586  | CAV3     | Intron     | 0.98 | 3.46E-11  | C | T | 1.22 (0.82 - 1.82) | 3.28 X 10 <sup>-01</sup> | 1.07 (0.78 - 1.46) | 6.70 X 10 <sup>-01</sup> |
| rs2268492  | 3 | 8775672  | CAV3     | Intron     | 0.98 | 2.10E-01  | C | T | 1.06 (0.75 - 1.51) | 7.44 X 10 <sup>-01</sup> | 0.95 (0.72 - 1.27) | 7.48 X 10 <sup>-01</sup> |
| rs237889   | 3 | 8777483  | CAV3     | Intron     | 0.97 | 4.61E-01  | C | T | 0.98 (0.71 - 1.36) | 9.17 X 10 <sup>-01</sup> | 0.86 (0.66 - 1.13) | 2.84 X 10 <sup>-01</sup> |
| rs11131149 | 3 | 8777851  | CAV3     | Intron     | 0.98 | 8.80E-01  | A | G | 1.10 (0.80 - 1.52) | 5.62 X 10 <sup>-01</sup> | 1.16 (0.89 - 1.51) | 2.75 X 10 <sup>-01</sup> |
| rs180789   | 3 | 8788927  | CAV3     | Promoter   | 0.98 | 1.86E-01  | A | G | 1.01 (0.70 - 1.47) | 9.53 X 10 <sup>-01</sup> | 0.86 (0.64 - 1.15) | 3.11 X 10 <sup>-01</sup> |
| rs237922   | 3 | 8791344  | CAV3     | Promoter   | 0.95 | 4.11E-01  | A | T | 1.04 (0.74 - 1.45) | 8.43 X 10 <sup>-01</sup> | 0.99 (0.75 - 1.31) | 9.70 X 10 <sup>-01</sup> |
| rs6443206  | 3 | 8795075  | CAV3     | Promoter   | 0.93 | 4.57E-01  | A | G | 1.07 (0.73 - 1.58) | 7.23 X 10 <sup>-01</sup> | 1.29 (0.94 - 1.77) | 1.18 X 10 <sup>-01</sup> |
| rs757575   | 3 | 8795732  | CAV3     | Promoter   | 0.99 | 4.13E-01  | G | T | 1.30 (0.83 - 2.01) | 2.51 X 10 <sup>-01</sup> | 1.05 (0.74 - 1.50) | 7.86 X 10 <sup>-01</sup> |
| rs6790151  | 3 | 8800751  | CAV3     |            | 0.97 | 1.09E-09  | A | G | 0.92 (0.58 - 1.46) | 7.21 X 10 <sup>-01</sup> | 1.23 (0.82 - 1.85) | 3.14 X 10 <sup>-01</sup> |
| rs2287580  | 3 | 8808387  | CAV3     |            | 0.98 | 5.68E-01  | A | G | 1.06 (0.72 - 1.57) | 7.72 X 10 <sup>-01</sup> | 1.30 (0.94 - 1.81) | 1.13 X 10 <sup>-01</sup> |
| rs237851   | 3 | 8809723  | CAV3     |            | 0.98 | 4.35E-01  | A | G | 1.25 (0.91 - 1.72) | 1.62 X 10 <sup>-01</sup> | 1.26 (0.98 - 1.63) | 6.94 X 10 <sup>-02</sup> |
| rs237849   | 3 | 8811470  | CAV3     |            | 0.98 | 7.07E-01  | A | T | 1.39 (0.96 - 2.01) | 8.03 X 10 <sup>-02</sup> | 1.11 (0.83 - 1.49) | 4.85 X 10 <sup>-01</sup> |
| rs345072   | 3 | 8817809  | CAV3     |            | 0.96 | 5.70E-03  | C | G | 1.26 (0.85 - 1.88) | 2.51 X 10 <sup>-01</sup> | 1.23 (0.88 - 1.71) | 2.19 X 10 <sup>-01</sup> |
| rs1714299  | 3 | 8823916  | CAV3     |            | 0.99 | 5.24E-01  | C | T | 0.95 (0.68 - 1.33) | 7.55 X 10 <sup>-01</sup> | 0.83 (0.64 - 1.07) | 1.49 X 10 <sup>-01</sup> |
| rs1643027  | 3 | 8825723  | CAV3     |            | 0.98 | 1.00E+00  | A | G | 1.20 (0.81 - 1.78) | 3.67 X 10 <sup>-01</sup> | 1.16 (0.83 - 1.60) | 3.82 X 10 <sup>-01</sup> |
| rs1714303  | 3 | 8828177  | CAV3     |            | 0.99 | 6.40E-01  | G | T | 1.18 (0.80 - 1.74) | 4.07 X 10 <sup>-01</sup> | 1.01 (0.73 - 1.40) | 9.43 X 10 <sup>-01</sup> |
| rs2544163  | 3 | 8829367  | CAV3     |            | 0.98 | 6.76E-01  | C | T | 0.85 (0.56 - 1.29) | 4.39 X 10 <sup>-01</sup> | 0.88 (0.62 - 1.24) | 4.53 X 10 <sup>-01</sup> |
| rs759772   | 3 | 8829427  | CAV3     |            | 0.99 | 6.96E-01  | C | G | 1.18 (0.86 - 1.62) | 3.17 X 10 <sup>-01</sup> | 1.24 (0.96 - 1.60) | 1.04 X 10 <sup>-01</sup> |
| rs345068   | 3 | 8831315  | CAV3     |            | 0.97 | 2.83E-02  | A | C | 0.81 (0.59 - 1.11) | 1.88 X 10 <sup>-01</sup> | 0.86 (0.67 - 1.10) | 2.27 X 10 <sup>-01</sup> |
| rs2270470  | 3 | 8832045  | CAV3     |            | 0.99 | 6.59E-06  | C | T | 1.31 (0.80 - 2.15) | 2.88 X 10 <sup>-01</sup> | 1.30 (0.86 - 1.99) | 2.17 X 10 <sup>-01</sup> |
| rs345066   | 3 | 8835241  | CAV3     |            | 0.98 | 1.07E-01  | A | G | 1.04 (0.75 - 1.43) | 8.20 X 10 <sup>-01</sup> | 1.02 (0.79 - 1.33) | 8.62 X 10 <sup>-01</sup> |
| rs9822653  | 3 | 31988947 | GPD1L    | Intron     | 0.98 | 1.06E-01  | C | G | 1.06 (0.74 - 1.53) | 7.45 X 10 <sup>-01</sup> | 1.24 (0.93 - 1.66) | 1.40 X 10 <sup>-01</sup> |
| rs11716431 | 3 | 31989108 | GPD1L    | Intron     | 0.98 | 6.08E-01  | C | T | 1.21 (0.78 - 1.86) | 3.93 X 10 <sup>-01</sup> | 1.21 (0.86 - 1.68) | 2.71 X 10 <sup>-01</sup> |
| rs4383559  | 3 | 31994689 | GPD1L    | Intron     | 0.98 | 8.95E-01  | C | T | 0.96 (0.66 - 1.41) | 8.40 X 10 <sup>-01</sup> | 1.04 (0.77 - 1.40) | 7.99 X 10 <sup>-01</sup> |
| rs11129475 | 3 | 32005548 | GPD1L    | Promoter   | 0.98 | 6.10E-02  | C | T | 1.09 (0.74 - 1.61) | 6.59 X 10 <sup>-01</sup> | 1.40 (1.00 - 1.96) | 5.05 X 10 <sup>-02</sup> |
| rs13327469 | 3 | 32023183 | GPD1L    |            | 0.98 | 5.98E-01  | C | T | 1.07 (0.68 - 1.68) | 7.83 X 10 <sup>-01</sup> | 0.86 (0.61 - 1.23) | 4.18 X 10 <sup>-01</sup> |
| rs13314142 | 3 | 32023280 | GPD1L    |            | 0.98 | 2.52E-01  | C | T | 1.11 (0.76 - 1.62) | 5.99 X 10 <sup>-01</sup> | 0.99 (0.73 - 1.34) | 9.60 X 10 <sup>-01</sup> |
| rs10510653 | 3 | 32033563 | GPD1L    |            | 0.99 | 4.85E-03  | A | T | 0.88 (0.54 - 1.42) | 5.91 X 10 <sup>-01</sup> | 1.23 (0.80 - 1.90) | 3.46 X 10 <sup>-01</sup> |
| rs13070370 | 3 | 32034172 | GPD1L    |            | 0.98 | 2.37E-01  | C | T | 1.08 (0.79 - 1.49) | 6.20 X 10 <sup>-01</sup> | 1.20 (0.92 - 1.56) | 1.72 X 10 <sup>-01</sup> |
| rs12496020 | 3 | 32043955 | GPD1L    |            | 0.98 | 5.34E-01  | C | T | 1.24 (0.85 - 1.79) | 2.64 X 10 <sup>-01</sup> | 1.20 (0.88 - 1.64) | 2.39 X 10 <sup>-01</sup> |
| rs7612935  | 3 | 32049199 | GPD1L    |            | 0.98 | 3.55E-01  | C | G | 1.15 (0.84 - 1.58) | 3.78 X 10 <sup>-01</sup> | 1.29 (1.00 - 1.67) | 5.36 X 10 <sup>-02</sup> |
| rs901089   | 3 | 32057793 | GPD1L_GC |            | 0.98 | 1.00E+00  | C | T | 1.18 (0.80 - 1.74) | 4.12 X 10 <sup>-01</sup> | 1.13 (0.82 - 1.54) | 4.57 X 10 <sup>-01</sup> |
| rs4955135  | 3 | 32094903 | GPD1L    |            | 0.98 | 7.09E-01  | A | T | 1.17 (0.79 - 1.73) | 4.34 X 10 <sup>-01</sup> | 1.05 (0.75 - 1.45) | 7.88 X 10 <sup>-01</sup> |

|            |   |          |       |            |      |          |   |   |                    |                          |                    |                          |
|------------|---|----------|-------|------------|------|----------|---|---|--------------------|--------------------------|--------------------|--------------------------|
| rs9862154  | 3 | 32096706 | GPD1L |            | 0.98 | 1.00E+00 | C | G | 1.15 (0.77 - 1.71) | 5.04 X 10 <sup>-01</sup> | 1.00 (0.73 - 1.37) | 9.82 X 10 <sup>-01</sup> |
| rs17028838 | 3 | 32097735 | GPD1L |            | 0.99 | 1.34E-02 | C | T | 0.76 (0.45 - 1.26) | 2.85 X 10 <sup>-01</sup> | 0.87 (0.58 - 1.31) | 5.07 X 10 <sup>-01</sup> |
| rs7643045  | 3 | 32100014 | GPD1L |            | 0.99 | 2.44E-01 | A | G | 1.25 (0.89 - 1.77) | 2.00 X 10 <sup>-01</sup> | 1.47 (1.09 - 1.97) | 1.05 X 10 <sup>-02</sup> |
| rs17028843 | 3 | 32100406 | GPD1L |            | 0.99 | 3.52E-01 | A | G | 0.91 (0.52 - 1.59) | 7.38 X 10 <sup>-01</sup> | 0.74 (0.47 - 1.16) | 1.89 X 10 <sup>-01</sup> |
| rs4955240  | 3 | 32107687 | GPD1L |            | 0.98 | 1.10E-01 | C | G | 1.18 (0.87 - 1.60) | 2.80 X 10 <sup>-01</sup> | 1.12 (0.87 - 1.45) | 3.72 X 10 <sup>-01</sup> |
| rs12489053 | 3 | 32108308 | GPD1L |            | 0.98 | 1.53E-01 | A | G | 1.12 (0.81 - 1.54) | 5.08 X 10 <sup>-01</sup> | 1.17 (0.89 - 1.54) | 2.53 X 10 <sup>-01</sup> |
| rs6807207  | 3 | 32114680 | GPD1L | Promoter   | 0.98 | 5.83E-01 | A | T | 1.08 (0.73 - 1.61) | 6.96 X 10 <sup>-01</sup> | 1.17 (0.84 - 1.62) | 3.57 X 10 <sup>-01</sup> |
| rs6790564  | 3 | 32116895 | GPD1L | Promoter   | 0.98 | 8.78E-01 | A | G | 1.04 (0.70 - 1.54) | 8.42 X 10 <sup>-01</sup> | 1.12 (0.82 - 1.54) | 4.79 X 10 <sup>-01</sup> |
| rs1159444  | 3 | 32121192 | GPD1L | Promoter   | 0.99 | 1.44E-01 | A | C | 1.07 (0.66 - 1.75) | 7.74 X 10 <sup>-01</sup> | 0.98 (0.66 - 1.45) | 9.09 X 10 <sup>-01</sup> |
| rs13061752 | 3 | 32129328 | GPD1L | Intron     | 0.99 | 8.03E-01 | A | G | 1.01 (0.68 - 1.51) | 9.52 X 10 <sup>-01</sup> | 1.12 (0.81 - 1.56) | 4.86 X 10 <sup>-01</sup> |
| rs12634660 | 3 | 32129512 | GPD1L | Intron     | 0.98 | 1.28E-01 | C | T | 1.03 (0.74 - 1.43) | 8.66 X 10 <sup>-01</sup> | 1.16 (0.89 - 1.53) | 2.75 X 10 <sup>-01</sup> |
| rs6762236  | 3 | 32134166 | GPD1L | Intron     | 0.98 | 2.83E-03 | C | T | 1.16 (0.85 - 1.60) | 3.46 X 10 <sup>-01</sup> | 1.18 (0.91 - 1.51) | 2.06 X 10 <sup>-01</sup> |
| rs2167385  | 3 | 32152272 | GPD1L | Intron     | 0.99 | 3.27E-01 | A | T | 1.20 (0.79 - 1.84) | 3.87 X 10 <sup>-01</sup> | 1.35 (0.95 - 1.92) | 9.38 X 10 <sup>-02</sup> |
| rs12637969 | 3 | 32156407 | GPD1L | Intron     | 0.99 | 5.23E-01 | A | G | 1.32 (0.91 - 1.91) | 1.44 X 10 <sup>-01</sup> | 1.29 (0.95 - 1.75) | 1.02 X 10 <sup>-01</sup> |
| rs9835387  | 3 | 32156765 | GPD1L | Exon       | 0.99 | 2.97E-01 | C | T | 0.97 (0.60 - 1.56) | 8.99 X 10 <sup>-01</sup> | 0.86 (0.59 - 1.24) | 4.17 X 10 <sup>-01</sup> |
| rs11129496 | 3 | 32161901 | GPD1L | Intron     | 0.98 | 9.65E-02 | A | G | 1.12 (0.80 - 1.55) | 5.13 X 10 <sup>-01</sup> | 1.05 (0.81 - 1.37) | 7.12 X 10 <sup>-01</sup> |
| rs10049223 | 3 | 32164252 | GPD1L | Intron     | 0.97 | 3.52E-03 | C | T | 1.12 (0.81 - 1.54) | 4.86 X 10 <sup>-01</sup> | 1.12 (0.86 - 1.46) | 3.97 X 10 <sup>-01</sup> |
| rs9853070  | 3 | 32177761 | GPD1L | Intron     | 0.99 | 9.93E-02 | C | T | 1.33 (0.97 - 1.83) | 7.48 X 10 <sup>-02</sup> | 1.25 (0.96 - 1.61) | 9.73 X 10 <sup>-02</sup> |
| rs2813     | 3 | 32183625 | GPD1L | 3'UTR      | 0.97 | 7.78E-01 | A | T | 1.42 (1.01 - 2.01) | 4.43 X 10 <sup>-02</sup> | 1.39 (1.05 - 1.85) | 2.17 X 10 <sup>-02</sup> |
| rs7641382  | 3 | 32190375 | GPD1L | Downstream | 0.92 | 2.04E-05 | C | T | 1.73 (1.01 - 2.95) | 4.52 X 10 <sup>-02</sup> | 1.65 (1.11 - 2.45) | 1.25 X 10 <sup>-02</sup> |
| rs7620066  | 3 | 32194428 | GPD1L | Downstream | 0.98 | 6.16E-01 | A | T | 1.32 (0.93 - 1.87) | 1.23 X 10 <sup>-01</sup> | 1.31 (0.99 - 1.72) | 5.75 X 10 <sup>-02</sup> |
| rs9842565  | 3 | 32198485 | GPD1L |            | 0.98 | 4.96E-01 | A | G | 1.26 (0.84 - 1.91) | 2.65 X 10 <sup>-01</sup> | 1.17 (0.84 - 1.63) | 3.58 X 10 <sup>-01</sup> |
| rs11927705 | 3 | 32204438 | GPD1L |            | 0.98 | 2.15E-01 | C | T | 1.10 (0.64 - 1.86) | 7.36 X 10 <sup>-01</sup> | 1.35 (0.90 - 2.03) | 1.49 X 10 <sup>-01</sup> |
| rs11711134 | 3 | 32209551 | GPD1L |            | 0.98 | 3.53E-01 | A | G | 1.10 (0.77 - 1.57) | 6.13 X 10 <sup>-01</sup> | 0.84 (0.64 - 1.10) | 2.09 X 10 <sup>-01</sup> |
| rs11720070 | 3 | 32210485 | GPD1L |            | 0.99 | 4.11E-01 | C | T | 1.06 (0.76 - 1.47) | 7.44 X 10 <sup>-01</sup> | 0.99 (0.76 - 1.30) | 9.62 X 10 <sup>-01</sup> |
| rs4440157  | 3 | 32211062 | GPD1L |            | 0.98 | 7.07E-01 | A | G | 0.55 (0.32 - 0.96) | 3.42 X 10 <sup>-02</sup> | 0.79 (0.49 - 1.28) | 3.39 X 10 <sup>-01</sup> |
| rs5025419  | 3 | 32214253 | GPD1L |            | 0.97 | 7.64E-01 | C | T | 0.94 (0.67 - 1.32) | 7.21 X 10 <sup>-01</sup> | 0.89 (0.68 - 1.16) | 3.95 X 10 <sup>-01</sup> |
| rs4245875  | 3 | 32214663 | GPD1L |            | 0.98 | 4.51E-01 | G | T | 0.91 (0.61 - 1.36) | 6.50 X 10 <sup>-01</sup> | 0.81 (0.59 - 1.12) | 2.02 X 10 <sup>-01</sup> |
| rs6804760  | 3 | 32217312 | GPD1L |            | 0.98 | 3.04E-01 | C | T | 1.12 (0.67 - 1.86) | 6.63 X 10 <sup>-01</sup> | 1.36 (0.91 - 2.02) | 1.36 X 10 <sup>-01</sup> |
| rs4078487  | 3 | 32220259 | GPD1L |            | 0.99 | 1.00E+00 | G | T | 0.80 (0.49 - 1.30) | 3.72 X 10 <sup>-01</sup> | 0.98 (0.64 - 1.50) | 9.17 X 10 <sup>-01</sup> |
| rs4955137  | 3 | 32223604 | GPD1L |            | 0.98 | 2.45E-01 | A | G | 1.08 (0.77 - 1.50) | 6.74 X 10 <sup>-01</sup> | 1.14 (0.88 - 1.48) | 3.23 X 10 <sup>-01</sup> |
| rs4955138  | 3 | 32223966 | GPD1L |            | 0.98 | 2.95E-01 | A | G | 1.07 (0.73 - 1.58) | 7.35 X 10 <sup>-01</sup> | 1.16 (0.85 - 1.58) | 3.60 X 10 <sup>-01</sup> |
| rs9310986  | 3 | 32225923 | GPD1L |            | 0.98 | 3.83E-01 | A | G | 1.28 (0.92 - 1.79) | 1.44 X 10 <sup>-01</sup> | 1.08 (0.83 - 1.39) | 5.70 X 10 <sup>-01</sup> |
| rs13092164 | 3 | 38433537 | SCN5A | Downstream | 0.98 | 2.48E-01 | A | G | 1.06 (0.76 - 1.47) | 7.25 X 10 <sup>-01</sup> | 1.29 (1.00 - 1.68) | 5.30 X 10 <sup>-02</sup> |
| rs503327   | 3 | 38499367 | SCN5A | Intron     | 0.99 | 2.92E-01 | A | G | 1.40 (0.86 - 2.29) | 1.75 X 10 <sup>-01</sup> | 1.24 (0.83 - 1.84) | 2.95 X 10 <sup>-01</sup> |
| rs6599206  | 3 | 38520353 | SCN5A | Intron     | 0.97 | 2.36E-01 | C | T | 1.02 (0.75 - 1.40) | 8.87 X 10 <sup>-01</sup> | 1.30 (1.00 - 1.68) | 4.69 X 10 <sup>-02</sup> |
| rs17037798 | 3 | 38530478 | SCN5A | Intron     | 0.99 | 5.42E-01 | A | G | 1.28 (0.88 - 1.86) | 1.89 X 10 <sup>-01</sup> | 1.26 (0.94 - 1.69) | 1.18 X 10 <sup>-01</sup> |
| rs9860525  | 3 | 38547009 | SCN5A | Downstream | 0.99 | 4.05E-01 | A | T | 0.84 (0.53 - 1.32) | 4.38 X 10 <sup>-01</sup> | 1.08 (0.74 - 1.58) | 7.06 X 10 <sup>-01</sup> |
| rs6810361  | 3 | 38549972 | SCN5A | Downstream | 0.99 | 8.02E-02 | C | T | 0.73 (0.51 - 1.07) | 1.08 X 10 <sup>-01</sup> | 1.14 (0.83 - 1.56) | 4.26 X 10 <sup>-01</sup> |
| rs3796387  | 3 | 38554211 | SCN5A |            | 0.99 | 2.46E-01 | A | G | 0.71 (0.45 - 1.11) | 1.33 X 10 <sup>-01</sup> | 0.76 (0.52 - 1.10) | 1.42 X 10 <sup>-01</sup> |
| rs6793245  | 3 | 38574041 | SCN5A | Intron     | 0.97 | 1.45E-01 | A | G | 0.97 (0.69 - 1.36) | 8.45 X 10 <sup>-01</sup> | 0.92 (0.70 - 1.22) | 5.69 X 10 <sup>-01</sup> |
| rs13059004 | 3 | 38576241 | SCN5A | Intron     | 0.98 | 8.41E-03 | A | C | 0.97 (0.71 - 1.33) | 8.56 X 10 <sup>-01</sup> | 0.87 (0.67 - 1.12) | 2.75 X 10 <sup>-01</sup> |
| rs3935472  | 3 | 38577859 | SCN5A | Intron     | 0.99 | 4.39E-01 | A | G | 1.37 (0.85 - 2.19) | 1.97 X 10 <sup>-01</sup> | 1.05 (0.73 - 1.50) | 8.06 X 10 <sup>-01</sup> |
| rs7374138  | 3 | 38580736 | SCN5A | Intron     | 0.98 | 1.80E-01 | C | G | 1.12 (0.77 - 1.62) | 5.52 X 10 <sup>-01</sup> | 1.06 (0.79 - 1.42) | 7.12 X 10 <sup>-01</sup> |
| rs7427447  | 3 | 38581592 | SCN5A | Intron     | 0.97 | 9.20E-01 | C | T | 1.29 (0.91 - 1.83) | 1.49 X 10 <sup>-01</sup> | 1.15 (0.88 - 1.50) | 3.07 X 10 <sup>-01</sup> |
| rs9812912  | 3 | 38582233 | SCN5A | Intron     | 0.98 | 5.37E-01 | C | T | 1.13 (0.74 - 1.74) | 5.67 X 10 <sup>-01</sup> | 1.13 (0.80 - 1.59) | 4.97 X 10 <sup>-01</sup> |
| rs7374605  | 3 | 38582307 | SCN5A | Intron     | 0.98 | 1.58E-01 | C | G | 1.19 (0.86 - 1.65) | 3.03 X 10 <sup>-01</sup> | 1.03 (0.79 - 1.33) | 8.52 X 10 <sup>-01</sup> |
| rs9861242  | 3 | 38584338 | SCN5A | Intron     | 0.99 | 3.69E-01 | A | G | 1.03 (0.70 - 1.51) | 8.85 X 10 <sup>-01</sup> | 0.93 (0.68 - 1.26) | 6.21 X 10 <sup>-01</sup> |
| rs9833086  | 3 | 38585475 | SCN5A | Intron     | 0.94 | 8.78E-02 | A | G | 1.02 (0.70 - 1.46) | 9.38 X 10 <sup>-01</sup> | 0.89 (0.66 - 1.19) | 4.28 X 10 <sup>-01</sup> |
| rs7373819  | 3 | 38594316 | SCN5A | Intron     | 0.98 | 2.46E-02 | A | G | 0.82 (0.60 - 1.14) | 2.43 X 10 <sup>-01</sup> | 0.84 (0.65 - 1.09) | 1.94 X 10 <sup>-01</sup> |
| rs7428882  | 3 | 38594352 | SCN5A | Intron     | 0.98 | 1.00E+00 | C | G | 1.23 (0.87 - 1.76) | 2.42 X 10 <sup>-01</sup> | 1.28 (0.97 - 1.68) | 7.64 X 10 <sup>-02</sup> |
| IVS16_6C_T | 3 | 38597872 | SCN5A |            | 0.99 | 1.00E+00 | T | C | 1.28 (0.57 - 2.88) | 5.47 X 10 <sup>-01</sup> | 1.42 (0.76 - 2.64) | 2.72 X 10 <sup>-01</sup> |
| rs3922844  | 3 | 38599257 | SCN5A | Intron     | 0.97 | 2.72E-01 | A | G | 1.23 (0.87 - 1.74) | 2.38 X 10 <sup>-01</sup> | 1.30 (0.99 - 1.70) | 6.21 X 10 <sup>-02</sup> |
| rs6599218  | 3 | 38605278 | SCN5A | Intron     | 0.99 | 4.14E-02 | C | T | 1.11 (0.69 - 1.79) | 6.66 X 10 <sup>-01</sup> | 1.34 (0.91 - 1.98) | 1.39 X 10 <sup>-01</sup> |
| rs7374040  | 3 | 38607051 | SCN5A | Intron     | 0.98 | 1.72E-03 | C | G | 1.05 (0.70 - 1.58) | 8.12 X 10 <sup>-01</sup> | 1.25 (0.90 - 1.74) | 1.77 X 10 <sup>-01</sup> |
| rs10154914 | 3 | 38607634 | SCN5A | Intron     | 0.98 | 8.60E-02 | A | T | 1.33 (0.87 - 2.03) | 1.86 X 10 <sup>-01</sup> | 1.17 (0.86 - 1.60) | 3.25 X 10 <sup>-01</sup> |
| rs7374289  | 3 | 38608075 | SCN5A | Intron     | 0.99 | 6.15E-01 | C | T | 0.86 (0.62 - 1.19) | 3.55 X 10 <sup>-01</sup> | 0.84 (0.65 - 1.09) | 1.99 X 10 <sup>-01</sup> |
| rs11708996 | 3 | 38608927 | SCN5A | Intron     | 0.99 | 2.32E-01 | C | G | 0.92 (0.58 - 1.46) | 7.26 X 10 <sup>-01</sup> | 0.72 (0.49 - 1.05) | 8.95 X 10 <sup>-02</sup> |
| rs7373862  | 3 | 38609347 | SCN5A | Intron     | 0.98 | 5.13E-01 | A | G | 1.01 (0.72 - 1.42) | 9.51 X 10 <sup>-01</sup> | 0.95 (0.72 - 1.26) | 7.37 X 10 <sup>-01</sup> |
| rs9871385  | 3 | 38616138 | SCN5A | Intron     | 0.99 | 7.61E-01 | A | C | 1.19 (0.86 - 1.66) | 2.95 X 10 <sup>-01</sup> | 1.01 (0.78 - 1.30) | 9.62 X 10 <sup>-01</sup> |
| rs7427874  | 3 | 38618283 | SCN5A | Intron     | 0.98 | 5.19E-01 | A | G | 1.19 (0.86 - 1.63) | 2.94 X 10 <sup>-01</sup> | 1.04 (0.80 - 1.34) | 7.85 X 10 <sup>-01</sup> |
| rs1805124  | 3 | 38620424 | SCN5A | Exon       | 0.98 | 4.34E-01 | A | G | 1.33 (0.92 - 1.93) | 1.35 X 10 <sup>-01</sup> | 1.37 (1.03 - 1.82) | 3.31 X 10 <sup>-02</sup> |
| IVS9_3C_A  | 3 | 38622646 | SCN5A |            | 0.98 | 2.79E-01 | A | C | 1.47 (0.96 - 2.26) | 7.88 X 10 <sup>-02</sup> | 1.22 (0.89 - 1.67) | 2.08 X 10 <sup>-01</sup> |
| rs6770569  | 3 | 38622784 | SCN5A | Intron     | 0.99 | 9.61E-01 | C | G | 0.83 (0.59 - 1.15) | 2.56 X 10 <sup>-01</sup> | 0.95 (0.74 - 1.23) | 7.11 X 10 <sup>-01</sup> |

|            |   |           |       |            |      |          |   |   |                    |                          |                    |                          |
|------------|---|-----------|-------|------------|------|----------|---|---|--------------------|--------------------------|--------------------|--------------------------|
| rs6599222  | 3 | 38623066  | SCN5A | Intron     | 0.9  | 1.02E-03 | C | T | 0.91 (0.59 - 1.38) | 6.48 X 10 <sup>-01</sup> | 0.66 (0.47 - 0.93) | 1.63 X 10 <sup>-02</sup> |
| rs9853984  | 3 | 38625184  | SCN5A | Intron     | 0.97 | 4.13E-01 | A | G | 0.74 (0.53 - 1.03) | 7.39 X 10 <sup>-02</sup> | 0.83 (0.64 - 1.08) | 1.65 X 10 <sup>-01</sup> |
| rs6797133  | 3 | 38631037  | SCN5A | Intron     | 0.99 | 1.57E-01 | A | G | 1.23 (0.88 - 1.71) | 2.21 X 10 <sup>-01</sup> | 1.22 (0.94 - 1.58) | 1.35 X 10 <sup>-01</sup> |
| rs11710077 | 3 | 38632903  | SCN5A | Intron     | 0.99 | 1.00E+00 | A | T | 1.38 (0.93 - 2.05) | 1.13 X 10 <sup>-01</sup> | 1.03 (0.76 - 1.39) | 8.73 X 10 <sup>-01</sup> |
| rs12498069 | 3 | 38635940  | SCN5A | Intron     | 0.98 | 1.00E+00 | A | C | 1.14 (0.68 - 1.91) | 6.11 X 10 <sup>-01</sup> | 1.00 (0.67 - 1.51) | 9.93 X 10 <sup>-01</sup> |
| rs6599228  | 3 | 38637965  | SCN5A | Intron     | 0.98 | 8.84E-01 | C | T | 1.01 (0.73 - 1.41) | 9.34 X 10 <sup>-01</sup> | 0.94 (0.73 - 1.23) | 6.59 X 10 <sup>-01</sup> |
| rs3934936  | 3 | 38639313  | SCN5A | Intron     | 0.97 | 6.14E-01 | C | T | 0.86 (0.61 - 1.23) | 4.07 X 10 <sup>-01</sup> | 1.01 (0.76 - 1.35) | 9.37 X 10 <sup>-01</sup> |
| rs7633974  | 3 | 38640927  | SCN5A | Intron     | 0.98 | 1.86E-01 | C | G | 1.33 (0.95 - 1.87) | 9.55 X 10 <sup>-02</sup> | 1.14 (0.87 - 1.49) | 3.53 X 10 <sup>-01</sup> |
| rs6599229  | 3 | 38647589  | SCN5A | Intron     | 0.98 | 6.58E-01 | A | G | 1.10 (0.79 - 1.53) | 5.87 X 10 <sup>-01</sup> | 0.99 (0.76 - 1.30) | 9.66 X 10 <sup>-01</sup> |
| rs11720524 | 3 | 38650416  | SCN5A | Intron     | 0.99 | 9.59E-01 | C | G | 1.18 (0.84 - 1.64) | 3.37 X 10 <sup>-01</sup> | 0.88 (0.67 - 1.15) | 3.44 X 10 <sup>-01</sup> |
| rs6768135  | 3 | 38653013  | SCN5A | Intron     | 0.98 | 8.98E-01 | A | G | 0.83 (0.57 - 1.20) | 3.25 X 10 <sup>-01</sup> | 0.82 (0.61 - 1.10) | 1.82 X 10 <sup>-01</sup> |
| rs7427106  | 3 | 38653505  | SCN5A | Intron     | 0.98 | 5.54E-02 | C | G | 1.98 (1.21 - 3.22) | 6.22 X 10 <sup>-03</sup> | 1.13 (0.79 - 1.61) | 4.95 X 10 <sup>-01</sup> |
| rs9311195  | 3 | 38656222  | SCN5A | Intron     | 0.98 | 2.53E-01 | C | G | 1.51 (1.00 - 2.29) | 4.87 X 10 <sup>-02</sup> | 1.23 (0.89 - 1.70) | 2.14 X 10 <sup>-01</sup> |
| rs6788664  | 3 | 38659470  | SCN5A | Intron     | 0.96 | 8.06E-01 | A | C | 0.87 (0.63 - 1.19) | 3.86 X 10 <sup>-01</sup> | 0.92 (0.71 - 1.19) | 5.36 X 10 <sup>-01</sup> |
| rs7372712  | 3 | 38661196  | SCN5A | Intron     | 0.99 | 9.37E-01 | C | T | 0.98 (0.65 - 1.49) | 9.39 X 10 <sup>-01</sup> | 0.98 (0.71 - 1.37) | 9.12 X 10 <sup>-01</sup> |
| rs7373934  | 3 | 38670712  | SCN5A | Promoter   | 0.99 | 1.91E-01 | A | G | 0.78 (0.54 - 1.13) | 1.93 X 10 <sup>-01</sup> | 0.98 (0.72 - 1.35) | 9.21 X 10 <sup>-01</sup> |
| rs6799802  | 3 | 38671596  | SCN5A | Promoter   | 0.98 | 8.62E-01 | C | T | 0.63 (0.41 - 0.99) | 4.41 X 10 <sup>-02</sup> | 1.01 (0.69 - 1.49) | 9.53 X 10 <sup>-01</sup> |
| rs6788899  | 3 | 38673256  | SCN5A | Promoter   | 0.99 | 1.00E+00 | G | T | 0.63 (0.40 - 0.98) | 3.95 X 10 <sup>-02</sup> | 0.98 (0.66 - 1.43) | 9.00 X 10 <sup>-01</sup> |
| rs6773329  | 3 | 38689480  | SCN5A | Intron     | 0.98 | 8.13E-01 | A | G | 0.60 (0.39 - 0.92) | 1.78 X 10 <sup>-02</sup> | 0.89 (0.63 - 1.28) | 5.39 X 10 <sup>-01</sup> |
| rs7638910  | 3 | 38695720  | SCN5A | Intron     | 0.98 | 2.63E-01 | A | C | 0.76 (0.55 - 1.04) | 8.79 X 10 <sup>-02</sup> | 0.99 (0.76 - 1.28) | 9.22 X 10 <sup>-01</sup> |
| rs7372943  | 3 | 38696164  | SCN5A | Intron     | 0.99 | 4.09E-01 | A | T | 1.08 (0.67 - 1.75) | 7.47 X 10 <sup>-01</sup> | 1.09 (0.73 - 1.62) | 6.85 X 10 <sup>-01</sup> |
| rs7373154  | 3 | 38696312  | SCN5A | Intron     | 0.98 | 9.03E-01 | C | T | 0.76 (0.53 - 1.08) | 1.27 X 10 <sup>-01</sup> | 1.03 (0.77 - 1.39) | 8.25 X 10 <sup>-01</sup> |
| rs7633988  | 3 | 38698221  | SCN5A | Intron     | 0.99 | 7.38E-01 | A | T | 1.02 (0.72 - 1.43) | 9.19 X 10 <sup>-01</sup> | 0.98 (0.75 - 1.29) | 8.91 X 10 <sup>-01</sup> |
| rs7374165  | 3 | 38701689  | SCN5A | Intron     | 0.99 | 7.84E-01 | A | C | 0.89 (0.63 - 1.25) | 4.97 X 10 <sup>-01</sup> | 0.94 (0.71 - 1.25) | 6.93 X 10 <sup>-01</sup> |
| rs6764249  | 3 | 38705121  | SCN5A | Downstream | 0.98 | 3.77E-01 | C | T | 1.04 (0.68 - 1.60) | 8.48 X 10 <sup>-01</sup> | 1.16 (0.82 - 1.65) | 3.95 X 10 <sup>-01</sup> |
| rs12639182 | 3 | 38711234  | SCN5A | Downstream | 0.98 | 6.40E-01 | C | T | 0.84 (0.55 - 1.27) | 4.01 X 10 <sup>-01</sup> | 0.92 (0.66 - 1.30) | 6.46 X 10 <sup>-01</sup> |
| rs7372391  | 3 | 38712647  | SCN5A | Downstream | 0.98 | 2.93E-02 | C | T | 0.84 (0.54 - 1.30) | 4.27 X 10 <sup>-01</sup> | 0.97 (0.68 - 1.40) | 8.80 X 10 <sup>-01</sup> |
| rs11129799 | 3 | 38717233  | SCN5A | Intron     | 0.99 | 3.20E-01 | C | T | 1.10 (0.72 - 1.66) | 6.70 X 10 <sup>-01</sup> | 1.06 (0.76 - 1.47) | 7.34 X 10 <sup>-01</sup> |
| rs11129800 | 3 | 38719374  | SCN5A | Intron     | 0.95 | 2.89E-01 | C | T | 0.92 (0.65 - 1.30) | 6.36 X 10 <sup>-01</sup> | 0.83 (0.63 - 1.10) | 1.92 X 10 <sup>-01</sup> |
| rs7428538  | 3 | 38721247  | SCN5A | Intron     | 0.99 | 1.09E-01 | C | T | 1.32 (0.82 - 2.11) | 2.50 X 10 <sup>-01</sup> | 1.10 (0.76 - 1.60) | 6.14 X 10 <sup>-01</sup> |
| rs11129801 | 3 | 38725379  | SCN5A | Intron     | 0.98 | 7.24E-01 | A | G | 1.00 (0.70 - 1.42) | 9.84 X 10 <sup>-01</sup> | 1.11 (0.83 - 1.49) | 4.77 X 10 <sup>-01</sup> |
| rs6794914  | 3 | 38732239  | SCN5A | Intron     | 0.99 | 1.73E-01 | C | T | 1.44 (0.95 - 2.18) | 8.80 X 10 <sup>-02</sup> | 1.24 (0.91 - 1.68) | 1.77 X 10 <sup>-01</sup> |
| rs9990137  | 3 | 38734469  | SCN5A | Intron     | 0.98 | 7.92E-01 | A | G | 0.82 (0.58 - 1.18) | 2.85 X 10 <sup>-01</sup> | 1.01 (0.77 - 1.34) | 9.35 X 10 <sup>-01</sup> |
| rs7617547  | 3 | 38738504  | SCN5A | Intron     | 0.95 | 1.70E-01 | C | G | 1.07 (0.76 - 1.50) | 6.96 X 10 <sup>-01</sup> | 1.02 (0.78 - 1.33) | 8.89 X 10 <sup>-01</sup> |
| rs6791171  | 3 | 38741705  | SCN5A | Exon       | 0.99 | 7.90E-01 | A | T | 1.42 (0.92 - 2.19) | 1.14 X 10 <sup>-01</sup> | 1.29 (0.92 - 1.81) | 1.44 X 10 <sup>-01</sup> |
| rs11129804 | 3 | 38741829  | SCN5A | Intron     | 0.97 | 2.29E-01 | C | G | 0.67 (0.35 - 1.30) | 2.35 X 10 <sup>-01</sup> | 0.84 (0.49 - 1.45) | 5.26 X 10 <sup>-01</sup> |
| rs6780103  | 3 | 38748468  | SCN5A | Intron     | 0.98 | 2.34E-01 | A | G | 1.31 (0.92 - 1.85) | 1.33 X 10 <sup>-01</sup> | 1.17 (0.89 - 1.53) | 2.70 X 10 <sup>-01</sup> |
| rs7431144  | 3 | 38769272  | SCN5A | Intron     | 0.92 | 4.23E-03 | A | T | 0.81 (0.47 - 1.40) | 4.55 X 10 <sup>-01</sup> | 1.37 (0.87 - 2.14) | 1.74 X 10 <sup>-01</sup> |
| rs6599254  | 3 | 38770559  | SCN5A | Intron     | 0.98 | 9.58E-01 | A | G | 1.06 (0.76 - 1.48) | 7.49 X 10 <sup>-01</sup> | 1.04 (0.79 - 1.36) | 7.92 X 10 <sup>-01</sup> |
| rs6763876  | 3 | 38775751  | SCN5A | Intron     | 0.99 | 8.14E-01 | C | T | 0.88 (0.62 - 1.25) | 4.77 X 10 <sup>-01</sup> | 1.01 (0.76 - 1.35) | 9.43 X 10 <sup>-01</sup> |
| rs9637536  | 3 | 38775877  | SCN5A | Intron     | 0.99 | 1.64E-01 | A | G | 1.14 (0.74 - 1.75) | 5.52 X 10 <sup>-01</sup> | 1.08 (0.75 - 1.56) | 6.74 X 10 <sup>-01</sup> |
| rs7430438  | 3 | 38778622  | SCN5A | Intron     | 0.97 | 3.19E-01 | A | G | 0.81 (0.58 - 1.13) | 2.14 X 10 <sup>-01</sup> | 0.88 (0.68 - 1.14) | 3.28 X 10 <sup>-01</sup> |
| rs6599257  | 3 | 38779592  | SCN5A | Intron     | 0.98 | 8.58E-01 | C | T | 0.84 (0.60 - 1.19) | 3.35 X 10 <sup>-01</sup> | 1.00 (0.75 - 1.32) | 9.73 X 10 <sup>-01</sup> |
| rs11708587 | 3 | 38789552  | SCN5A | Intron     | 0.99 | 1.21E-01 | C | T | 0.76 (0.40 - 1.45) | 4.05 X 10 <sup>-01</sup> | 0.55 (0.34 - 0.89) | 1.45 X 10 <sup>-02</sup> |
| rs11716493 | 3 | 38789887  | SCN5A | Intron     | 0.98 | 2.72E-03 | A | G | 0.88 (0.62 - 1.24) | 4.57 X 10 <sup>-01</sup> | 0.75 (0.56 - 1.00) | 4.98 X 10 <sup>-02</sup> |
| rs2121928  | 4 | 114187071 | ANK2  | Intron     | 0.98 | 4.73E-01 | C | G | 1.02 (0.74 - 1.40) | 9.03 X 10 <sup>-01</sup> | 1.17 (0.90 - 1.53) | 2.43 X 10 <sup>-01</sup> |
| rs12503758 | 4 | 114206646 | ANK2  | Intron     | 0.99 | 5.17E-03 | A | T | 1.01 (0.71 - 1.44) | 9.43 X 10 <sup>-01</sup> | 1.20 (0.89 - 1.61) | 2.24 X 10 <sup>-01</sup> |
| rs6533660  | 4 | 114218524 | ANK2  | Intron     | 0.98 | 1.76E-01 | A | G | 0.94 (0.67 - 1.33) | 7.22 X 10 <sup>-01</sup> | 1.11 (0.84 - 1.47) | 4.59 X 10 <sup>-01</sup> |
| rs7695624  | 4 | 114219960 | ANK2  | Intron     | 0.98 | 9.47E-01 | C | G | 0.85 (0.59 - 1.23) | 3.86 X 10 <sup>-01</sup> | 0.95 (0.70 - 1.29) | 7.60 X 10 <sup>-01</sup> |
| rs12506747 | 4 | 114223985 | ANK2  | Intron     | 0.96 | 6.21E-04 | C | T | 1.05 (0.67 - 1.65) | 8.25 X 10 <sup>-01</sup> | 1.08 (0.76 - 1.54) | 6.76 X 10 <sup>-01</sup> |
| rs7678728  | 4 | 114226211 | ANK2  | Intron     | 0.98 | 4.66E-02 | G | T | 1.27 (0.89 - 1.81) | 1.86 X 10 <sup>-01</sup> | 1.19 (0.89 - 1.57) | 2.42 X 10 <sup>-01</sup> |
| rs10030826 | 4 | 114234126 | ANK2  | Intron     | 0.96 | 8.06E-01 | A | G | 0.96 (0.69 - 1.32) | 7.91 X 10 <sup>-01</sup> | 1.12 (0.87 - 1.44) | 3.89 X 10 <sup>-01</sup> |
| rs2352221  | 4 | 114253077 | ANK2  | Intron     | 0.99 | 9.36E-02 | A | G | 0.70 (0.49 - 1.01) | 5.41 X 10 <sup>-02</sup> | 0.82 (0.62 - 1.09) | 1.76 X 10 <sup>-01</sup> |
| rs6820742  | 4 | 114273251 | ANK2  | Intron     | 0.98 | 1.00E+00 | A | G | 0.72 (0.49 - 1.06) | 9.89 X 10 <sup>-02</sup> | 0.94 (0.68 - 1.28) | 6.79 X 10 <sup>-01</sup> |
| rs6818050  | 4 | 114276148 | ANK2  | Intron     | 0.98 | 7.63E-01 | C | T | 0.75 (0.52 - 1.09) | 1.37 X 10 <sup>-01</sup> | 0.74 (0.54 - 1.00) | 5.24 X 10 <sup>-02</sup> |
| rs12507075 | 4 | 114276787 | ANK2  | Intron     | 0.97 | 7.62E-01 | A | G | 0.79 (0.55 - 1.14) | 2.07 X 10 <sup>-01</sup> | 0.80 (0.59 - 1.09) | 1.53 X 10 <sup>-01</sup> |
| rs6812106  | 4 | 114278709 | ANK2  | Intron     | 0.98 | 1.20E-01 | C | T | 0.72 (0.46 - 1.12) | 1.45 X 10 <sup>-01</sup> | 0.70 (0.48 - 1.03) | 7.04 X 10 <sup>-02</sup> |
| rs1532876  | 4 | 114286078 | ANK2  | Intron     | 0.98 | 1.30E-01 | C | G | 0.57 (0.33 - 0.97) | 3.91 X 10 <sup>-02</sup> | 0.46 (0.30 - 0.72) | 6.97 X 10 <sup>-04</sup> |
| rs961295   | 4 | 114291380 | ANK2  | Intron     | 0.93 | 6.52E-01 | C | T | 0.63 (0.44 - 0.89) | 1.02 X 10 <sup>-02</sup> | 0.73 (0.54 - 0.99) | 4.27 X 10 <sup>-02</sup> |
| rs17618813 | 4 | 114291638 | ANK2  | Intron     | 0.99 | 1.81E-01 | C | T | 1.46 (0.98 - 2.16) | 6.07 X 10 <sup>-02</sup> | 1.11 (0.82 - 1.51) | 4.92 X 10 <sup>-01</sup> |
| rs1032913  | 4 | 114296704 | ANK2  | Intron     | 0.99 | 2.10E-01 | C | T | 0.61 (0.40 - 0.91) | 1.72 X 10 <sup>-02</sup> | 0.55 (0.38 - 0.79) | 1.14 X 10 <sup>-03</sup> |
| rs1395112  | 4 | 114303988 | ANK2  | Intron     | 0.98 | 2.57E-01 | A | G | 0.62 (0.44 - 0.87) | 6.35 X 10 <sup>-03</sup> | 0.72 (0.54 - 0.96) | 2.38 X 10 <sup>-02</sup> |
| rs10155397 | 4 | 114309176 | ANK2  | Intron     | 0.98 | 5.49E-01 | A | G | 0.66 (0.46 - 0.94) | 2.10 X 10 <sup>-02</sup> | 0.92 (0.69 - 1.23) | 5.87 X 10 <sup>-01</sup> |
| rs1395114  | 4 | 114311185 | ANK2  | Intron     | 0.98 | 3.99E-01 | C | T | 1.02 (0.68 - 1.52) | 9.36 X 10 <sup>-01</sup> | 1.18 (0.85 - 1.64) | 3.12 X 10 <sup>-01</sup> |

|            |   |           |      |          |      |          |   |   |                    |                          |                    |                          |
|------------|---|-----------|------|----------|------|----------|---|---|--------------------|--------------------------|--------------------|--------------------------|
| rs10155204 | 4 | 114315618 | ANK2 |          | 0.98 | 9.16E-01 | C | T | 0.48 (0.27 - 0.83) | 8.96 X 10 <sup>-03</sup> | 0.62 (0.39 - 0.99) | 4.43 X 10 <sup>-02</sup> |
| rs7673390  | 4 | 114316788 | ANK2 |          | 0.99 | 1.88E-02 | C | T | 0.85 (0.57 - 1.28) | 4.46 X 10 <sup>-01</sup> | 0.97 (0.69 - 1.35) | 8.47 X 10 <sup>-01</sup> |
| rs10015551 | 4 | 114318643 | ANK2 | Promoter | 0.98 | 6.41E-01 | G | T | 0.67 (0.48 - 0.94) | 2.24 X 10 <sup>-02</sup> | 0.80 (0.61 - 1.06) | 1.22 X 10 <sup>-01</sup> |
| rs1716051  | 4 | 114321892 | ANK2 | Promoter | 0.99 | 3.15E-01 | C | T | 0.81 (0.53 - 1.24) | 3.36 X 10 <sup>-01</sup> | 1.14 (0.80 - 1.62) | 4.72 X 10 <sup>-01</sup> |
| rs6856101  | 4 | 114325764 | ANK2 | Promoter | 0.97 | 2.90E-01 | A | G | 0.76 (0.52 - 1.10) | 1.42 X 10 <sup>-01</sup> | 0.84 (0.63 - 1.13) | 2.59 X 10 <sup>-01</sup> |
| rs11098185 | 4 | 114325812 | ANK2 | Promoter | 0.98 | 9.05E-01 | C | T | 0.97 (0.68 - 1.39) | 8.73 X 10 <sup>-01</sup> | 1.10 (0.83 - 1.46) | 5.02 X 10 <sup>-01</sup> |
| rs1026975  | 4 | 114328978 | ANK2 | Intron   | 0.98 | 5.69E-01 | G | T | 0.86 (0.56 - 1.30) | 4.67 X 10 <sup>-01</sup> | 0.98 (0.70 - 1.36) | 9.02 X 10 <sup>-01</sup> |
| rs313942   | 4 | 114330460 | ANK2 | Intron   | 0.98 | 4.47E-01 | A | G | 1.12 (0.79 - 1.57) | 5.28 X 10 <sup>-01</sup> | 1.06 (0.80 - 1.39) | 6.81 X 10 <sup>-01</sup> |
| rs931838   | 4 | 114331556 | ANK2 | Intron   | 0.98 | 6.92E-01 | C | T | 1.03 (0.73 - 1.45) | 8.58 X 10 <sup>-01</sup> | 1.03 (0.79 - 1.33) | 8.39 X 10 <sup>-01</sup> |
| rs10007543 | 4 | 114334435 | ANK2 | Intron   | 0.99 | 2.44E-02 | A | G | 0.84 (0.50 - 1.40) | 5.08 X 10 <sup>-01</sup> | 0.77 (0.51 - 1.16) | 2.07 X 10 <sup>-01</sup> |
| rs313985   | 4 | 114335883 | ANK2 | Intron   | 0.98 | 2.55E-01 | A | G | 1.15 (0.77 - 1.72) | 4.93 X 10 <sup>-01</sup> | 0.96 (0.70 - 1.32) | 8.17 X 10 <sup>-01</sup> |
| rs313979   | 4 | 114339381 | ANK2 | Intron   | 0.98 | 8.66E-02 | C | T | 0.81 (0.50 - 1.31) | 3.88 X 10 <sup>-01</sup> | 0.86 (0.58 - 1.29) | 4.67 X 10 <sup>-01</sup> |
| rs678035   | 4 | 114344344 | ANK2 | Intron   | 0.98 | 3.47E-01 | A | G | 1.17 (0.78 - 1.77) | 4.46 X 10 <sup>-01</sup> | 1.01 (0.73 - 1.40) | 9.60 X 10 <sup>-01</sup> |
| rs11726017 | 4 | 114344973 | ANK2 | Intron   | 0.99 | 7.95E-01 | A | G | 0.84 (0.56 - 1.25) | 3.82 X 10 <sup>-01</sup> | 0.96 (0.68 - 1.36) | 8.19 X 10 <sup>-01</sup> |
| rs7690846  | 4 | 114345649 | ANK2 | Intron   | 0.98 | 5.59E-01 | C | T | 0.94 (0.68 - 1.30) | 7.17 X 10 <sup>-01</sup> | 1.01 (0.78 - 1.31) | 9.48 X 10 <sup>-01</sup> |
| rs632895   | 4 | 114346117 | ANK2 | Intron   | 0.99 | 9.24E-01 | A | T | 0.79 (0.49 - 1.27) | 3.32 X 10 <sup>-01</sup> | 0.93 (0.63 - 1.39) | 7.39 X 10 <sup>-01</sup> |
| rs4834311  | 4 | 114348547 | ANK2 | Intron   | 0.99 | 8.83E-01 | C | G | 1.05 (0.75 - 1.46) | 7.83 X 10 <sup>-01</sup> | 1.02 (0.79 - 1.33) | 8.56 X 10 <sup>-01</sup> |
| rs2279891  | 4 | 114348620 | ANK2 | Intron   | 0.96 | 1.08E-01 | C | T | 1.19 (0.80 - 1.75) | 3.87 X 10 <sup>-01</sup> | 0.99 (0.73 - 1.33) | 9.27 X 10 <sup>-01</sup> |
| rs2279894  | 4 | 114349396 | ANK2 | Intron   | 0.97 | 8.82E-01 | C | G | 1.03 (0.74 - 1.45) | 8.43 X 10 <sup>-01</sup> | 1.00 (0.77 - 1.30) | 9.87 X 10 <sup>-01</sup> |
| rs2135354  | 4 | 114359491 | ANK2 | Intron   | 0.98 | 8.91E-02 | C | T | 0.91 (0.65 - 1.27) | 5.71 X 10 <sup>-01</sup> | 0.98 (0.75 - 1.27) | 8.67 X 10 <sup>-01</sup> |
| rs313966   | 4 | 114363870 | ANK2 | Intron   | 0.98 | 4.35E-01 | C | T | 0.97 (0.70 - 1.34) | 8.48 X 10 <sup>-01</sup> | 1.07 (0.83 - 1.37) | 5.91 X 10 <sup>-01</sup> |
| rs649022   | 4 | 114367489 | ANK2 | Intron   | 0.99 | 5.23E-14 | A | G | 1.03 (0.76 - 1.39) | 8.53 X 10 <sup>-01</sup> | 1.03 (0.82 - 1.31) | 7.78 X 10 <sup>-01</sup> |
| rs10029516 | 4 | 114368692 | ANK2 | Intron   | 0.9  | 4.87E-83 | G | T | 1.19 (0.89 - 1.57) | 2.36 X 10 <sup>-01</sup> | 1.28 (1.02 - 1.62) | 3.48 X 10 <sup>-02</sup> |
| rs4834314  | 4 | 114370307 | ANK2 | Intron   | 0.99 | 5.42E-02 | C | T | 1.08 (0.72 - 1.62) | 7.16 X 10 <sup>-01</sup> | 0.96 (0.69 - 1.33) | 8.04 X 10 <sup>-01</sup> |
| rs17045537 | 4 | 114370612 | ANK2 | Intron   | 0.97 | 9.46E-01 | A | G | 1.19 (0.80 - 1.77) | 3.82 X 10 <sup>-01</sup> | 0.96 (0.70 - 1.31) | 7.77 X 10 <sup>-01</sup> |
| rs11726041 | 4 | 114370962 | ANK2 | Intron   | 0.98 | 8.25E-02 | A | T | 0.95 (0.66 - 1.36) | 7.77 X 10 <sup>-01</sup> | 1.11 (0.84 - 1.46) | 4.77 X 10 <sup>-01</sup> |
| rs6533666  | 4 | 114373140 | ANK2 | Intron   | 0.98 | 9.17E-01 | C | G | 0.77 (0.55 - 1.08) | 1.32 X 10 <sup>-01</sup> | 1.03 (0.79 - 1.34) | 8.37 X 10 <sup>-01</sup> |
| rs2046444  | 4 | 114373707 | ANK2 | Intron   | 0.99 | 4.96E-01 | C | G | 0.90 (0.64 - 1.27) | 5.55 X 10 <sup>-01</sup> | 0.98 (0.74 - 1.30) | 8.95 X 10 <sup>-01</sup> |
| rs695002   | 4 | 114375568 | ANK2 | Intron   | 0.99 | 9.61E-01 | C | T | 1.21 (0.86 - 1.72) | 2.72 X 10 <sup>-01</sup> | 1.00 (0.77 - 1.30) | 9.98 X 10 <sup>-01</sup> |
| rs7660069  | 4 | 114379606 | ANK2 | Intron   | 0.98 | 6.92E-01 | G | T | 1.25 (0.89 - 1.75) | 2.07 X 10 <sup>-01</sup> | 1.02 (0.78 - 1.32) | 9.13 X 10 <sup>-01</sup> |
| rs313956   | 4 | 114381453 | ANK2 | Intron   | 0.99 | 1.38E-01 | A | G | 1.09 (0.75 - 1.59) | 6.46 X 10 <sup>-01</sup> | 1.02 (0.75 - 1.39) | 9.02 X 10 <sup>-01</sup> |
| rs313958   | 4 | 114381696 | ANK2 | Intron   | 0.98 | 8.82E-01 | A | G | 1.08 (0.72 - 1.61) | 7.27 X 10 <sup>-01</sup> | 0.90 (0.64 - 1.25) | 5.16 X 10 <sup>-01</sup> |
| rs1385662  | 4 | 114384123 | ANK2 | Intron   | 0.98 | 4.28E-02 | C | T | 1.10 (0.73 - 1.65) | 6.64 X 10 <sup>-01</sup> | 0.95 (0.68 - 1.33) | 7.79 X 10 <sup>-01</sup> |
| rs17626050 | 4 | 114388243 | ANK2 | Intron   | 0.98 | 6.07E-02 | A | G | 0.88 (0.56 - 1.38) | 5.68 X 10 <sup>-01</sup> | 0.93 (0.64 - 1.36) | 7.20 X 10 <sup>-01</sup> |
| rs17045600 | 4 | 114391220 | ANK2 | Intron   | 0.97 | 1.00E+00 | C | T | 1.08 (0.79 - 1.49) | 6.20 X 10 <sup>-01</sup> | 1.11 (0.85 - 1.45) | 4.46 X 10 <sup>-01</sup> |
| rs6533668  | 4 | 114391826 | ANK2 | Intron   | 0.96 | 1.23E+00 | A | C | 0.92 (0.65 - 1.29) | 6.12 X 10 <sup>-01</sup> | 1.01 (0.77 - 1.33) | 9.41 X 10 <sup>-01</sup> |
| rs17045612 | 4 | 114393214 | ANK2 | Intron   | 0.99 | 5.64E-01 | A | C | 1.04 (0.70 - 1.54) | 8.57 X 10 <sup>-01</sup> | 1.05 (0.76 - 1.45) | 7.52 X 10 <sup>-01</sup> |
| rs17683014 | 4 | 114401755 | ANK2 | Intron   | 0.98 | 3.14E-01 | A | T | 1.20 (0.75 - 1.91) | 4.44 X 10 <sup>-01</sup> | 0.96 (0.67 - 1.39) | 8.41 X 10 <sup>-01</sup> |
| rs17045646 | 4 | 114408195 | ANK2 | Intron   | 0.99 | 3.27E-03 | C | T | 0.85 (0.54 - 1.34) | 4.83 X 10 <sup>-01</sup> | 0.93 (0.66 - 1.31) | 6.64 X 10 <sup>-01</sup> |
| rs10003143 | 4 | 114410314 | ANK2 | Intron   | 0.99 | 7.30E-02 | A | C | 0.83 (0.60 - 1.15) | 2.73 X 10 <sup>-01</sup> | 0.94 (0.73 - 1.22) | 6.64 X 10 <sup>-01</sup> |
| rs2202535  | 4 | 114412955 | ANK2 | Intron   | 0.99 | 2.44E-01 | A | G | 0.76 (0.46 - 1.26) | 2.83 X 10 <sup>-01</sup> | 0.96 (0.63 - 1.46) | 8.46 X 10 <sup>-01</sup> |
| rs13135212 | 4 | 114415963 | ANK2 | Intron   | 0.98 | 7.80E-01 | C | T | 1.36 (0.92 - 2.02) | 1.19 X 10 <sup>-01</sup> | 1.07 (0.80 - 1.45) | 6.39 X 10 <sup>-01</sup> |
| rs4834317  | 4 | 114418138 | ANK2 | Intron   | 0.97 | 9.79E-02 | C | G | 0.93 (0.67 - 1.28) | 6.49 X 10 <sup>-01</sup> | 1.01 (0.78 - 1.30) | 9.57 X 10 <sup>-01</sup> |
| rs17676256 | 4 | 114419140 | ANK2 | Intron   | 0.98 | 7.11E-03 | A | G | 1.06 (0.65 - 1.75) | 8.07 X 10 <sup>-01</sup> | 1.11 (0.76 - 1.62) | 5.94 X 10 <sup>-01</sup> |
| rs17579878 | 4 | 114423937 | ANK2 | Intron   | 0.96 | 1.09E-01 | A | G | 1.28 (0.81 - 2.01) | 2.88 X 10 <sup>-01</sup> | 1.06 (0.74 - 1.50) | 7.66 X 10 <sup>-01</sup> |
| rs3112980  | 4 | 114424743 | ANK2 | Intron   | 0.99 | 5.99E-01 | A | G | 0.79 (0.49 - 1.28) | 3.45 X 10 <sup>-01</sup> | 0.90 (0.60 - 1.34) | 6.02 X 10 <sup>-01</sup> |
| rs3112981  | 4 | 114424837 | ANK2 | Intron   | 0.98 | 7.58E-01 | A | G | 1.15 (0.83 - 1.60) | 3.99 X 10 <sup>-01</sup> | 1.07 (0.82 - 1.40) | 5.98 X 10 <sup>-01</sup> |
| rs13146022 | 4 | 114426435 | ANK2 | Intron   | 0.98 | 8.98E-01 | C | T | 1.11 (0.76 - 1.62) | 5.83 X 10 <sup>-01</sup> | 0.89 (0.66 - 1.21) | 4.62 X 10 <sup>-01</sup> |
| rs1351998  | 4 | 114426531 | ANK2 | Intron   | 0.98 | 5.14E-01 | C | G | 0.94 (0.68 - 1.31) | 7.33 X 10 <sup>-01</sup> | 0.96 (0.73 - 1.25) | 7.49 X 10 <sup>-01</sup> |
| rs13125789 | 4 | 114427268 | ANK2 | Intron   | 0.99 | 5.21E-01 | A | C | 1.07 (0.71 - 1.61) | 7.39 X 10 <sup>-01</sup> | 0.99 (0.72 - 1.38) | 9.71 X 10 <sup>-01</sup> |
| rs10028798 | 4 | 114434133 | ANK2 | Intron   | 0.98 | 8.16E-01 | A | G | 1.04 (0.73 - 1.47) | 8.30 X 10 <sup>-01</sup> | 0.94 (0.70 - 1.26) | 6.87 X 10 <sup>-01</sup> |
| rs7679631  | 4 | 114435591 | ANK2 | Intron   | 0.97 | 1.44E-01 | C | T | 1.03 (0.75 - 1.41) | 8.78 X 10 <sup>-01</sup> | 1.17 (0.89 - 1.53) | 2.51 X 10 <sup>-01</sup> |
| rs13134375 | 4 | 114436535 | ANK2 | Intron   | 0.98 | 2.64E-01 | C | T | 1.07 (0.77 - 1.48) | 7.06 X 10 <sup>-01</sup> | 0.94 (0.72 - 1.21) | 6.15 X 10 <sup>-01</sup> |
| rs17444886 | 4 | 114438156 | ANK2 | Intron   | 0.99 | 6.53E-01 | A | G | 1.02 (0.62 - 1.66) | 9.43 X 10 <sup>-01</sup> | 0.88 (0.59 - 1.30) | 5.13 X 10 <sup>-01</sup> |
| rs17590593 | 4 | 114439625 | ANK2 | Intron   | 0.98 | 5.29E-01 | A | G | 1.06 (0.77 - 1.47) | 7.22 X 10 <sup>-01</sup> | 1.21 (0.92 - 1.59) | 1.79 X 10 <sup>-01</sup> |
| rs4627864  | 4 | 114439927 | ANK2 | Intron   | 0.94 | 4.42E-01 | A | G | 0.94 (0.69 - 1.29) | 7.10 X 10 <sup>-01</sup> | 0.98 (0.75 - 1.28) | 8.71 X 10 <sup>-01</sup> |
| rs400883   | 4 | 114441342 | ANK2 | Intron   | 0.98 | 1.07E-01 | A | C | 0.95 (0.66 - 1.35) | 7.62 X 10 <sup>-01</sup> | 1.09 (0.81 - 1.48) | 5.68 X 10 <sup>-01</sup> |
| rs2107026  | 4 | 114441433 | ANK2 | Intron   | 0.99 | 1.24E-01 | A | T | 1.06 (0.70 - 1.60) | 7.84 X 10 <sup>-01</sup> | 1.03 (0.73 - 1.44) | 8.81 X 10 <sup>-01</sup> |
| rs407709   | 4 | 114443052 | ANK2 | Intron   | 0.98 | 7.45E-01 | A | T | 0.91 (0.65 - 1.27) | 5.62 X 10 <sup>-01</sup> | 0.89 (0.67 - 1.18) | 4.14 X 10 <sup>-01</sup> |
| rs7697503  | 4 | 114443725 | ANK2 | Intron   | 0.97 | 7.23E-01 | C | T | 1.07 (0.76 - 1.49) | 7.06 X 10 <sup>-01</sup> | 0.96 (0.74 - 1.26) | 7.78 X 10 <sup>-01</sup> |
| rs6814622  | 4 | 114444959 | ANK2 | Intron   | 0.99 | 2.50E-01 | A | C | 1.14 (0.77 - 1.70) | 5.09 X 10 <sup>-01</sup> | 0.98 (0.71 - 1.35) | 8.93 X 10 <sup>-01</sup> |
| rs4833422  | 4 | 114447347 | ANK2 | Intron   | 0.99 | 8.46E-02 | C | T | 0.98 (0.59 - 1.62) | 9.29 X 10 <sup>-01</sup> | 0.87 (0.59 - 1.30) | 5.02 X 10 <sup>-01</sup> |
| rs2158199  | 4 | 114458085 | ANK2 | Intron   | 0.99 | 5.84E-01 | C | T | 1.02 (0.73 - 1.41) | 9.25 X 10 <sup>-01</sup> | 1.12 (0.86 - 1.46) | 4.01 X 10 <sup>-01</sup> |
| rs6858425  | 4 | 114463380 | ANK2 | Intron   | 0.98 | 5.06E-01 | C | T | 1.06 (0.75 - 1.50) | 7.33 X 10 <sup>-01</sup> | 1.10 (0.82 - 1.48) | 5.33 X 10 <sup>-01</sup> |



|            |    |           |       |            |      |           |   |   |                    |                          |                    |                          |
|------------|----|-----------|-------|------------|------|-----------|---|---|--------------------|--------------------------|--------------------|--------------------------|
| rs6977081  | 7  | 149980163 | KCNH2 | Promoter   | 0.98 | 4.02E-01  | G | T | 1.12 (0.80 - 1.56) | 5.06 X 10 <sup>-01</sup> | 1.18 (0.91 - 1.53) | 2.14 X 10 <sup>-01</sup> |
| rs6977381  | 7  | 149980294 | KCNH2 | Promoter   | 0.99 | 3.06E-01  | A | G | 0.90 (0.65 - 1.23) | 5.08 X 10 <sup>-01</sup> | 0.76 (0.59 - 0.98) | 3.30 X 10 <sup>-02</sup> |
| rs887588   | 7  | 149980786 | KCNH2 | Promoter   | 0.98 | 4.65E-01  | C | T | 1.09 (0.76 - 1.54) | 6.50 X 10 <sup>-01</sup> | 0.97 (0.73 - 1.28) | 8.17 X 10 <sup>-01</sup> |
| rs1005389  | 7  | 149981296 | KCNH2 | Promoter   | 0.99 | 8.71E-01  | C | G | 1.05 (0.69 - 1.60) | 8.22 X 10 <sup>-01</sup> | 1.25 (0.89 - 1.75) | 2.01 X 10 <sup>-01</sup> |
| rs887587   | 7  | 149981615 | KCNH2 | Promoter   | 0.99 | 6.25E-01  | A | T | 1.06 (0.75 - 1.51) | 7.32 X 10 <sup>-01</sup> | 1.27 (0.95 - 1.69) | 1.03 X 10 <sup>-01</sup> |
| rs10240738 | 7  | 149981782 | KCNH2 | Promoter   | 0.98 | 2.04E-01  | A | T | 1.07 (0.78 - 1.46) | 6.66 X 10 <sup>-01</sup> | 1.42 (1.09 - 1.85) | 9.20 X 10 <sup>-03</sup> |
| rs2268999  | 7  | 149990613 | KCNH2 | Intron     | 0.98 | 4.15E-01  | C | T | 1.03 (0.72 - 1.49) | 8.61 X 10 <sup>-01</sup> | 1.19 (0.88 - 1.60) | 2.54 X 10 <sup>-01</sup> |
| rs1049748  | 7  | 149993650 | KCNH2 | Exon       | 0.98 | 3.97E-01  | C | T | 0.90 (0.65 - 1.25) | 5.32 X 10 <sup>-01</sup> | 1.01 (0.78 - 1.32) | 9.37 X 10 <sup>-01</sup> |
| rs2071517  | 7  | 149996047 | KCNH2 | Downstream | 0.99 | 1.37E-01  | A | G | 0.99 (0.68 - 1.44) | 9.59 X 10 <sup>-01</sup> | 1.18 (0.86 - 1.62) | 3.12 X 10 <sup>-01</sup> |
| rs10250599 | 7  | 150002009 | KCNH2 | Downstream | 0.98 | 2.00E-03  | A | G | 1.09 (0.78 - 1.51) | 6.23 X 10 <sup>-01</sup> | 1.41 (1.08 - 1.84) | 1.21 X 10 <sup>-02</sup> |
| rs10254616 | 7  | 150002868 | KCNH2 | Downstream | 0.98 | 3.31E-01  | A | G | 1.13 (0.81 - 1.56) | 4.70 X 10 <sup>-01</sup> | 0.90 (0.70 - 1.17) | 4.41 X 10 <sup>-01</sup> |
| rs12374688 | 7  | 150003097 | KCNH2 | Downstream | 0.99 | 8.33E-01  | A | G | 0.79 (0.53 - 1.18) | 2.52 X 10 <sup>-01</sup> | 0.80 (0.58 - 1.10) | 1.75 X 10 <sup>-01</sup> |
| rs4725379  | 7  | 150007192 | KCNH2 |            | 0.99 | 5.25E-01  | A | T | 0.91 (0.66 - 1.26) | 5.72 X 10 <sup>-01</sup> | 0.94 (0.72 - 1.22) | 6.35 X 10 <sup>-01</sup> |
| rs758895   | 7  | 150012571 | KCNH2 |            | 0.98 | 1.68E-03  | C | T | 1.47 (0.93 - 2.33) | 9.99 X 10 <sup>-02</sup> | 1.35 (0.95 - 1.93) | 9.56 X 10 <sup>-02</sup> |
| rs12538514 | 7  | 150024078 | KCNH2 |            | 0.98 | 2.62E-01  | C | G | 1.02 (0.72 - 1.44) | 9.10 X 10 <sup>-01</sup> | 0.98 (0.75 - 1.28) | 8.71 X 10 <sup>-01</sup> |
| rs10234348 | 7  | 150026511 | KCNH2 |            | 0.97 | 4.02E-01  | C | T | 1.00 (0.69 - 1.44) | 9.94 X 10 <sup>-01</sup> | 1.24 (0.92 - 1.67) | 1.64 X 10 <sup>-01</sup> |
| rs11762854 | 7  | 150030389 | KCNH2 |            | 0.99 | 5.46E-01  | C | T | 1.25 (0.76 - 2.07) | 3.84 X 10 <sup>-01</sup> | 1.20 (0.80 - 1.79) | 3.78 X 10 <sup>-01</sup> |
| rs12533255 | 7  | 150031066 | KCNH2 |            | 0.98 | 3.14E-01  | C | T | 0.71 (0.47 - 1.07) | 1.03 X 10 <sup>-01</sup> | 0.81 (0.58 - 1.14) | 2.26 X 10 <sup>-01</sup> |
| rs12703105 | 7  | 150032306 | KCNH2 |            | 0.96 | 7.40E-110 | A | C | 0.98 (0.74 - 1.30) | 8.96 X 10 <sup>-01</sup> | 1.22 (0.97 - 1.55) | 9.53 X 10 <sup>-02</sup> |
| rs956642   | 7  | 150034150 | KCNH2 |            | 0.98 | 3.35E-01  | A | G | 1.08 (0.77 - 1.51) | 6.69 X 10 <sup>-01</sup> | 0.86 (0.65 - 1.13) | 2.84 X 10 <sup>-01</sup> |
| rs740954   | 7  | 150036140 | KCNH2 |            | 0.94 | 4.46E-01  | C | T | 0.91 (0.65 - 1.27) | 5.66 X 10 <sup>-01</sup> | 0.88 (0.68 - 1.14) | 3.25 X 10 <sup>-01</sup> |
| rs10216051 | 7  | 150036853 | KCNH2 |            | 0.98 | 4.99E-01  | A | G | 1.49 (1.08 - 2.05) | 1.54 X 10 <sup>-02</sup> | 1.51 (1.16 - 1.96) | 2.25 X 10 <sup>-03</sup> |
| rs9640171  | 7  | 150038493 | KCNH2 |            | 0.94 | 4.78E-08  | A | G | 0.90 (0.60 - 1.35) | 6.12 X 10 <sup>-01</sup> | 0.87 (0.62 - 1.21) | 3.95 X 10 <sup>-01</sup> |
| rs2968858  | 7  | 150043936 | KCNH2 |            | 0.98 | 6.61E-01  | A | G | 1.16 (0.84 - 1.60) | 3.71 X 10 <sup>-01</sup> | 1.08 (0.83 - 1.40) | 5.72 X 10 <sup>-01</sup> |
| rs11762978 | 7  | 150047748 | KCNH2 |            | 0.98 | 1.00E+00  | A | G | 1.10 (0.80 - 1.53) | 5.54 X 10 <sup>-01</sup> | 1.30 (0.99 - 1.71) | 5.70 X 10 <sup>-02</sup> |
| rs7782274  | 7  | 150052506 | KCNH2 |            | 0.98 | 7.91E-01  | C | T | 1.09 (0.71 - 1.68) | 6.85 X 10 <sup>-01</sup> | 1.17 (0.82 - 1.66) | 3.79 X 10 <sup>-01</sup> |
| rs6972137  | 7  | 150058349 | KCNH2 |            | 0.98 | 1.00E+00  | G | T | 1.35 (0.91 - 2.01) | 1.41 X 10 <sup>-01</sup> | 1.31 (0.93 - 1.83) | 1.22 X 10 <sup>-01</sup> |
| rs4725982  | 7  | 150075511 | KCNH2 | Downstream | 0.98 | 8.90E-02  | C | T | 1.47 (1.01 - 2.14) | 4.62 X 10 <sup>-02</sup> | 1.35 (1.00 - 1.82) | 5.05 X 10 <sup>-02</sup> |
| rs1547958  | 7  | 150077933 | KCNH2 | Downstream | 0.98 | 1.48E-01  | A | G | 0.73 (0.50 - 1.07) | 1.08 X 10 <sup>-01</sup> | 0.77 (0.57 - 1.06) | 1.06 X 10 <sup>-01</sup> |
| rs1805123  | 7  | 150083182 | KCNH2 | Exon       | 0.95 | 3.24E-02  | A | C | 0.75 (0.51 - 1.10) | 1.44 X 10 <sup>-01</sup> | 0.80 (0.59 - 1.10) | 1.69 X 10 <sup>-01</sup> |
| rs2968857  | 7  | 150099978 | KCNH2 | Intron     | 0.99 | 7.98E-01  | C | T | 1.02 (0.72 - 1.44) | 9.24 X 10 <sup>-01</sup> | 0.86 (0.66 - 1.13) | 2.92 X 10 <sup>-01</sup> |
| rs3807375  | 7  | 150104858 | KCNH2 | Intron     | 0.98 | 4.32E-02  | A | G | 1.12 (0.82 - 1.53) | 4.80 X 10 <sup>-01</sup> | 1.40 (1.07 - 1.83) | 1.36 X 10 <sup>-02</sup> |
| rs10236214 | 7  | 150105718 | KCNH2 | Intron     | 0.99 | 3.17E-01  | C | T | 0.83 (0.6 - 1.14)  | 2.48 X 10 <sup>-01</sup> | 0.77 (0.59 - 1.01) | 6.13 X 10 <sup>-02</sup> |
| rs3807373  | 7  | 150106369 | KCNH2 | Intron     | 0.93 | 1.46E-09  | C | T | 1.08 (0.71 - 1.65) | 7.16 X 10 <sup>-01</sup> | 0.92 (0.65 - 1.28) | 6.11 X 10 <sup>-01</sup> |
| rs3807372  | 7  | 150106705 | KCNH2 | Intron     | 0.99 | 1.54E-01  | C | T | 0.96 (0.64 - 1.45) | 8.51 X 10 <sup>-01</sup> | 1.28 (0.92 - 1.79) | 1.48 X 10 <sup>-01</sup> |
| rs1036145  | 7  | 150112078 | KCNH2 | Intron     | 0.99 | 7.87E-01  | A | G | 0.76 (0.54 - 1.08) | 1.21 X 10 <sup>-01</sup> | 0.81 (0.61 - 1.08) | 1.57 X 10 <sup>-01</sup> |
| rs2373961  | 7  | 150118858 | KCNH2 | Promoter   | 0.97 | 2.93E-01  | A | G | 0.74 (0.53 - 1.04) | 8.55 X 10 <sup>-02</sup> | 0.79 (0.60 - 1.06) | 1.15 X 10 <sup>-01</sup> |
| rs10277237 | 7  | 150120992 | KCNH2 | Promoter   | 0.99 | 2.86E-02  | A | G | 1.40 (0.97 - 2.02) | 7.00 X 10 <sup>-02</sup> | 1.39 (1.04 - 1.84) | 2.49 X 10 <sup>-02</sup> |
| rs1799983  | 7  | 150133759 | KCNH2 | Exon       | 0.97 | 7.40E-01  | A | T | 1.19 (0.84 - 1.68) | 3.29 X 10 <sup>-01</sup> | 1.06 (0.80 - 1.39) | 6.83 X 10 <sup>-01</sup> |
| rs3918227  | 7  | 150138594 | KCNH2 | Intron     | 0.99 | 4.18E-01  | A | C | 1.05 (0.61 - 1.83) | 8.54 X 10 <sup>-01</sup> | 1.09 (0.69 - 1.70) | 7.22 X 10 <sup>-01</sup> |
| rs743507   | 7  | 150145136 | KCNH2 | Intron     | 0.97 | 3.81E-01  | A | G | 1.44 (1.00 - 2.08) | 5.03 X 10 <sup>-02</sup> | 1.06 (0.79 - 1.40) | 7.13 X 10 <sup>-01</sup> |
| rs2373929  | 7  | 150152460 | KCNH2 | Intron     | 0.99 | 8.04E-01  | C | T | 0.80 (0.58 - 1.11) | 1.81 X 10 <sup>-01</sup> | 1.05 (0.81 - 1.36) | 7.18 X 10 <sup>-01</sup> |
| rs2303922  | 7  | 150163370 | KCNH2 | Intron     | 0.97 | 7.11E-01  | A | C | 0.91 (0.66 - 1.27) | 5.92 X 10 <sup>-01</sup> | 1.15 (0.87 - 1.50) | 3.26 X 10 <sup>-01</sup> |
| rs2303928  | 7  | 150176978 | KCNH2 | Intron     | 0.98 | 4.13E-01  | C | G | 1.21 (0.87 - 1.69) | 2.62 X 10 <sup>-01</sup> | 0.96 (0.73 - 1.26) | 7.73 X 10 <sup>-01</sup> |
| rs2288645  | 7  | 150185394 | KCNH2 | Intron     | 0.98 | 2.85E-01  | A | G | 1.52 (1.00 - 2.30) | 5.20 X 10 <sup>-02</sup> | 1.06 (0.76 - 1.49) | 7.40 X 10 <sup>-01</sup> |
| rs2069459  | 7  | 150189238 | KCNH2 | Intron     | 0.96 | 4.04E-01  | A | T | 1.08 (0.78 - 1.50) | 6.44 X 10 <sup>-01</sup> | 1.02 (0.78 - 1.34) | 8.75 X 10 <sup>-01</sup> |
| rs1549760  | 7  | 150193487 | KCNH2 | Promoter   | 0.98 | 6.96E-02  | C | T | 0.77 (0.52 - 1.14) | 1.89 X 10 <sup>-01</sup> | 0.91 (0.66 - 1.26) | 5.74 X 10 <sup>-01</sup> |
| rs2412115  | 11 | 2261717   | KCNQ1 |            | 0.99 | 9.57E-01  | C | T | 0.79 (0.57 - 1.09) | 1.48 X 10 <sup>-01</sup> | 1.17 (0.89 - 1.54) | 2.58 X 10 <sup>-01</sup> |
| rs7104332  | 11 | 2262375   | KCNQ1 |            | 0.99 | 1.25E-02  | A | C | 0.90 (0.63 - 1.27) | 5.34 X 10 <sup>-01</sup> | 0.98 (0.74 - 1.31) | 8.98 X 10 <sup>-01</sup> |
| rs10831706 | 11 | 2262602   | KCNQ1 |            | 0.98 | 1.95E-02  | A | G | 0.78 (0.50 - 1.22) | 2.79 X 10 <sup>-01</sup> | 1.14 (0.76 - 1.70) | 5.24 X 10 <sup>-01</sup> |
| rs7104786  | 11 | 2262744   | KCNQ1 |            | 0.98 | 1.00E+00  | C | T | 0.81 (0.59 - 1.13) | 2.13 X 10 <sup>-01</sup> | 0.93 (0.71 - 1.22) | 5.81 X 10 <sup>-01</sup> |
| rs2521259  | 11 | 2262915   | KCNQ1 |            | 0.98 | 8.46E-01  | C | T | 0.80 (0.58 - 1.10) | 1.73 X 10 <sup>-01</sup> | 1.05 (0.81 - 1.36) | 7.31 X 10 <sup>-01</sup> |
| rs7944004  | 11 | 2267728   | KCNQ1 |            | 0.98 | 8.09E-01  | G | T | 1.18 (0.85 - 1.64) | 3.30 X 10 <sup>-01</sup> | 1.11 (0.86 - 1.44) | 4.16 X 10 <sup>-01</sup> |
| rs7941928  | 11 | 2271980   | KCNQ1 | Promoter   | 0.97 | 2.95E-01  | A | G | 0.87 (0.62 - 1.23) | 4.36 X 10 <sup>-01</sup> | 0.93 (0.71 - 1.23) | 6.32 X 10 <sup>-01</sup> |
| rs2651836  | 11 | 2273296   | KCNQ1 | Promoter   | 0.97 | 6.82E-01  | C | T | 0.87 (0.59 - 1.29) | 5.00 X 10 <sup>-01</sup> | 0.95 (0.69 - 1.30) | 7.35 X 10 <sup>-01</sup> |
| rs2244891  | 11 | 2275931   | KCNQ1 | Promoter   | 0.97 | 9.48E-01  | C | T | 0.87 (0.61 - 1.26) | 4.74 X 10 <sup>-01</sup> | 1.02 (0.75 - 1.38) | 9.26 X 10 <sup>-01</sup> |
| rs2651838  | 11 | 2276107   | KCNQ1 | Promoter   | 0.98 | 3.93E-01  | A | T | 1.26 (0.91 - 1.75) | 1.62 X 10 <sup>-01</sup> | 1.06 (0.81 - 1.38) | 6.93 X 10 <sup>-01</sup> |
| rs2521267  | 11 | 2276509   | KCNQ1 | Promoter   | 0.98 | 4.50E-02  | C | T | 0.93 (0.67 - 1.29) | 6.52 X 10 <sup>-01</sup> | 0.98 (0.75 - 1.29) | 8.92 X 10 <sup>-01</sup> |
| rs16928079 | 11 | 2277134   | KCNQ1 | Promoter   | 0.98 | 9.10E-01  | C | T | 0.69 (0.42 - 1.15) | 1.56 X 10 <sup>-01</sup> | 0.84 (0.55 - 1.29) | 4.24 X 10 <sup>-01</sup> |
| rs2077078  | 11 | 2278712   | KCNQ1 | Promoter   | 0.98 | 9.11E-01  | C | T | 0.73 (0.44 - 1.21) | 2.19 X 10 <sup>-01</sup> | 0.88 (0.58 - 1.33) | 5.35 X 10 <sup>-01</sup> |
| rs11022157 | 11 | 2279405   | KCNQ1 | Promoter   | 0.96 | 2.97E-01  | A | C | 1.21 (0.85 - 1.72) | 3.01 X 10 <sup>-01</sup> | 0.98 (0.74 - 1.29) | 8.62 X 10 <sup>-01</sup> |
| rs2074021  | 11 | 2280104   | KCNQ1 | Intron     | 0.97 | 1.56E-01  | C | T | 1.09 (0.70 - 1.70) | 6.94 X 10 <sup>-01</sup> | 1.41 (0.97 - 2.06) | 7.31 X 10 <sup>-02</sup> |
| rs937614   | 11 | 2283496   | KCNQ1 | Intron     | 0.98 | 7.46E-01  | C | G | 1.01 (0.72 - 1.42) | 9.51 X 10 <sup>-01</sup> | 1.08 (0.82 - 1.43) | 5.94 X 10 <sup>-01</sup> |
| rs4930081  | 11 | 2296398   | KCNQ1 | Downstream | 0.99 | 6.74E-01  | C | T | 1.18 (0.72 - 1.96) | 5.11 X 10 <sup>-01</sup> | 1.54 (1.01 - 2.36) | 4.62 X 10 <sup>-02</sup> |

|            |    |         |       |            |      |           |   |   |                    |                          |                    |                          |
|------------|----|---------|-------|------------|------|-----------|---|---|--------------------|--------------------------|--------------------|--------------------------|
| rs2521283  | 11 | 2298148 | KCNQ1 | Downstream | 0.98 | 1.00E+00  | A | G | 0.97 (0.63 - 1.48) | 8.81 X 10 <sup>-01</sup> | 1.13 (0.80 - 1.61) | 4.94 X 10 <sup>-01</sup> |
| rs2651843  | 11 | 2298308 | KCNQ1 | Downstream | 0.98 | 8.26E-01  | C | T | 1.00 (0.67 - 1.49) | 9.87 X 10 <sup>-01</sup> | 1.16 (0.84 - 1.60) | 3.62 X 10 <sup>-01</sup> |
| rs800123   | 11 | 2320810 | KCNQ1 |            | 0.97 | 8.51E-01  | A | G | 0.90 (0.63 - 1.28) | 5.47 X 10 <sup>-01</sup> | 1.19 (0.88 - 1.60) | 2.69 X 10 <sup>-01</sup> |
| rs808964   | 11 | 2343176 | KCNQ1 |            | 0.97 | 6.19E-01  | A | G | 0.93 (0.65 - 1.35) | 7.10 X 10 <sup>-01</sup> | 1.31 (0.96 - 1.78) | 8.34 X 10 <sup>-02</sup> |
| rs800138   | 11 | 2352867 | KCNQ1 | Promoter   | 0.98 | 6.37E-01  | A | C | 0.87 (0.58 - 1.31) | 5.08 X 10 <sup>-01</sup> | 1.05 (0.74 - 1.48) | 7.91 X 10 <sup>-01</sup> |
| rs731909   | 11 | 2365200 | KCNQ1 | Intron     | 0.98 | 8.48E-01  | C | G | 0.79 (0.51 - 1.23) | 2.97 X 10 <sup>-01</sup> | 0.99 (0.68 - 1.45) | 9.69 X 10 <sup>-01</sup> |
| rs2301696  | 11 | 2383560 | KCNQ1 | Downstream | 0.98 | 1.68E-02  | C | G | 0.85 (0.63 - 1.16) | 3.17 X 10 <sup>-01</sup> | 1.10 (0.85 - 1.41) | 4.65 X 10 <sup>-01</sup> |
| rs2074234  | 11 | 2389540 | KCNQ1 | Exon       | 0.96 | 7.88E-01  | C | T | 1.34 (0.94 - 1.90) | 1.03 X 10 <sup>-01</sup> | 0.92 (0.70 - 1.21) | 5.63 X 10 <sup>-01</sup> |
| rs2301698  | 11 | 2394001 | KCNQ1 | Intron     | 0.96 | 3.78E-01  | G | T | 1.09 (0.79 - 1.51) | 5.90 X 10 <sup>-01</sup> | 0.9 (0.70 - 1.18)  | 4.55 X 10 <sup>-01</sup> |
| rs886277   | 11 | 2396343 | KCNQ1 | Exon       | 0.98 | 4.53E-01  | C | T | 0.91 (0.66 - 1.24) | 5.35 X 10 <sup>-01</sup> | 1.14 (0.87 - 1.48) | 3.42 X 10 <sup>-01</sup> |
| rs2301699  | 11 | 2400670 | KCNQ1 | Intron     | 0.98 | 3.07E-01  | C | G | 1.10 (0.77 - 1.58) | 6.00 X 10 <sup>-01</sup> | 0.73 (0.54 - 0.99) | 4.17 X 10 <sup>-02</sup> |
| rs11821140 | 11 | 2409470 | KCNQ1 | Promoter   | 0.98 | 4.03E-02  | A | G | 1.45 (1.04 - 2.03) | 2.95 X 10 <sup>-02</sup> | 1.10 (0.85 - 1.43) | 4.74 X 10 <sup>-01</sup> |
| rs12277647 | 11 | 2420601 | KCNQ1 | Promoter   | 0.98 | 1.14E-01  | A | C | 1.00 (0.72 - 1.39) | 9.95 X 10 <sup>-01</sup> | 1.22 (0.92 - 1.61) | 1.62 X 10 <sup>-01</sup> |
| rs800396   | 11 | 2429707 | KCNQ1 | Intron     | 0.97 | 6.88E-02  | A | G | 0.90 (0.63 - 1.29) | 5.75 X 10 <sup>-01</sup> | 1.15 (0.85 - 1.54) | 3.64 X 10 <sup>-01</sup> |
| rs11022922 | 11 | 2435771 | KCNQ1 | Intron     | 0.98 | 4.64E-03  | C | T | 1.24 (0.87 - 1.78) | 2.39 X 10 <sup>-01</sup> | 1.60 (1.17 - 2.19) | 3.67 X 10 <sup>-03</sup> |
| rs16928297 | 11 | 2442696 | KCNQ1 | Intron     | 0.98 | 3.94E-02  | G | T | 1.52 (1.05 - 2.21) | 2.78 X 10 <sup>-02</sup> | 1.69 (1.25 - 2.30) | 7.66 X 10 <sup>-04</sup> |
| rs11523905 | 11 | 2454835 | KCNQ1 | Intron     | 0.98 | 3.16E-05  | A | G | 0.86 (0.59 - 1.25) | 4.33 X 10 <sup>-02</sup> | 0.79 (0.59 - 1.07) | 1.35 X 10 <sup>-01</sup> |
| rs757092   | 11 | 2455754 | KCNQ1 | Intron     | 0.98 | 5.15E-01  | A | C | 0.97 (0.69 - 1.35) | 8.39 X 10 <sup>-01</sup> | 1.04 (0.80 - 1.36) | 7.59 X 10 <sup>-01</sup> |
| rs12576239 | 11 | 2458895 | KCNQ1 | Intron     | 0.99 | 7.82E-01  | C | T | 1.38 (0.89 - 2.13) | 1.55 X 10 <sup>-01</sup> | 1.53 (1.08 - 2.16) | 1.69 X 10 <sup>-02</sup> |
| rs2237866  | 11 | 2486738 | KCNQ1 | Intron     | 0.99 | 1.87E-01  | C | T | 0.89 (0.61 - 1.29) | 5.24 X 10 <sup>-01</sup> | 1.07 (0.79 - 1.44) | 6.56 X 10 <sup>-01</sup> |
| rs7952222  | 11 | 2489020 | KCNQ1 | Intron     | 0.98 | 7.15E-13  | A | G | 0.83 (0.54 - 1.28) | 4.07 X 10 <sup>-01</sup> | 0.88 (0.63 - 1.22) | 4.38 X 10 <sup>-01</sup> |
| rs2011750  | 11 | 2491059 | KCNQ1 | Intron     | 0.97 | 6.04E-02  | A | C | 0.95 (0.64 - 1.41) | 8.01 X 10 <sup>-01</sup> | 1.01 (0.73 - 1.41) | 9.49 X 10 <sup>-01</sup> |
| rs10741643 | 11 | 2496298 | KCNQ1 | Intron     | 0.98 | 8.91E-01  | A | G | 0.99 (0.68 - 1.44) | 9.42 X 10 <sup>-01</sup> | 0.94 (0.69 - 1.27) | 6.73 X 10 <sup>-01</sup> |
| rs2283152  | 11 | 2501447 | KCNQ1 | Intron     | 0.98 | 4.89E-01  | C | T | 0.93 (0.67 - 1.31) | 6.89 X 10 <sup>-01</sup> | 0.97 (0.74 - 1.27) | 8.30 X 10 <sup>-01</sup> |
| rs179428   | 11 | 2507085 | KCNQ1 | Intron     | 0.98 | 7.65E-01  | A | G | 1.02 (0.69 - 1.50) | 9.27 X 10 <sup>-01</sup> | 0.96 (0.69 - 1.32) | 7.88 X 10 <sup>-01</sup> |
| rs179430   | 11 | 2507551 | KCNQ1 | Intron     | 0.97 | 7.43E-01  | A | T | 0.94 (0.62 - 1.42) | 7.55 X 10 <sup>-01</sup> | 0.88 (0.62 - 1.24) | 4.72 X 10 <sup>-01</sup> |
| rs179431   | 11 | 2508724 | KCNQ1 | Intron     | 0.98 | 9.04E-01  | A | G | 1.17 (0.81 - 1.70) | 3.96 X 10 <sup>-01</sup> | 1.01 (0.75 - 1.36) | 9.59 X 10 <sup>-01</sup> |
| rs179435   | 11 | 2510279 | KCNQ1 | Intron     | 0.99 | 5.26E-01  | A | G | 1.03 (0.71 - 1.51) | 8.75 X 10 <sup>-01</sup> | 0.98 (0.72 - 1.34) | 9.14 X 10 <sup>-01</sup> |
| rs2074247  | 11 | 2512388 | KCNQ1 | Intron     | 0.96 | 2.38E-01  | A | G | 1.03 (0.75 - 1.40) | 8.72 X 10 <sup>-01</sup> | 1.32 (1.01 - 1.73) | 4.54 X 10 <sup>-02</sup> |
| rs757086   | 11 | 2512831 | KCNQ1 | Intron     | 0.98 | 8.22E-182 | C | T | 1.39 (0.96 - 2.00) | 7.78 X 10 <sup>-02</sup> | 1.59 (1.18 - 2.14) | 2.39 X 10 <sup>-03</sup> |
| rs9299929  | 11 | 2519077 | KCNQ1 | Intron     | 0.98 | 6.96E-01  | C | T | 1.24 (0.91 - 1.68) | 1.67 X 10 <sup>-01</sup> | 1.21 (0.94 - 1.56) | 1.38 X 10 <sup>-01</sup> |
| rs2188198  | 11 | 2525422 | KCNQ1 | Intron     | 0.98 | 8.77E-01  | A | T | 1.50 (1.00 - 2.24) | 5.13 X 10 <sup>-02</sup> | 1.36 (0.98 - 1.88) | 6.38 X 10 <sup>-02</sup> |
| rs9299930  | 11 | 2530272 | KCNQ1 | Intron     | 0.96 | 1.00E+00  | C | T | 1.57 (1.07 - 2.32) | 2.26 X 10 <sup>-02</sup> | 1.15 (0.86 - 1.54) | 3.47 X 10 <sup>-01</sup> |
| rs10430833 | 11 | 2531284 | KCNQ1 | Intron     | 0.98 | 1.33E-01  | A | G | 1.62 (1.02 - 2.57) | 4.23 X 10 <sup>-02</sup> | 1.32 (0.93 - 1.86) | 1.18 X 10 <sup>-01</sup> |
| rs6578273  | 11 | 2544582 | KCNQ1 | Intron     | 0.98 | 9.52E-01  | A | G | 0.93 (0.66 - 1.31) | 6.58 X 10 <sup>-01</sup> | 1.12 (0.84 - 1.49) | 4.34 X 10 <sup>-01</sup> |
| rs10832305 | 11 | 2553901 | KCNQ1 | Intron     | 0.97 | 5.98E-01  | A | G | 0.96 (0.67 - 1.37) | 8.25 X 10 <sup>-01</sup> | 1.11 (0.83 - 1.48) | 4.69 X 10 <sup>-01</sup> |
| rs12282937 | 11 | 2555128 | KCNQ1 | Intron     | 0.98 | 5.20E-01  | A | G | 0.94 (0.68 - 1.30) | 7.09 X 10 <sup>-01</sup> | 1.06 (0.82 - 1.37) | 6.64 X 10 <sup>-01</sup> |
| rs4930128  | 11 | 2555366 | KCNQ1 | Intron     | 0.98 | 2.14E-01  | C | T | 0.90 (0.62 - 1.31) | 5.91 X 10 <sup>-01</sup> | 1.10 (0.80 - 1.49) | 5.64 X 10 <sup>-01</sup> |
| rs2283172  | 11 | 2557061 | KCNQ1 | Intron     | 0.98 | 9.61E-04  | A | G | 1.05 (0.72 - 1.54) | 7.99 X 10 <sup>-01</sup> | 0.98 (0.71 - 1.35) | 8.97 X 10 <sup>-01</sup> |
| rs17674607 | 11 | 2562581 | KCNQ1 | Intron     | 0.97 | 2.93E-01  | C | G | 1.23 (0.87 - 1.75) | 2.46 X 10 <sup>-01</sup> | 1.23 (0.94 - 1.62) | 1.34 X 10 <sup>-01</sup> |
| rs2157760  | 11 | 2572176 | KCNQ1 | Intron     | 0.98 | 1.27E-02  | A | G | 1.14 (0.73 - 1.77) | 5.68 X 10 <sup>-01</sup> | 1.11 (0.77 - 1.60) | 5.91 X 10 <sup>-01</sup> |
| rs4930139  | 11 | 2587879 | KCNQ1 | Intron     | 0.96 | 9.38E-01  | A | G | 1.17 (0.78 - 1.77) | 4.49 X 10 <sup>-01</sup> | 0.93 (0.67 - 1.29) | 6.63 X 10 <sup>-01</sup> |
| rs10766212 | 11 | 2589728 | KCNQ1 | Intron     | 0.99 | 7.29E-01  | A | G | 1.18 (0.85 - 1.64) | 3.16 X 10 <sup>-01</sup> | 1.17 (0.89 - 1.53) | 2.56 X 10 <sup>-01</sup> |
| rs760419   | 11 | 2639933 | KCNQ1 | Intron     | 0.98 | 7.89E-02  | A | G | 0.87 (0.62 - 1.21) | 4.13 X 10 <sup>-01</sup> | 1.22 (0.93 - 1.59) | 1.53 X 10 <sup>-01</sup> |
| rs9666537  | 11 | 2642440 | KCNQ1 | Intron     | 0.94 | 8.10E-01  | C | T | 0.84 (0.60 - 1.19) | 3.34 X 10 <sup>-01</sup> | 0.94 (0.70 - 1.26) | 6.85 X 10 <sup>-01</sup> |
| rs10832514 | 11 | 2645102 | KCNQ1 | Intron     | 0.98 | 7.78E-01  | A | G | 1.15 (0.81 - 1.62) | 4.37 X 10 <sup>-01</sup> | 1.21 (0.92 - 1.60) | 1.78 X 10 <sup>-01</sup> |
| rs12418076 | 11 | 2645676 | KCNQ1 | Intron     | 0.96 | 7.59E-01  | C | T | 1.53 (0.85 - 2.75) | 1.59 X 10 <sup>-01</sup> | 1.40 (0.91 - 2.15) | 1.23 X 10 <sup>-01</sup> |
| rs4930005  | 11 | 2647107 | KCNQ1 | Intron     | 0.97 | 7.88E-01  | C | T | 1.10 (0.75 - 1.60) | 6.20 X 10 <sup>-01</sup> | 1.03 (0.76 - 1.39) | 8.68 X 10 <sup>-01</sup> |
| rs231362   | 11 | 2648047 | KCNQ1 | Intron     | 0.96 | 6.59E-01  | C | T | 0.85 (0.61 - 1.17) | 3.14 X 10 <sup>-01</sup> | 0.89 (0.69 - 1.14) | 3.47 X 10 <sup>-01</sup> |
| rs231361   | 11 | 2648076 | KCNQ1 | Intron     | 0.99 | 2.76E-01  | C | T | 1.15 (0.80 - 1.64) | 4.47 X 10 <sup>-01</sup> | 1.25 (0.92 - 1.68) | 1.49 X 10 <sup>-01</sup> |
| rs7128926  | 11 | 2653320 | KCNQ1 | Intron     | 0.99 | 2.63E-02  | A | G | 1.47 (0.99 - 2.19) | 5.78 X 10 <sup>-02</sup> | 1.10 (0.81 - 1.49) | 5.50 X 10 <sup>-01</sup> |
| rs231357   | 11 | 2661751 | KCNQ1 | Intron     | 0.98 | 6.98E-01  | A | G | 0.71 (0.51 - 0.99) | 4.36 X 10 <sup>-02</sup> | 0.83 (0.64 - 1.08) | 1.69 X 10 <sup>-01</sup> |
| rs231356   | 11 | 2661919 | KCNQ1 | Intron     | 0.99 | 1.00E+00  | A | T | 1.15 (0.81 - 1.63) | 4.22 X 10 <sup>-01</sup> | 1.16 (0.87 - 1.54) | 3.11 X 10 <sup>-01</sup> |
| rs7939976  | 11 | 2668862 | KCNQ1 | Intron     | 0.99 | 1.00E+00  | A | G | 1.00 (0.66 - 1.51) | 9.84 X 10 <sup>-01</sup> | 0.96 (0.69 - 1.34) | 8.22 X 10 <sup>-01</sup> |
| rs231841   | 11 | 2680180 | KCNQ1 | Intron     | 0.98 | 9.58E-01  | A | C | 1.49 (1.06 - 2.09) | 2.05 X 10 <sup>-02</sup> | 1.41 (1.07 - 1.86) | 1.41 X 10 <sup>-02</sup> |
| rs4930149  | 11 | 2692602 | KCNQ1 | Intron     | 0.98 | 1.31E-01  | A | C | 1.14 (0.68 - 1.91) | 6.28 X 10 <sup>-01</sup> | 1.05 (0.68 - 1.63) | 8.23 X 10 <sup>-01</sup> |
| rs2283202  | 11 | 2694481 | KCNQ1 | Intron     | 0.96 | 8.81E-01  | A | G | 1.31 (0.94 - 1.82) | 1.12 X 10 <sup>-01</sup> | 1.25 (0.96 - 1.62) | 1.03 X 10 <sup>-01</sup> |
| rs2283205  | 11 | 2697903 | KCNQ1 | Intron     | 0.99 | 2.25E-01  | C | T | 1.10 (0.72 - 1.67) | 6.72 X 10 <sup>-01</sup> | 1.02 (0.74 - 1.41) | 9.12 X 10 <sup>-01</sup> |
| rs2283208  | 11 | 2700435 | KCNQ1 | Intron     | 0.97 | 1.00E+00  | A | G | 1.33 (0.97 - 1.82) | 7.60 X 10 <sup>-02</sup> | 0.90 (0.70 - 1.16) | 4.20 X 10 <sup>-01</sup> |
| rs231917   | 11 | 2701683 | KCNQ1 | Intron     | 0.98 | 5.05E-01  | A | G | 0.97 (0.70 - 1.35) | 8.76 X 10 <sup>-01</sup> | 0.94 (0.71 - 1.25) | 6.66 X 10 <sup>-01</sup> |
| rs231916   | 11 | 2704944 | KCNQ1 | Intron     | 0.99 | 1.22E-04  | A | G | 0.74 (0.51 - 1.09) | 1.32 X 10 <sup>-01</sup> | 1.14 (0.83 - 1.58) | 4.20 X 10 <sup>-01</sup> |
| rs231914   | 11 | 2705952 | KCNQ1 | Intron     | 0.99 | 6.45E-01  | A | G | 0.83 (0.60 - 1.16) | 2.85 X 10 <sup>-01</sup> | 1.05 (0.81 - 1.36) | 7.38 X 10 <sup>-01</sup> |
| rs422316   | 11 | 2711910 | KCNQ1 | Intron     | 0.98 | 3.57E-01  | C | T | 0.78 (0.57 - 1.07) | 1.25 X 10 <sup>-01</sup> | 0.99 (0.77 - 1.28) | 9.40 X 10 <sup>-01</sup> |
| rs2283222  | 11 | 2712177 | KCNQ1 | Intron     | 0.99 | 5.33E-01  | C | T | 0.93 (0.65 - 1.34) | 7.08 X 10 <sup>-01</sup> | 0.82 (0.62 - 1.10) | 1.85 X 10 <sup>-01</sup> |

|            |    |           |       |            |      |          |   |   |                    |                          |                    |                          |
|------------|----|-----------|-------|------------|------|----------|---|---|--------------------|--------------------------|--------------------|--------------------------|
| rs108961   | 11 | 2714561   | KCNQ1 | Intron     | 0.98 | 7.69E-01 | A | G | 1.00 (0.73 - 1.36) | 9.89 X 10 <sup>-01</sup> | 0.97 (0.75 - 1.26) | 8.43 X 10 <sup>-01</sup> |
| rs231880   | 11 | 2715666   | KCNQ1 | Intron     | 0.97 | 7.08E-01 | C | T | 1.21 (0.88 - 1.65) | 2.45 X 10 <sup>-01</sup> | 1.07 (0.82 - 1.40) | 6.24 X 10 <sup>-01</sup> |
| rs7114479  | 11 | 2719804   | KCNQ1 | Intron     | 0.98 | 3.91E-01 | C | T | 1.30 (0.93 - 1.81) | 1.21 X 10 <sup>-01</sup> | 1.09 (0.83 - 1.43) | 5.35 X 10 <sup>-01</sup> |
| rs2237876  | 11 | 2721878   | KCNQ1 | Intron     | 0.99 | 1.00E+00 | C | T | 0.85 (0.58 - 1.22) | 3.71 X 10 <sup>-01</sup> | 0.89 (0.65 - 1.22) | 4.68 X 10 <sup>-01</sup> |
| rs2237878  | 11 | 2722858   | KCNQ1 | Intron     | 0.99 | 7.03E-01 | A | G | 1.06 (0.64 - 1.75) | 8.21 X 10 <sup>-01</sup> | 1.01 (0.68 - 1.52) | 9.49 X 10 <sup>-01</sup> |
| rs231899   | 11 | 2724543   | KCNQ1 | Intron     | 0.98 | 1.00E+00 | C | T | 1.03 (0.72 - 1.48) | 8.60 X 10 <sup>-01</sup> | 1.04 (0.78 - 1.40) | 7.84 X 10 <sup>-01</sup> |
| rs2056892  | 11 | 2730047   | KCNQ1 | Intron     | 0.99 | 9.80E-02 | A | C | 1.40 (1.02 - 1.92) | 3.86 X 10 <sup>-02</sup> | 1.19 (0.92 - 1.53) | 1.80 X 10 <sup>-01</sup> |
| rs231889   | 11 | 2733768   | KCNQ1 | Intron     | 0.98 | 7.08E-01 | C | T | 0.97 (0.63 - 1.51) | 9.05 X 10 <sup>-01</sup> | 1.02 (0.71 - 1.46) | 9.35 X 10 <sup>-01</sup> |
| rs11023999 | 11 | 2734699   | KCNQ1 | Intron     | 0.98 | 1.48E-01 | A | G | 1.41 (1.01 - 1.96) | 4.52 X 10 <sup>-02</sup> | 1.27 (0.96 - 1.66) | 9.00 X 10 <sup>-02</sup> |
| rs463535   | 11 | 2738246   | KCNQ1 | Intron     | 0.98 | 9.30E-01 | A | G | 1.02 (0.66 - 1.57) | 9.33 X 10 <sup>-01</sup> | 1.05 (0.74 - 1.48) | 7.83 X 10 <sup>-01</sup> |
| rs11024017 | 11 | 2741721   | KCNQ1 | Intron     | 0.97 | 3.68E-02 | A | G | 1.56 (1.03 - 2.38) | 3.73 X 10 <sup>-02</sup> | 1.20 (0.87 - 1.65) | 2.66 X 10 <sup>-01</sup> |
| rs151288   | 11 | 2742878   | KCNQ1 | Intron     | 0.99 | 4.25E-01 | A | G | 0.92 (0.63 - 1.33) | 6.39 X 10 <sup>-01</sup> | 0.92 (0.68 - 1.24) | 5.93 X 10 <sup>-01</sup> |
| rs231872   | 11 | 2743637   | KCNQ1 | Intron     | 0.98 | 4.99E-01 | A | C | 1.31 (0.94 - 1.82) | 1.10 X 10 <sup>-01</sup> | 1.17 (0.90 - 1.53) | 2.46 X 10 <sup>-01</sup> |
| rs11024034 | 11 | 2746739   | KCNQ1 | Intron     | 0.96 | 8.15E-01 | C | T | 0.88 (0.52 - 1.49) | 6.40 X 10 <sup>-01</sup> | 1.01 (0.67 - 1.53) | 9.74 X 10 <sup>-01</sup> |
| rs2237882  | 11 | 2747784   | KCNQ1 | Intron     | 0.97 | 6.23E-01 | A | G | 0.98 (0.67 - 1.45) | 9.36 X 10 <sup>-01</sup> | 0.88 (0.64 - 1.20) | 4.13 X 10 <sup>-01</sup> |
| rs1057128  | 11 | 2753813   | KCNQ1 | Exon       | 0.99 | 1.28E-01 | A | G | 0.70 (0.47 - 1.05) | 8.58 X 10 <sup>-02</sup> | 0.72 (0.51 - 1.04) | 7.69 X 10 <sup>-02</sup> |
| rs234886   | 11 | 2758666   | KCNQ1 | Intron     | 0.99 | 6.54E-03 | C | G | 0.69 (0.42 - 1.13) | 1.42 X 10 <sup>-01</sup> | 0.93 (0.60 - 1.45) | 7.52 X 10 <sup>-01</sup> |
| rs2074200  | 11 | 2773277   | KCNQ1 | Intron     | 0.98 | 7.33E-02 | C | G | 1.23 (0.85 - 1.77) | 2.77 X 10 <sup>-01</sup> | 1.05 (0.78 - 1.41) | 7.60 X 10 <sup>-01</sup> |
| rs151316   | 11 | 2776196   | KCNQ1 | Intron     | 0.98 | 8.79E-01 | A | G | 0.83 (0.57 - 1.22) | 3.52 X 10 <sup>-01</sup> | 1.25 (0.91 - 1.73) | 1.74 X 10 <sup>-01</sup> |
| rs163171   | 11 | 2777641   | KCNQ1 | Intron     | 0.97 | 8.32E-01 | C | T | 1.11 (0.75 - 1.64) | 6.10 X 10 <sup>-01</sup> | 1.12 (0.82 - 1.52) | 4.92 X 10 <sup>-01</sup> |
| rs163177   | 11 | 2794989   | KCNQ1 | Intron     | 0.98 | 9.23E-01 | C | T | 0.84 (0.61 - 1.16) | 3.00 X 10 <sup>-01</sup> | 0.93 (0.72 - 1.20) | 5.61 X 10 <sup>-01</sup> |
| rs233450   | 11 | 2800624   | KCNQ1 | Intron     | 0.98 | 3.19E-02 | A | G | 1.40 (1.00 - 1.96) | 4.88 X 10 <sup>-02</sup> | 1.13 (0.86 - 1.48) | 3.77 X 10 <sup>-01</sup> |
| rs163182   | 11 | 2800792   | KCNQ1 | Intron     | 0.98 | 4.34E-01 | C | G | 0.86 (0.63 - 1.19) | 3.65 X 10 <sup>-01</sup> | 0.94 (0.73 - 1.22) | 6.57 X 10 <sup>-01</sup> |
| rs163184   | 11 | 2803645   | KCNQ1 | Intron     | 0.98 | 3.30E-01 | G | T | 0.92 (0.67 - 1.26) | 6.05 X 10 <sup>-01</sup> | 0.96 (0.75 - 1.25) | 7.82 X 10 <sup>-01</sup> |
| rs3854430  | 11 | 2807019   | KCNQ1 | Intron     | 0.99 | 7.51E-01 | A | G | 1.09 (0.71 - 1.67) | 6.90 X 10 <sup>-01</sup> | 0.95 (0.68 - 1.33) | 7.65 X 10 <sup>-01</sup> |
| rs234854   | 11 | 2807546   | KCNQ1 | Intron     | 0.98 | 7.53E-01 | A | G | 0.81 (0.55 - 1.20) | 2.92 X 10 <sup>-01</sup> | 0.98 (0.72 - 1.33) | 9.04 X 10 <sup>-01</sup> |
| rs468153   | 11 | 2815797   | KCNQ1 | Intron     | 0.98 | 4.01E-01 | C | G | 0.96 (0.68 - 1.36) | 8.33 X 10 <sup>-01</sup> | 0.98 (0.74 - 1.30) | 8.95 X 10 <sup>-01</sup> |
| rs10741726 | 11 | 2818154   | KCNQ1 | Intron     | 0.98 | 4.05E-01 | G | T | 1.55 (1.12 - 2.15) | 7.91 X 10 <sup>-03</sup> | 1.18 (0.90 - 1.55) | 2.22 X 10 <sup>-01</sup> |
| rs4930013  | 11 | 2818735   | KCNQ1 | Intron     | 0.98 | 3.07E-02 | A | C | 0.76 (0.53 - 1.08) | 1.25 X 10 <sup>-01</sup> | 0.76 (0.57 - 1.02) | 7.13 X 10 <sup>-02</sup> |
| rs2005833  | 11 | 2819863   | KCNQ1 | Intron     | 0.98 | 3.92E-01 | A | G | 0.93 (0.66 - 1.30) | 6.65 X 10 <sup>-01</sup> | 1.42 (1.07 - 1.89) | 1.70 X 10 <sup>-02</sup> |
| rs2237898  | 11 | 2820396   | KCNQ1 | Intron     | 0.97 | 2.11E-01 | A | C | 1.59 (0.88 - 2.85) | 1.21 X 10 <sup>-01</sup> | 1.84 (1.19 - 2.86) | 6.27 X 10 <sup>-03</sup> |
| rs2237899  | 11 | 2822824   | KCNQ1 | Intron     | 0.98 | 3.68E-01 | C | T | 0.68 (0.45 - 1.03) | 6.71 X 10 <sup>-02</sup> | 0.97 (0.68 - 1.37) | 8.55 X 10 <sup>-01</sup> |
| rs8234     | 11 | 2826684   | KCNQ1 | 3'UTR      | 0.98 | 6.77E-02 | A | G | 0.74 (0.53 - 1.04) | 8.08 X 10 <sup>-02</sup> | 1.09 (0.83 - 1.43) | 5.28 X 10 <sup>-01</sup> |
| rs7108037  | 11 | 2831739   | KCNQ1 | Downstream | 0.98 | 5.60E-01 | A | G | 0.80 (0.58 - 1.10) | 1.65 X 10 <sup>-01</sup> | 0.97 (0.75 - 1.27) | 8.41 X 10 <sup>-01</sup> |
| rs10766424 | 11 | 2842304   | KCNQ1 | Promoter   | 0.98 | 8.41E-01 | C | T | 1.35 (0.98 - 1.88) | 6.78 X 10 <sup>-02</sup> | 1.30 (1.00 - 1.70) | 5.11 X 10 <sup>-02</sup> |
| rs4930020  | 11 | 2848813   | KCNQ1 | Intron     | 0.95 | 4.16E-02 | A | G | 0.86 (0.60 - 1.24) | 4.15 X 10 <sup>-01</sup> | 0.81 (0.60 - 1.10) | 1.73 X 10 <sup>-01</sup> |
| rs10488671 | 11 | 2853359   | KCNQ1 | Downstream | 0.98 | 3.74E-03 | G | T | 0.95 (0.56 - 1.62) | 8.46 X 10 <sup>-01</sup> | 0.97 (0.61 - 1.54) | 8.92 X 10 <sup>-01</sup> |
| rs10766441 | 11 | 2853602   | KCNQ1 | Downstream | 0.99 | 3.43E-02 | A | C | 1.11 (0.79 - 1.54) | 5.56 X 10 <sup>-01</sup> | 1.07 (0.82 - 1.40) | 6.08 X 10 <sup>-01</sup> |
| rs16924912 | 11 | 2853701   | KCNQ1 | Downstream | 0.98 | 6.12E-01 | A | T | 0.79 (0.44 - 1.42) | 4.25 X 10 <sup>-01</sup> | 0.94 (0.57 - 1.54) | 8.05 X 10 <sup>-01</sup> |
| rs16928791 | 11 | 2856600   | KCNQ1 | Downstream | 0.99 | 5.91E-02 | A | G | 0.72 (0.46 - 1.13) | 1.56 X 10 <sup>-01</sup> | 1.16 (0.80 - 1.69) | 4.38 X 10 <sup>-01</sup> |
| rs4929954  | 11 | 2856959   | KCNQ1 | Downstream | 0.97 | 2.00E-02 | C | G | 1.25 (0.90 - 1.72) | 1.84 X 10 <sup>-01</sup> | 0.89 (0.68 - 1.15) | 3.58 X 10 <sup>-01</sup> |
| rs4930026  | 11 | 2856994   | KCNQ1 | Downstream | 0.99 | 6.00E-02 | C | T | 0.75 (0.52 - 1.10) | 1.39 X 10 <sup>-01</sup> | 1.08 (0.79 - 1.46) | 6.31 X 10 <sup>-01</sup> |
| rs400643   | 11 | 2869522   | KCNQ1 | Intron     | 0.98 | 8.00E-01 | G | T | 0.65 (0.46 - 0.92) | 1.59 X 10 <sup>-02</sup> | 0.89 (0.68 - 1.17) | 4.00 X 10 <sup>-01</sup> |
| rs2283231  | 11 | 2873291   | KCNQ1 | Intron     | 0.98 | 5.82E-01 | A | T | 0.74 (0.47 - 1.16) | 1.86 X 10 <sup>-01</sup> | 0.92 (0.64 - 1.33) | 6.67 X 10 <sup>-01</sup> |
| rs2283232  | 11 | 2875709   | KCNQ1 | Intron     | 0.97 | 8.38E-03 | C | T | 1.10 (0.79 - 1.54) | 5.64 X 10 <sup>-01</sup> | 0.98 (0.75 - 1.28) | 8.83 X 10 <sup>-01</sup> |
| rs365605   | 11 | 2877242   | KCNQ1 | Exon       | 0.98 | 5.51E-01 | C | T | 1.13 (0.79 - 1.60) | 5.05 X 10 <sup>-01</sup> | 1.03 (0.78 - 1.36) | 8.26 X 10 <sup>-01</sup> |
| rs367035   | 11 | 2880402   | KCNQ1 | 3'UTR      | 0.98 | 4.33E-01 | A | G | 0.90 (0.64 - 1.26) | 5.32 X 10 <sup>-01</sup> | 0.83 (0.63 - 1.09) | 1.76 X 10 <sup>-01</sup> |
| rs389646   | 11 | 2882337   | KCNQ1 | Intron     | 0.99 | 9.87E-02 | A | G | 1.36 (0.88 - 2.11) | 1.66 X 10 <sup>-01</sup> | 1.36 (0.95 - 1.94) | 9.40 X 10 <sup>-02</sup> |
| rs7934945  | 11 | 2889520   | KCNQ1 | Intron     | 0.97 | 6.86E-01 | C | G | 1.16 (0.81 - 1.65) | 4.14 X 10 <sup>-01</sup> | 1.05 (0.79 - 1.40) | 7.24 X 10 <sup>-01</sup> |
| rs3782067  | 11 | 2891879   | KCNQ1 | Intron     | 0.99 | 7.41E-01 | A | G | 1.01 (0.73 - 1.41) | 9.43 X 10 <sup>-01</sup> | 0.98 (0.74 - 1.29) | 8.64 X 10 <sup>-01</sup> |
| rs11024558 | 11 | 2892942   | KCNQ1 | Intron     | 0.97 | 5.86E-01 | G | T | 1.01 (0.73 - 1.39) | 9.48 X 10 <sup>-01</sup> | 0.94 (0.72 - 1.23) | 6.57 X 10 <sup>-01</sup> |
| rs443193   | 11 | 2893422   | KCNQ1 | Intron     | 0.97 | 1.29E-01 | C | T | 1.03 (0.75 - 1.42) | 8.62 X 10 <sup>-01</sup> | 0.99 (0.76 - 1.29) | 9.27 X 10 <sup>-01</sup> |
| rs427398   | 11 | 2895626   | KCNQ1 | Intron     | 0.99 | 4.59E-05 | C | T | 1.08 (0.79 - 1.45) | 6.40 X 10 <sup>-01</sup> | 1.22 (0.95 - 1.58) | 1.23 X 10 <sup>-01</sup> |
| rs10892201 | 11 | 117353502 | SCN4B | Promoter   | 0.99 | 6.13E-01 | C | T | 1.36 (0.82 - 2.27) | 2.38 X 10 <sup>-01</sup> | 1.19 (0.81 - 1.75) | 3.74 X 10 <sup>-01</sup> |
| rs4936414  | 11 | 117358823 | SCN4B | Promoter   | 0.97 | 6.84E-02 | C | T | 1.23 (0.87 - 1.73) | 2.34 X 10 <sup>-01</sup> | 1.25 (0.96 - 1.63) | 9.76 X 10 <sup>-02</sup> |
| rs2508450  | 11 | 117369039 | SCN4B | Intron     | 0.99 | 7.77E-02 | C | T | 1.07 (0.77 - 1.47) | 6.93 X 10 <sup>-01</sup> | 1.11 (0.86 - 1.43) | 4.43 X 10 <sup>-01</sup> |
| rs9610     | 11 | 117377296 | SCN4B | 3'UTR      | 0.98 | 1.30E-01 | A | G | 0.85 (0.62 - 1.15) | 2.90 X 10 <sup>-01</sup> | 0.97 (0.75 - 1.25) | 8.22 X 10 <sup>-01</sup> |
| rs2508445  | 11 | 117377754 | SCN4B | Downstream | 0.99 | 5.98E-02 | G | T | 1.21 (0.86 - 1.70) | 2.64 X 10 <sup>-01</sup> | 1.18 (0.91 - 1.54) | 2.17 X 10 <sup>-01</sup> |
| rs947890   | 11 | 117379703 | SCN4B | Downstream | 0.99 | 2.47E-01 | C | T | 0.96 (0.60 - 1.54) | 8.62 X 10 <sup>-01</sup> | 0.81 (0.54 - 1.20) | 2.95 X 10 <sup>-01</sup> |
| rs11216666 | 11 | 117381245 | SCN4B | Downstream | 0.97 | 5.83E-02 | C | T | 1.11 (0.73 - 1.67) | 6.30 X 10 <sup>-01</sup> | 1.12 (0.81 - 1.56) | 4.89 X 10 <sup>-01</sup> |
| rs2512153  | 11 | 117394434 | SCN4B |            | 0.95 | 4.40E-02 | A | G | 1.03 (0.74 - 1.44) | 8.56 X 10 <sup>-01</sup> | 0.94 (0.71 - 1.24) | 6.50 X 10 <sup>-01</sup> |
| rs617357   | 11 | 117405013 | SCN4B |            | 0.98 | 2.49E-01 | A | T | 0.91 (0.64 - 1.32) | 6.32 X 10 <sup>-01</sup> | 0.92 (0.68 - 1.25) | 5.97 X 10 <sup>-01</sup> |
| rs586304   | 11 | 117407379 | SCN4B |            | 0.98 | 8.84E-01 | C | T | 0.92 (0.67 - 1.25) | 5.81 X 10 <sup>-01</sup> | 0.88 (0.68 - 1.14) | 3.16 X 10 <sup>-01</sup> |
| rs4936417  | 11 | 117409046 | SCN4B |            | 0.98 | 9.55E-01 | C | T | 0.85 (0.61 - 1.19) | 3.43 X 10 <sup>-01</sup> | 0.94 (0.71 - 1.24) | 6.50 X 10 <sup>-01</sup> |



|            |    |           |         |            |      |          |   |   |                    |                          |                    |                          |
|------------|----|-----------|---------|------------|------|----------|---|---|--------------------|--------------------------|--------------------|--------------------------|
| rs4936418  | 11 | 117409259 | SCN4B   |            | 0.96 | 5.60E-01 | A | T | 0.98 (0.68 - 1.40) | 8.96 X 10 <sup>-01</sup> | 0.88 (0.66 - 1.18) | 3.91 X 10 <sup>-01</sup> |
| rs1783850  | 11 | 117409771 | SCN4B   |            | 0.97 | 4.84E-02 | C | G | 1.24 (0.80 - 1.90) | 3.35 X 10 <sup>-01</sup> | 1.01 (0.73 - 1.41) | 9.42 X 10 <sup>-01</sup> |
| rs1786176  | 11 | 117410845 | SCN4B   |            | 0.98 | 2.36E-01 | C | T | 1.53 (0.90 - 2.57) | 1.13 X 10 <sup>-01</sup> | 1.82 (1.22 - 2.72) | 3.57 X 10 <sup>-03</sup> |
| rs597820   | 11 | 117416577 | SCN4B   |            | 0.97 | 7.32E-01 | G | T | 1.07 (0.78 - 1.47) | 6.82 X 10 <sup>-01</sup> | 0.89 (0.69 - 1.16) | 3.95 X 10 <sup>-01</sup> |
| rs659092   | 11 | 117423172 | SCN4B   |            | 0.97 | 1.00E+00 | C | T | 1.28 (0.79 - 2.07) | 3.23 X 10 <sup>-01</sup> | 1.45 (0.99 - 2.11) | 5.77 X 10 <sup>-02</sup> |
| rs7938067  | 11 | 117429488 | SCN4B   |            | 0.99 | 1.31E-01 | C | T | 1.27 (0.90 - 1.78) | 1.68 X 10 <sup>-01</sup> | 1.21 (0.92 - 1.58) | 1.76 X 10 <sup>-01</sup> |
| rs584356   | 11 | 117435638 | SCN4B   |            | 0.99 | 5.94E-01 | A | G | 1.58 (0.97 - 2.57) | 6.49 X 10 <sup>-02</sup> | 1.59 (1.10 - 2.31) | 1.42 X 10 <sup>-02</sup> |
| rs620924   | 11 | 117452908 | SCN4B   | Promoter   | 0.98 | 1.00E+00 | A | G | 1.09 (0.75 - 1.58) | 6.60 X 10 <sup>-01</sup> | 1.00 (0.74 - 1.34) | 9.76 X 10 <sup>-01</sup> |
| rs3825050  | 11 | 117457307 | SCN4B   | Intron     | 0.97 | 3.06E-05 | C | T | 0.81 (0.59 - 1.11) | 1.79 X 10 <sup>-01</sup> | 0.82 (0.63 - 1.06) | 1.33 X 10 <sup>-01</sup> |
| rs7937420  | 11 | 117458898 | SCN4B   | Intron     | 0.97 | 7.27E-01 | A | G | 0.84 (0.61 - 1.18) | 3.19 X 10 <sup>-01</sup> | 0.99 (0.75 - 1.31) | 9.28 X 10 <sup>-01</sup> |
| rs657118   | 11 | 117459291 | SCN4B   | Intron     | 0.97 | 6.25E-01 | C | T | 0.98 (0.72 - 1.34) | 9.16 X 10 <sup>-01</sup> | 1.01 (0.78 - 1.31) | 9.37 X 10 <sup>-01</sup> |
| rs10160375 | 11 | 117459460 | SCN4B   | Intron     | 0.98 | 9.18E-01 | C | T | 0.79 (0.57 - 1.10) | 1.62 X 10 <sup>-01</sup> | 0.74 (0.57 - 0.98) | 3.44 X 10 <sup>-02</sup> |
| rs10892210 | 11 | 117461548 | SCN4B   | Intron     | 0.99 | 6.80E-01 | G | T | 0.86 (0.61 - 1.20) | 3.67 X 10 <sup>-01</sup> | 0.71 (0.54 - 0.93) | 1.37 X 10 <sup>-02</sup> |
| rs689264   | 11 | 117462468 | SCN4B   | Intron     | 0.98 | 2.95E-01 | C | T | 1.68 (0.96 - 2.92) | 6.93 X 10 <sup>-02</sup> | 2.38 (1.53 - 3.70) | 1.15 X 10 <sup>-04</sup> |
| rs1317876  | 11 | 117464119 | SCN4B   | Intron     | 0.98 | 4.92E-01 | C | T | 1.04 (0.75 - 1.43) | 8.11 X 10 <sup>-01</sup> | 0.97 (0.74 - 1.25) | 7.91 X 10 <sup>-01</sup> |
| rs948461   | 11 | 117465348 | SCN4B   | Intron     | 0.98 | 1.32E-01 | G | T | 0.86 (0.62 - 1.20) | 3.70 X 10 <sup>-01</sup> | 0.95 (0.72 - 1.25) | 7.05 X 10 <sup>-01</sup> |
| rs1893317  | 11 | 117465637 | SCN4B   | Intron     | 0.98 | 1.15E-01 | A | G | 1.24 (0.88 - 1.74) | 2.16 X 10 <sup>-01</sup> | 1.34 (1.01 - 1.77) | 3.99 X 10 <sup>-02</sup> |
| rs2276122  | 11 | 117470740 | SCN4B   | Intron     | 0.98 | 5.96E-02 | A | G | 0.88 (0.64 - 1.22) | 4.48 X 10 <sup>-01</sup> | 1.01 (0.78 - 1.31) | 9.29 X 10 <sup>-01</sup> |
| rs948462   | 11 | 117474373 | SCN4B   | Intron     | 0.97 | 2.64E-01 | A | G | 0.97 (0.66 - 1.43) | 8.92 X 10 <sup>-01</sup> | 0.93 (0.69 - 1.27) | 6.66 X 10 <sup>-01</sup> |
| rs6589646  | 11 | 117483159 | SCN4B   | Intron     | 0.97 | 2.31E-02 | C | T | 0.98 (0.72 - 1.33) | 8.89 X 10 <sup>-01</sup> | 1.25 (0.97 - 1.62) | 8.48 X 10 <sup>-02</sup> |
| rs596134   | 11 | 117489833 | SCN4B   | Intron     | 0.98 | 7.18E-02 | C | T | 1.00 (0.73 - 1.37) | 9.89 X 10 <sup>-01</sup> | 1.13 (0.87 - 1.47) | 3.55 X 10 <sup>-01</sup> |
| rs3741311  | 11 | 117494764 | SCN4B   | Downstream | 0.98 | 2.28E-01 | A | G | 1.13 (0.82 - 1.56) | 4.65 X 10 <sup>-01</sup> | 1.01 (0.78 - 1.31) | 9.26 X 10 <sup>-01</sup> |
| rs10790239 | 11 | 117506655 | SCN4B   | Downstream | 0.99 | 1.02E-01 | C | T | 1.10 (0.75 - 1.62) | 6.10 X 10 <sup>-01</sup> | 1.04 (0.76 - 1.42) | 8.09 X 10 <sup>-01</sup> |
| rs868344   | 11 | 117510329 | SCN4B   | 3'UTR      | 0.98 | 4.45E-01 | C | T | 0.98 (0.70 - 1.37) | 9.16 X 10 <sup>-01</sup> | 1.01 (0.77 - 1.31) | 9.68 X 10 <sup>-01</sup> |
| rs640323   | 11 | 117516100 | SCN4B   | Intron     | 0.98 | 5.45E-01 | C | G | 0.97 (0.70 - 1.34) | 8.48 X 10 <sup>-01</sup> | 0.96 (0.74 - 1.24) | 7.43 X 10 <sup>-01</sup> |
| rs644287   | 11 | 117517015 | SCN4B   | Intron     | 0.95 | 1.07E-15 | C | T | 0.97 (0.70 - 1.35) | 8.71 X 10 <sup>-01</sup> | 0.96 (0.74 - 1.24) | 7.39 X 10 <sup>-01</sup> |
| rs12804550 | 11 | 117517070 | SCN4B   | Intron     | 0.99 | 8.26E-02 | A | G | 1.00 (0.68 - 1.48) | 9.88 X 10 <sup>-01</sup> | 0.96 (0.70 - 1.32) | 8.20 X 10 <sup>-01</sup> |
| rs11216781 | 11 | 117517520 | SCN4B   | Intron     | 0.99 | 2.37E-01 | A | G | 1.00 (0.71 - 1.40) | 9.90 X 10 <sup>-01</sup> | 1.19 (0.90 - 1.56) | 2.27 X 10 <sup>-01</sup> |
| rs11604096 | 11 | 117517651 | SCN4B   | Intron     | 0.96 | 3.41E-01 | A | C | 1.09 (0.78 - 1.52) | 6.21 X 10 <sup>-01</sup> | 1.02 (0.78 - 1.32) | 8.86 X 10 <sup>-01</sup> |
| rs955917   | 11 | 117521249 | SCN4B   | Intron     | 0.99 | 2.31E-03 | A | G | 0.96 (0.64 - 1.44) | 8.38 X 10 <sup>-01</sup> | 0.96 (0.69 - 1.34) | 8.21 X 10 <sup>-01</sup> |
| rs658624   | 11 | 117523977 | SCN4B   | Intron     | 0.96 | 8.61E-02 | C | T | 0.98 (0.72 - 1.34) | 8.97 X 10 <sup>-01</sup> | 0.98 (0.76 - 1.27) | 9.02 X 10 <sup>-01</sup> |
| rs678262   | 11 | 117526950 | SCN4B   | Intron     | 0.98 | 9.61E-01 | C | G | 0.98 (0.72 - 1.35) | 9.21 X 10 <sup>-01</sup> | 1.05 (0.81 - 1.35) | 7.26 X 10 <sup>-01</sup> |
| rs11216788 | 11 | 117539411 | SCN4B   | 3'UTR      | 0.98 | 5.68E-01 | A | G | 0.81 (0.58 - 1.13) | 2.10 X 10 <sup>-01</sup> | 1.08 (0.82 - 1.42) | 5.82 X 10 <sup>-01</sup> |
| rs676685   | 11 | 117542152 | SCN4B   | 3'UTR      | 0.99 | 2.45E-01 | C | T | 0.78 (0.56 - 1.08) | 1.39 X 10 <sup>-01</sup> | 1.08 (0.83 - 1.41) | 5.74 X 10 <sup>-01</sup> |
| rs679327   | 11 | 117548184 | SCN4B   | Intron     | 0.97 | 6.53E-03 | C | T | 1.06 (0.74 - 1.50) | 7.66 X 10 <sup>-01</sup> | 0.96 (0.72 - 1.28) | 7.69 X 10 <sup>-01</sup> |
| rs4537793  | 11 | 117558366 | SCN4B   | Promoter   | 0.98 | 2.16E-01 | C | T | 1.19 (0.77 - 1.85) | 4.35 X 10 <sup>-01</sup> | 1.08 (0.75 - 1.56) | 6.67 X 10 <sup>-01</sup> |
| rs7944321  | 11 | 117561011 | SCN4B   | Promoter   | 0.98 | 1.08E-01 | A | G | 1.28 (0.86 - 1.90) | 2.23 X 10 <sup>-01</sup> | 1.00 (0.72 - 1.38) | 9.94 X 10 <sup>-01</sup> |
| rs1805     | 11 | 117581279 | SCN4B   | Intron     | 0.98 | 7.32E-01 | A | C | 1.28 (0.94 - 1.75) | 1.17 X 10 <sup>-01</sup> | 0.93 (0.72 - 1.20) | 5.64 X 10 <sup>-01</sup> |
| rs1715438  | 11 | 117603251 | SCN4B   | Downstream | 0.99 | 3.30E-01 | A | G | 1.29 (0.91 - 1.84) | 1.54 X 10 <sup>-01</sup> | 0.95 (0.72 - 1.26) | 7.29 X 10 <sup>-01</sup> |
| rs12361791 | 11 | 117605386 | SCN4B   | Downstream | 0.98 | 1.00E+00 | G | T | 1.07 (0.56 - 2.05) | 8.41 X 10 <sup>-01</sup> | 1.05 (0.63 - 1.75) | 8.65 X 10 <sup>-01</sup> |
| rs12419365 | 11 | 117617542 | SCN4B   | Intron     | 0.99 | 1.19E-01 | A | C | 1.59 (0.93 - 2.70) | 9.01 X 10 <sup>-02</sup> | 1.11 (0.74 - 1.67) | 6.04 X 10 <sup>-01</sup> |
| rs10502228 | 11 | 117618793 | SCN4B   | Intron     | 0.98 | 1.90E-01 | A | G | 1.16 (0.79 - 1.70) | 4.60 X 10 <sup>-01</sup> | 0.97 (0.70 - 1.34) | 8.46 X 10 <sup>-01</sup> |
| rs12229242 | 12 | 1904551   | CACNA1C | Promoter   | 0.98 | 2.33E-02 | A | G | 0.87 (0.62 - 1.21) | 4.04 X 10 <sup>-01</sup> | 1.02 (0.78 - 1.33) | 8.80 X 10 <sup>-01</sup> |
| rs10848596 | 12 | 1905148   | CACNA1C | Promoter   | 0.98 | 6.64E-03 | A | G | 0.88 (0.63 - 1.24) | 4.75 X 10 <sup>-01</sup> | 1.11 (0.84 - 1.47) | 4.50 X 10 <sup>-01</sup> |
| rs11610387 | 12 | 1906402   | CACNA1C | Promoter   | 0.97 | 1.34E-04 | C | T | 0.87 (0.63 - 1.19) | 3.75 X 10 <sup>-01</sup> | 1.11 (0.86 - 1.43) | 4.37 X 10 <sup>-01</sup> |
| rs2470400  | 12 | 1910002   | CACNA1C |            | 0.96 | 5.41E-03 | G | T | 1.04 (0.72 - 1.49) | 8.32 X 10 <sup>-01</sup> | 1.26 (0.94 - 1.69) | 1.18 X 10 <sup>-01</sup> |
| rs10774008 | 12 | 1912167   | CACNA1C |            | 0.97 | 6.33E-01 | A | G | 0.83 (0.58 - 1.19) | 3.22 X 10 <sup>-01</sup> | 0.84 (0.62 - 1.14) | 2.62 X 10 <sup>-01</sup> |
| rs2470408  | 12 | 1913879   | CACNA1C |            | 0.97 | 7.26E-03 | A | C | 1.29 (0.93 - 1.79) | 1.24 X 10 <sup>-01</sup> | 1.09 (0.85 - 1.41) | 5.01 X 10 <sup>-01</sup> |
| rs2159098  | 12 | 1914751   | CACNA1C |            | 0.99 | 5.25E-02 | A | C | 0.81 (0.55 - 1.20) | 2.91 X 10 <sup>-01</sup> | 1.03 (0.75 - 1.40) | 8.58 X 10 <sup>-01</sup> |
| rs2429175  | 12 | 1915346   | CACNA1C |            | 0.98 | 9.75E-02 | A | G | 0.89 (0.61 - 1.31) | 5.62 X 10 <sup>-01</sup> | 1.02 (0.75 - 1.39) | 9.05 X 10 <sup>-01</sup> |
| rs2429176  | 12 | 1915452   | CACNA1C |            | 0.95 | 1.71E-01 | C | T | 1.28 (0.90 - 1.81) | 1.66 X 10 <sup>-01</sup> | 1.03 (0.78 - 1.35) | 8.41 X 10 <sup>-01</sup> |
| rs9669556  | 12 | 1915901   | CACNA1C | Downstream | 0.97 | 1.77E-01 | A | G | 1.71 (1.02 - 2.87) | 4.09 X 10 <sup>-02</sup> | 1.16 (0.76 - 1.77) | 4.99 X 10 <sup>-01</sup> |
| rs763555   | 12 | 1916543   | CACNA1C | Downstream | 0.99 | 2.58E-28 | C | G | 0.82 (0.51 - 1.32) | 4.16 X 10 <sup>-01</sup> | 1.20 (0.82 - 1.75) | 3.52 X 10 <sup>-01</sup> |
| rs7222     | 12 | 1925527   | CACNA1C | 3'UTR      | 0.97 | 7.32E-01 | A | G | 1.13 (0.83 - 1.54) | 4.46 X 10 <sup>-01</sup> | 1.09 (0.84 - 1.42) | 5.03 X 10 <sup>-01</sup> |
| rs10505725 | 12 | 1926624   | CACNA1C | Intron     | 0.98 | 9.09E-01 | A | G | 0.85 (0.58 - 1.23) | 3.77 X 10 <sup>-01</sup> | 0.95 (0.72 - 1.26) | 7.23 X 10 <sup>-01</sup> |
| rs17694584 | 12 | 1927548   | CACNA1C | Intron     | 0.99 | 3.38E-02 | G | T | 1.05 (0.49 - 2.24) | 9.10 X 10 <sup>-01</sup> | 0.73 (0.41 - 1.31) | 2.90 X 10 <sup>-01</sup> |
| rs2010932  | 12 | 1956243   | CACNA1C | Intron     | 0.97 | 7.48E-01 | C | T | 1.30 (0.89 - 1.89) | 1.82 X 10 <sup>-01</sup> | 1.05 (0.78 - 1.41) | 7.63 X 10 <sup>-01</sup> |
| rs972657   | 12 | 1956586   | CACNA1C |            | 0.97 | 6.03E-01 | C | T | 0.68 (0.42 - 1.10) | 1.18 X 10 <sup>-01</sup> | 0.91 (0.62 - 1.33) | 6.14 X 10 <sup>-01</sup> |
| rs2017273  | 12 | 1970284   | CACNA1C | Intron     | 0.98 | 2.81E-01 | C | G | 1.32 (0.93 - 1.89) | 1.23 X 10 <sup>-01</sup> | 1.03 (0.78 - 1.37) | 8.30 X 10 <sup>-01</sup> |
| rs2159095  | 12 | 1986630   | CACNA1C | Promoter   | 0.97 | 3.55E-01 | A | T | 0.84 (0.60 - 1.16) | 2.86 X 10 <sup>-01</sup> | 0.94 (0.73 - 1.22) | 6.51 X 10 <sup>-01</sup> |
| rs12316650 | 12 | 1986881   | CACNA1C | Promoter   | 0.97 | 4.88E-02 | G | T | 0.91 (0.65 - 1.28) | 5.93 X 10 <sup>-01</sup> | 0.95 (0.73 - 1.25) | 7.21 X 10 <sup>-01</sup> |
| rs17801032 | 12 | 1989620   | CACNA1C | Promoter   | 0.93 | 1.89E-27 | A | G | 0.81 (0.54 - 1.22) | 3.13 X 10 <sup>-01</sup> | 0.90 (0.65 - 1.25) | 5.25 X 10 <sup>-01</sup> |
| rs987740   | 12 | 1989629   | CACNA1C | Promoter   | 0.99 | 4.26E-17 | C | T | 0.81 (0.57 - 1.15) | 2.36 X 10 <sup>-01</sup> | 0.91 (0.68 - 1.21) | 5.01 X 10 <sup>-01</sup> |
| rs2067490  | 12 | 1997035   | CACNA1C |            | 0.98 | 2.12E-01 | C | G | 0.77 (0.54 - 1.11) | 1.61 X 10 <sup>-01</sup> | 0.87 (0.64 - 1.17) | 3.47 X 10 <sup>-01</sup> |

|            |    |         |         |          |      |           |   |   |                    |                          |                    |                          |
|------------|----|---------|---------|----------|------|-----------|---|---|--------------------|--------------------------|--------------------|--------------------------|
| rs4765876  | 12 | 2003362 | CACNA1C |          | 0.98 | 4.56E-01  | A | C | 0.95 (0.69 - 1.31) | 7.45 X 10 <sup>-01</sup> | 1.02 (0.78 - 1.34) | 8.77 X 10 <sup>-01</sup> |
| rs727528   | 12 | 2005287 | CACNA1C |          | 0.96 | 5.16E-01  | A | G | 1.16 (0.84 - 1.61) | 3.69 X 10 <sup>-01</sup> | 0.92 (0.71 - 1.20) | 5.44 X 10 <sup>-01</sup> |
| rs11062078 | 12 | 2005748 | CACNA1C |          | 0.98 | 3.97E-01  | C | T | 0.80 (0.55 - 1.14) | 2.15 X 10 <sup>-01</sup> | 1.06 (0.79 - 1.42) | 6.90 X 10 <sup>-01</sup> |
| rs2470417  | 12 | 2008559 | CACNA1C |          | 0.99 | 6.57E-01  | A | G | 0.72 (0.49 - 1.07) | 1.01 X 10 <sup>-01</sup> | 1.12 (0.82 - 1.54) | 4.81 X 10 <sup>-01</sup> |
| rs2429144  | 12 | 2008723 | CACNA1C |          | 0.98 | 5.09E-01  | A | T | 1.10 (0.78 - 1.55) | 6.03 X 10 <sup>-01</sup> | 0.89 (0.68 - 1.16) | 3.71 X 10 <sup>-01</sup> |
| rs1006385  | 12 | 2013243 | CACNA1C |          | 0.98 | 1.20E-01  | A | G | 1.01 (0.73 - 1.39) | 9.62 X 10 <sup>-01</sup> | 0.94 (0.72 - 1.22) | 6.41 X 10 <sup>-01</sup> |
| rs7976547  | 12 | 2019114 | CACNA1C |          | 0.97 | 3.84E-01  | C | T | 0.71 (0.40 - 1.25) | 2.35 X 10 <sup>-01</sup> | 1.15 (0.72 - 1.82) | 5.61 X 10 <sup>-01</sup> |
| rs9888368  | 12 | 2023877 | CACNA1C | Promoter | 0.99 | 6.14E-01  | A | G | 1.00 (0.66 - 1.51) | 9.89 X 10 <sup>-01</sup> | 1.03 (0.72 - 1.47) | 8.77 X 10 <sup>-01</sup> |
| rs2429151  | 12 | 2024582 | CACNA1C | Promoter | 0.94 | 5.22E-07  | C | T | 1.05 (0.72 - 1.52) | 7.99 X 10 <sup>-01</sup> | 1.03 (0.76 - 1.40) | 8.62 X 10 <sup>-01</sup> |
| rs765125   | 12 | 2026468 | CACNA1C | Promoter | 0.98 | 8.44E-01  | G | T | 0.84 (0.61 - 1.15) | 2.71 X 10 <sup>-01</sup> | 1.10 (0.85 - 1.43) | 4.62 X 10 <sup>-01</sup> |
| rs2108636  | 12 | 2029854 | CACNA1C | Promoter | 0.99 | 2.81E-02  | G | T | 0.87 (0.62 - 1.22) | 4.19 X 10 <sup>-01</sup> | 1.16 (0.89 - 1.53) | 2.78 X 10 <sup>-01</sup> |
| rs12371253 | 12 | 2039058 | CACNA1C | Intron   | 0.98 | 3.53E-01  | C | G | 0.97 (0.63 - 1.49) | 8.82 X 10 <sup>-01</sup> | 1.04 (0.72 - 1.52) | 8.19 X 10 <sup>-01</sup> |
| rs7972947  | 12 | 2040694 | CACNA1C | Intron   | 0.99 | 1.13E-01  | A | C | 0.70 (0.48 - 1.01) | 5.72 X 10 <sup>-02</sup> | 1.03 (0.77 - 1.39) | 8.36 X 10 <sup>-01</sup> |
| rs2238013  | 12 | 2045305 | CACNA1C | Intron   | 0.98 | 7.30E-01  | A | T | 1.14 (0.82 - 1.58) | 4.40 X 10 <sup>-01</sup> | 1.04 (0.80 - 1.36) | 7.45 X 10 <sup>-01</sup> |
| rs2238017  | 12 | 2048806 | CACNA1C | Intron   | 0.99 | 4.57E-01  | A | G | 1.62 (1.16 - 2.28) | 5.31 X 10 <sup>-03</sup> | 1.37 (1.05 - 1.78) | 2.22 X 10 <sup>-02</sup> |
| rs2238018  | 12 | 2048922 | CACNA1C | Intron   | 0.99 | 7.60E-01  | C | T | 2.22 (1.45 - 3.41) | 2.53 X 10 <sup>-04</sup> | 1.32 (0.97 - 1.79) | 7.94 X 10 <sup>-02</sup> |
| rs2283270  | 12 | 2052454 | CACNA1C | Intron   | 0.98 | 1.41E-01  | A | G | 1.02 (0.66 - 1.58) | 9.24 X 10 <sup>-01</sup> | 1.03 (0.74 - 1.43) | 8.83 X 10 <sup>-01</sup> |
| rs2238022  | 12 | 2056739 | CACNA1C | Intron   | 0.98 | 3.76E-01  | C | T | 1.08 (0.73 - 1.60) | 6.86 X 10 <sup>-01</sup> | 1.07 (0.80 - 1.45) | 6.48 X 10 <sup>-01</sup> |
| rs10774022 | 12 | 2065375 | CACNA1C | Intron   | 0.99 | 2.17E-02  | G | T | 1.06 (0.58 - 1.93) | 8.46 X 10 <sup>-01</sup> | 0.68 (0.43 - 1.09) | 1.08 X 10 <sup>-01</sup> |
| rs727267   | 12 | 2077877 | CACNA1C | Intron   | 0.98 | 1.05E-01  | C | G | 1.09 (0.78 - 1.52) | 6.00 X 10 <sup>-01</sup> | 1.05 (0.80 - 1.38) | 7.22 X 10 <sup>-01</sup> |
| rs2283280  | 12 | 2078651 | CACNA1C | Intron   | 0.97 | 4.57E-01  | A | C | 0.67 (0.39 - 1.13) | 1.32 X 10 <sup>-01</sup> | 0.73 (0.46 - 1.15) | 1.77 X 10 <sup>-01</sup> |
| rs1558322  | 12 | 2100316 | CACNA1C | Intron   | 0.99 | 6.68E-01  | C | T | 1.01 (0.71 - 1.46) | 9.40 X 10 <sup>-01</sup> | 0.93 (0.69 - 1.25) | 6.32 X 10 <sup>-01</sup> |
| rs2247833  | 12 | 2102418 | CACNA1C | Intron   | 0.97 | 2.23E-01  | A | T | 1.09 (0.78 - 1.52) | 6.26 X 10 <sup>-01</sup> | 0.82 (0.62 - 1.08) | 1.54 X 10 <sup>-01</sup> |
| rs2283285  | 12 | 2104543 | CACNA1C | Intron   | 0.97 | 9.49E-01  | C | G | 1.25 (0.86 - 1.81) | 2.37 X 10 <sup>-01</sup> | 0.97 (0.72 - 1.30) | 8.24 X 10 <sup>-01</sup> |
| rs1122864  | 12 | 2106303 | CACNA1C | Intron   | 0.99 | 1.71E-01  | C | T | 1.16 (0.79 - 1.70) | 4.55 X 10 <sup>-01</sup> | 0.87 (0.64 - 1.17) | 3.45 X 10 <sup>-01</sup> |
| rs2238036  | 12 | 2107103 | CACNA1C | Intron   | 0.96 | 1.05E-207 | A | G | 1.31 (0.95 - 1.81) | 1.02 X 10 <sup>-01</sup> | 1.24 (0.96 - 1.59) | 9.56 X 10 <sup>-02</sup> |
| rs2238039  | 12 | 2129210 | CACNA1C | Intron   | 0.99 | 3.80E-03  | C | G | 0.86 (0.49 - 1.50) | 5.92 X 10 <sup>-01</sup> | 1.01 (0.62 - 1.64) | 9.76 X 10 <sup>-01</sup> |
| rs7302743  | 12 | 2139849 | CACNA1C | Intron   | 0.96 | 3.24E-01  | C | T | 0.68 (0.46 - 1.01) | 5.40 X 10 <sup>-02</sup> | 1.03 (0.74 - 1.42) | 8.77 X 10 <sup>-01</sup> |
| rs2238043  | 12 | 2145924 | CACNA1C | Intron   | 0.95 | 4.78E-01  | A | G | 1.03 (0.73 - 1.45) | 8.52 X 10 <sup>-01</sup> | 1.05 (0.80 - 1.36) | 7.38 X 10 <sup>-01</sup> |
| rs2239016  | 12 | 2153653 | CACNA1C | Intron   | 0.97 | 3.50E-03  | A | G | 1.19 (0.85 - 1.66) | 3.07 X 10 <sup>-01</sup> | 1.02 (0.78 - 1.33) | 9.04 X 10 <sup>-01</sup> |
| rs3794299  | 12 | 2156245 | CACNA1C | Intron   | 0.98 | 1.83E-01  | C | T | 1.04 (0.65 - 1.65) | 8.72 X 10 <sup>-01</sup> | 0.81 (0.55 - 1.19) | 2.73 X 10 <sup>-01</sup> |
| rs2239017  | 12 | 2159912 | CACNA1C | Intron   | 0.98 | 7.66E-02  | C | G | 1.20 (0.87 - 1.67) | 2.68 X 10 <sup>-01</sup> | 1.05 (0.82 - 1.36) | 6.95 X 10 <sup>-01</sup> |
| rs2238053  | 12 | 2187357 | CACNA1C | Intron   | 0.98 | 9.15E-01  | C | T | 0.95 (0.68 - 1.34) | 7.76 X 10 <sup>-01</sup> | 0.99 (0.76 - 1.28) | 9.12 X 10 <sup>-01</sup> |
| rs2238056  | 12 | 2198205 | CACNA1C | Intron   | 0.98 | 6.60E-01  | C | T | 0.93 (0.67 - 1.30) | 6.75 X 10 <sup>-01</sup> | 1.20 (0.93 - 1.55) | 1.65 X 10 <sup>-01</sup> |
| rs11062169 | 12 | 2215651 | CACNA1C | Intron   | 0.99 | 1.46E-01  | C | T | 0.90 (0.48 - 1.69) | 7.40 X 10 <sup>-01</sup> | 0.92 (0.55 - 1.53) | 7.42 X 10 <sup>-01</sup> |
| rs882195   | 12 | 2220662 | CACNA1C | Intron   | 0.98 | 1.00E+00  | C | G | 0.84 (0.60 - 1.17) | 2.99 X 10 <sup>-01</sup> | 1.11 (0.86 - 1.44) | 4.26 X 10 <sup>-01</sup> |
| rs882193   | 12 | 2220881 | CACNA1C | Intron   | 0.95 | 7.56E-01  | C | T | 0.82 (0.57 - 1.17) | 2.78 X 10 <sup>-01</sup> | 0.96 (0.74 - 1.25) | 7.59 X 10 <sup>-01</sup> |
| rs2370413  | 12 | 2225131 | CACNA1C | Intron   | 0.98 | 6.26E-01  | C | T | 1.00 (0.72 - 1.38) | 9.86 X 10 <sup>-01</sup> | 1.26 (0.97 - 1.63) | 8.64 X 10 <sup>-02</sup> |
| rs758170   | 12 | 2231721 | CACNA1C | Intron   | 0.99 | 7.76E-01  | C | T | 0.87 (0.60 - 1.26) | 4.50 X 10 <sup>-01</sup> | 0.98 (0.74 - 1.30) | 8.79 X 10 <sup>-01</sup> |
| rs2239038  | 12 | 2244391 | CACNA1C | Intron   | 0.98 | 9.19E-01  | A | G | 0.93 (0.66 - 1.31) | 6.67 X 10 <sup>-01</sup> | 1.15 (0.89 - 1.50) | 2.87 X 10 <sup>-01</sup> |
| rs10848645 | 12 | 2290505 | CACNA1C | Intron   | 0.98 | 3.17E-02  | A | G | 1.04 (0.75 - 1.43) | 8.35 X 10 <sup>-01</sup> | 1.07 (0.83 - 1.37) | 6.24 X 10 <sup>-01</sup> |
| rs10774037 | 12 | 2290787 | CACNA1C | Intron   | 0.97 | 1.66E-01  | A | G | 0.82 (0.55 - 1.24) | 3.48 X 10 <sup>-01</sup> | 0.98 (0.70 - 1.38) | 9.28 X 10 <sup>-01</sup> |
| rs2108570  | 12 | 2291849 | CACNA1C | Intron   | 0.99 | 6.51E-01  | C | T | 0.92 (0.62 - 1.37) | 6.81 X 10 <sup>-01</sup> | 1.04 (0.75 - 1.44) | 8.03 X 10 <sup>-01</sup> |
| rs2239041  | 12 | 2298398 | CACNA1C | Intron   | 0.98 | 9.52E-01  | A | G | 1.09 (0.76 - 1.57) | 6.29 X 10 <sup>-01</sup> | 1.06 (0.80 - 1.42) | 6.81 X 10 <sup>-01</sup> |
| rs2239046  | 12 | 2304680 | CACNA1C | Intron   | 0.97 | 6.54E-01  | A | G | 1.01 (0.71 - 1.44) | 9.36 X 10 <sup>-01</sup> | 1.08 (0.82 - 1.42) | 5.72 X 10 <sup>-01</sup> |
| rs2239048  | 12 | 2307978 | CACNA1C | Intron   | 0.98 | 8.84E-01  | A | G | 0.78 (0.46 - 1.31) | 3.41 X 10 <sup>-01</sup> | 1.02 (0.65 - 1.61) | 9.35 X 10 <sup>-01</sup> |
| rs7979389  | 12 | 2311723 | CACNA1C | Intron   | 0.99 | 1.00E+00  | A | G | 1.00 (0.73 - 1.37) | 9.91 X 10 <sup>-01</sup> | 1.18 (0.91 - 1.54) | 2.14 X 10 <sup>-01</sup> |
| rs2283302  | 12 | 2322880 | CACNA1C | Intron   | 0.98 | 7.20E-01  | A | G | 1.03 (0.73 - 1.45) | 8.61 X 10 <sup>-01</sup> | 1.08 (0.81 - 1.43) | 6.07 X 10 <sup>-01</sup> |
| rs2238070  | 12 | 2326376 | CACNA1C | Intron   | 0.98 | 1.72E-01  | G | T | 1.00 (0.73 - 1.37) | 9.96 X 10 <sup>-01</sup> | 1.19 (0.93 - 1.54) | 1.73 X 10 <sup>-01</sup> |
| rs11062196 | 12 | 2330368 | CACNA1C | Intron   | 0.98 | 1.49E-01  | A | G | 0.87 (0.59 - 1.29) | 4.95 X 10 <sup>-01</sup> | 1.01 (0.74 - 1.38) | 9.51 X 10 <sup>-01</sup> |
| rs740419   | 12 | 2335625 | CACNA1C | Intron   | 0.98 | 5.03E-01  | A | G | 1.18 (0.84 - 1.65) | 3.39 X 10 <sup>-01</sup> | 0.85 (0.65 - 1.10) | 2.16 X 10 <sup>-01</sup> |
| rs2238077  | 12 | 2336345 | CACNA1C | Intron   | 0.97 | 9.69E-02  | A | G | 0.83 (0.55 - 1.25) | 3.71 X 10 <sup>-01</sup> | 1.13 (0.80 - 1.61) | 4.81 X 10 <sup>-01</sup> |
| rs2239059  | 12 | 2362010 | CACNA1C | Intron   | 0.98 | 5.40E-01  | C | T | 0.91 (0.66 - 1.26) | 5.63 X 10 <sup>-01</sup> | 1.01 (0.78 - 1.31) | 9.35 X 10 <sup>-01</sup> |
| rs4370987  | 12 | 2365187 | CACNA1C | Intron   | 0.98 | 1.16E-01  | A | G | 0.77 (0.55 - 1.09) | 1.45 X 10 <sup>-01</sup> | 0.77 (0.59 - 1.02) | 6.55 X 10 <sup>-02</sup> |
| rs753078   | 12 | 2369583 | CACNA1C | Intron   | 0.97 | 7.89E-01  | A | T | 1.10 (0.76 - 1.60) | 6.10 X 10 <sup>-01</sup> | 1.02 (0.76 - 1.39) | 8.80 X 10 <sup>-01</sup> |
| rs10160993 | 12 | 2369826 | CACNA1C | Intron   | 0.98 | 8.06E-01  | C | G | 0.94 (0.67 - 1.32) | 7.25 X 10 <sup>-01</sup> | 0.92 (0.71 - 1.20) | 5.37 X 10 <sup>-01</sup> |
| rs2887780  | 12 | 2369887 | CACNA1C | Intron   | 0.98 | 2.95E-01  | C | T | 1.10 (0.78 - 1.57) | 5.86 X 10 <sup>-01</sup> | 1.24 (0.94 - 1.64) | 1.33 X 10 <sup>-01</sup> |
| rs740416   | 12 | 2370153 | CACNA1C | Intron   | 0.97 | 6.41E-01  | C | T | 0.92 (0.65 - 1.31) | 6.58 X 10 <sup>-01</sup> | 0.93 (0.71 - 1.23) | 6.20 X 10 <sup>-01</sup> |
| rs7968680  | 12 | 2370464 | CACNA1C | Intron   | 0.97 | 6.50E-01  | C | T | 1.22 (0.82 - 1.81) | 3.30 X 10 <sup>-01</sup> | 1.31 (0.95 - 1.81) | 1.00 X 10 <sup>-01</sup> |
| rs4441076  | 12 | 2372319 | CACNA1C | Intron   | 0.98 | 3.98E-01  | C | T | 1.02 (0.72 - 1.42) | 9.33 X 10 <sup>-01</sup> | 0.93 (0.71 - 1.21) | 5.85 X 10 <sup>-01</sup> |
| rs2239063  | 12 | 2382092 | CACNA1C | Intron   | 0.98 | 8.07E-01  | A | C | 0.91 (0.63 - 1.33) | 6.26 X 10 <sup>-01</sup> | 0.88 (0.66 - 1.18) | 3.85 X 10 <sup>-01</sup> |
| rs11831085 | 12 | 2385119 | CACNA1C | Intron   | 0.98 | 4.32E-01  | A | G | 0.99 (0.64 - 1.53) | 9.66 X 10 <sup>-01</sup> | 0.96 (0.68 - 1.35) | 7.94 X 10 <sup>-01</sup> |
| rs2887781  | 12 | 2391141 | CACNA1C | Intron   | 0.96 | 1.88E-01  | A | T | 0.77 (0.54 - 1.10) | 1.51 X 10 <sup>-01</sup> | 0.81 (0.61 - 1.07) | 1.37 X 10 <sup>-01</sup> |
| rs1009281  | 12 | 2399245 | CACNA1C | Intron   | 0.96 | 4.29E-01  | A | G | 1.07 (0.78 - 1.46) | 6.76 X 10 <sup>-01</sup> | 1.10 (0.85 - 1.42) | 4.91 X 10 <sup>-01</sup> |

|            |    |         |         |        |      |          |   |   |                    |                          |                    |                          |
|------------|----|---------|---------|--------|------|----------|---|---|--------------------|--------------------------|--------------------|--------------------------|
| rs2239065  | 12 | 2402428 | CACNA1C | Intron | 0.98 | 5.26E-02 | A | G | 0.84 (0.61 - 1.17) | 3.01 X 10 <sup>-01</sup> | 0.90 (0.69 - 1.19) | 4.64 X 10 <sup>-01</sup> |
| rs994899   | 12 | 2403765 | CACNA1C | Intron | 0.98 | 6.98E-01 | C | G | 0.91 (0.63 - 1.31) | 6.11 X 10 <sup>-01</sup> | 1.04 (0.76 - 1.42) | 8.08 X 10 <sup>-01</sup> |
| rs2239071  | 12 | 2405355 | CACNA1C | Intron | 0.99 | 7.66E-01 | C | G | 1.07 (0.77 - 1.49) | 6.86 X 10 <sup>-01</sup> | 0.87 (0.66 - 1.14) | 3.12 X 10 <sup>-01</sup> |
| rs4765678  | 12 | 2406556 | CACNA1C | Intron | 0.98 | 1.51E-01 | C | T | 1.02 (0.69 - 1.51) | 9.38 X 10 <sup>-01</sup> | 1.18 (0.86 - 1.62) | 2.98 X 10 <sup>-01</sup> |
| rs2239073  | 12 | 2408761 | CACNA1C | Intron | 0.98 | 5.56E-01 | C | T | 0.98 (0.70 - 1.38) | 9.20 X 10 <sup>-01</sup> | 0.82 (0.63 - 1.07) | 1.39 X 10 <sup>-01</sup> |
| rs2239074  | 12 | 2408810 | CACNA1C | Intron | 0.98 | 8.70E-01 | C | T | 0.98 (0.71 - 1.37) | 9.26 X 10 <sup>-01</sup> | 1.12 (0.85 - 1.48) | 4.34 X 10 <sup>-01</sup> |
| rs1860097  | 12 | 2411269 | CACNA1C | Intron | 0.98 | 1.23E-01 | C | T | 1.13 (0.77 - 1.65) | 5.38 X 10 <sup>-01</sup> | 1.15 (0.86 - 1.55) | 3.49 X 10 <sup>-01</sup> |
| rs10774043 | 12 | 2413361 | CACNA1C | Intron | 0.98 | 6.76E-01 | A | G | 0.77 (0.55 - 1.08) | 1.29 X 10 <sup>-01</sup> | 0.97 (0.74 - 1.27) | 8.22 X 10 <sup>-01</sup> |
| rs11062228 | 12 | 2414985 | CACNA1C | Intron | 0.98 | 8.07E-01 | A | G | 0.98 (0.70 - 1.36) | 8.84 X 10 <sup>-01</sup> | 0.91 (0.70 - 1.18) | 4.65 X 10 <sup>-01</sup> |
| rs11062229 | 12 | 2415047 | CACNA1C | Intron | 0.99 | 6.93E-01 | C | G | 1.07 (0.73 - 1.57) | 7.36 X 10 <sup>-01</sup> | 1.07 (0.77 - 1.49) | 6.95 X 10 <sup>-01</sup> |
| rs7960297  | 12 | 2416780 | CACNA1C | Intron | 0.98 | 4.72E-01 | A | T | 1.62 (0.89 - 2.96) | 1.14 X 10 <sup>-01</sup> | 0.82 (0.53 - 1.28) | 3.92 X 10 <sup>-01</sup> |
| rs17801211 | 12 | 2417003 | CACNA1C | Intron | 0.99 | 5.06E-01 | A | G | 1.21 (0.85 - 1.72) | 2.85 X 10 <sup>-01</sup> | 0.94 (0.71 - 1.24) | 6.56 X 10 <sup>-01</sup> |
| rs7313403  | 12 | 2418535 | CACNA1C | Intron | 0.99 | 6.61E-01 | A | G | 0.93 (0.61 - 1.42) | 7.42 X 10 <sup>-01</sup> | 1.15 (0.82 - 1.62) | 4.25 X 10 <sup>-01</sup> |
| rs4765679  | 12 | 2419279 | CACNA1C | Intron | 0.99 | 4.44E-01 | C | G | 0.78 (0.55 - 1.12) | 1.85 X 10 <sup>-01</sup> | 0.95 (0.70 - 1.27) | 7.17 X 10 <sup>-01</sup> |
| rs2239080  | 12 | 2424950 | CACNA1C | Intron | 0.98 | 2.33E-01 | A | G | 1.24 (0.88 - 1.76) | 2.20 X 10 <sup>-01</sup> | 0.93 (0.71 - 1.22) | 6.15 X 10 <sup>-01</sup> |
| rs1544514  | 12 | 2428447 | CACNA1C | Exon   | 0.98 | 3.39E-01 | A | G | 0.85 (0.58 - 1.23) | 3.80 X 10 <sup>-01</sup> | 0.96 (0.71 - 1.30) | 7.77 X 10 <sup>-01</sup> |
| rs4765934  | 12 | 2430089 | CACNA1C | Intron | 0.99 | 3.42E-01 | A | G | 1.08 (0.75 - 1.54) | 6.90 X 10 <sup>-01</sup> | 0.86 (0.65 - 1.13) | 2.73 X 10 <sup>-01</sup> |
| rs10848658 | 12 | 2431514 | CACNA1C | Intron | 0.98 | 6.60E-01 | C | T | 1.03 (0.74 - 1.43) | 8.68 X 10 <sup>-01</sup> | 1.00 (0.77 - 1.29) | 9.84 X 10 <sup>-01</sup> |
| rs10774048 | 12 | 2432802 | CACNA1C | Intron | 0.99 | 9.43E-01 | C | T | 1.27 (0.86 - 1.87) | 2.32 X 10 <sup>-01</sup> | 1.19 (0.88 - 1.62) | 2.56 X 10 <sup>-01</sup> |
| rs4765936  | 12 | 2433737 | CACNA1C | Intron | 0.98 | 5.26E-01 | A | G | 0.89 (0.63 - 1.25) | 4.87 X 10 <sup>-01</sup> | 0.97 (0.73 - 1.28) | 8.29 X 10 <sup>-01</sup> |
| rs758231   | 12 | 2436562 | CACNA1C | Intron | 0.98 | 9.08E-01 | G | T | 1.08 (0.65 - 1.78) | 7.71 X 10 <sup>-01</sup> | 0.97 (0.65 - 1.44) | 8.76 X 10 <sup>-01</sup> |
| rs4765937  | 12 | 2440796 | CACNA1C | Intron | 0.97 | 2.56E-02 | C | T | 0.85 (0.61 - 1.19) | 3.50 X 10 <sup>-01</sup> | 0.94 (0.73 - 1.23) | 6.64 X 10 <sup>-01</sup> |
| rs16929447 | 12 | 2444306 | CACNA1C | Intron | 0.98 | 8.03E-01 | C | T | 1.15 (0.81 - 1.63) | 4.29 X 10 <sup>-01</sup> | 1.30 (0.98 - 1.74) | 7.19 X 10 <sup>-02</sup> |
| rs4765938  | 12 | 2444874 | CACNA1C | Intron | 0.97 | 2.50E-01 | A | G | 1.11 (0.81 - 1.53) | 5.07 X 10 <sup>-01</sup> | 0.88 (0.68 - 1.13) | 3.18 X 10 <sup>-01</sup> |
| rs11836925 | 12 | 2450241 | CACNA1C | Intron | 0.98 | 7.78E-01 | A | G | 1.28 (0.83 - 1.99) | 2.65 X 10 <sup>-01</sup> | 1.19 (0.85 - 1.68) | 3.14 X 10 <sup>-01</sup> |
| rs7968723  | 12 | 2453073 | CACNA1C | Intron | 0.98 | 3.92E-01 | A | G | 1.22 (0.85 - 1.74) | 2.79 X 10 <sup>-01</sup> | 0.96 (0.74 - 1.27) | 7.95 X 10 <sup>-01</sup> |
| rs2283316  | 12 | 2459832 | CACNA1C | Intron | 0.99 | 3.14E-01 | C | T | 1.22 (0.86 - 1.73) | 2.61 X 10 <sup>-01</sup> | 1.04 (0.80 - 1.36) | 7.68 X 10 <sup>-01</sup> |
| rs2239089  | 12 | 2460249 | CACNA1C | Intron | 0.98 | 8.83E-01 | A | G | 0.79 (0.57 - 1.10) | 1.62 X 10 <sup>-01</sup> | 0.78 (0.60 - 1.02) | 7.30 X 10 <sup>-02</sup> |
| rs1541452  | 12 | 2472440 | CACNA1C | Intron | 0.98 | 7.62E-01 | A | G | 1.02 (0.72 - 1.45) | 9.18 X 10 <sup>-01</sup> | 1.16 (0.87 - 1.56) | 3.16 X 10 <sup>-01</sup> |
| rs2108705  | 12 | 2475538 | CACNA1C | Intron | 0.97 | 6.18E-01 | A | G | 0.89 (0.56 - 1.40) | 6.00 X 10 <sup>-01</sup> | 1.03 (0.71 - 1.49) | 8.74 X 10 <sup>-01</sup> |
| rs10848665 | 12 | 2479345 | CACNA1C | Intron | 0.97 | 4.05E-01 | C | T | 1.16 (0.79 - 1.71) | 4.44 X 10 <sup>-01</sup> | 0.96 (0.70 - 1.30) | 7.71 X 10 <sup>-01</sup> |
| rs10848666 | 12 | 2479535 | CACNA1C | Intron | 0.99 | 9.31E-01 | A | G | 1.03 (0.67 - 1.60) | 8.89 X 10 <sup>-01</sup> | 0.99 (0.70 - 1.40) | 9.37 X 10 <sup>-01</sup> |
| rs2239093  | 12 | 2479823 | CACNA1C | Intron | 0.98 | 2.23E-01 | A | G | 0.72 (0.44 - 1.20) | 2.08 X 10 <sup>-01</sup> | 0.91 (0.60 - 1.38) | 6.55 X 10 <sup>-01</sup> |
| rs2283318  | 12 | 2480902 | CACNA1C | Intron | 0.98 | 9.21E-01 | A | G | 0.85 (0.61 - 1.17) | 3.15 X 10 <sup>-01</sup> | 1.05 (0.81 - 1.37) | 6.93 X 10 <sup>-01</sup> |
| rs4765950  | 12 | 2481668 | CACNA1C | Intron | 0.99 | 3.83E-02 | A | G | 1.09 (0.65 - 1.81) | 7.45 X 10 <sup>-01</sup> | 0.94 (0.63 - 1.42) | 7.75 X 10 <sup>-01</sup> |
| rs2238086  | 12 | 2482502 | CACNA1C | Intron | 0.99 | 7.51E-01 | C | G | 0.56 (0.33 - 0.96) | 3.41 X 10 <sup>-02</sup> | 1.01 (0.62 - 1.64) | 9.66 X 10 <sup>-01</sup> |
| rs11608740 | 12 | 2483590 | CACNA1C | Intron | 0.98 | 6.87E-01 | A | G | 0.81 (0.58 - 1.15) | 2.36 X 10 <sup>-01</sup> | 0.93 (0.70 - 1.24) | 6.11 X 10 <sup>-01</sup> |
| rs2238087  | 12 | 2483977 | CACNA1C | Intron | 0.99 | 3.61E-01 | C | T | 0.87 (0.47 - 1.60) | 6.46 X 10 <sup>-01</sup> | 0.66 (0.40 - 1.09) | 1.02 X 10 <sup>-01</sup> |
| rs2239097  | 12 | 2489738 | CACNA1C | Intron | 0.98 | 7.99E-01 | C | T | 1.03 (0.74 - 1.43) | 8.73 X 10 <sup>-01</sup> | 1.09 (0.83 - 1.42) | 5.30 X 10 <sup>-01</sup> |
| rs2239105  | 12 | 2493926 | CACNA1C | Intron | 0.96 | 4.05E-01 | C | G | 1.26 (0.83 - 1.94) | 2.80 X 10 <sup>-01</sup> | 1.09 (0.78 - 1.52) | 6.14 X 10 <sup>-01</sup> |
| rs2239110  | 12 | 2499404 | CACNA1C | Intron | 0.98 | 2.84E-01 | A | G | 1.05 (0.66 - 1.67) | 8.49 X 10 <sup>-01</sup> | 0.93 (0.63 - 1.36) | 6.95 X 10 <sup>-01</sup> |
| rs4765951  | 12 | 2501832 | CACNA1C | Intron | 0.99 | 4.05E-01 | C | T | 0.96 (0.60 - 1.53) | 8.60 X 10 <sup>-01</sup> | 1.16 (0.78 - 1.72) | 4.68 X 10 <sup>-01</sup> |
| rs1990240  | 12 | 2509517 | CACNA1C | Intron | 0.98 | 2.40E-01 | A | G | 0.97 (0.68 - 1.38) | 8.50 X 10 <sup>-01</sup> | 1.08 (0.81 - 1.44) | 5.95 X 10 <sup>-01</sup> |
| rs4394887  | 12 | 2520241 | CACNA1C | Intron | 0.99 | 2.89E-01 | A | G | 0.97 (0.61 - 1.55) | 9.09 X 10 <sup>-01</sup> | 1.00 (0.68 - 1.47) | 9.91 X 10 <sup>-01</sup> |
| rs12304811 | 12 | 2529883 | CACNA1C | Intron | 0.98 | 3.82E-01 | A | G | 1.05 (0.73 - 1.51) | 7.98 X 10 <sup>-01</sup> | 1.10 (0.82 - 1.49) | 5.22 X 10 <sup>-01</sup> |
| rs929492   | 12 | 2540841 | CACNA1C | Intron | 0.98 | 6.29E-01 | C | T | 1.15 (0.75 - 1.76) | 5.16 X 10 <sup>-01</sup> | 1.21 (0.87 - 1.69) | 2.62 X 10 <sup>-01</sup> |
| rs2238090  | 12 | 2553593 | CACNA1C | Intron | 0.98 | 1.55E-01 | A | G | 0.90 (0.64 - 1.28) | 5.66 X 10 <sup>-01</sup> | 0.96 (0.73 - 1.26) | 7.63 X 10 <sup>-01</sup> |
| rs4765700  | 12 | 2555393 | CACNA1C | Intron | 0.97 | 4.77E-01 | A | C | 0.89 (0.60 - 1.32) | 5.51 X 10 <sup>-01</sup> | 0.89 (0.64 - 1.23) | 4.68 X 10 <sup>-01</sup> |
| rs7299658  | 12 | 2560524 | CACNA1C | Intron | 0.99 | 2.38E-01 | C | T | 0.96 (0.63 - 1.48) | 8.67 X 10 <sup>-01</sup> | 1.13 (0.79 - 1.62) | 4.97 X 10 <sup>-01</sup> |
| rs7311147  | 12 | 2578082 | CACNA1C | Intron | 0.98 | 4.50E-01 | A | G | 1.23 (0.87 - 1.72) | 2.37 X 10 <sup>-01</sup> | 1.17 (0.89 - 1.53) | 2.63 X 10 <sup>-01</sup> |
| rs758560   | 12 | 2585948 | CACNA1C | Intron | 0.99 | 8.84E-01 | A | G | 1.16 (0.69 - 1.94) | 5.71 X 10 <sup>-01</sup> | 1.20 (0.78 - 1.86) | 4.11 X 10 <sup>-01</sup> |
| rs216006   | 12 | 2590997 | CACNA1C | Intron | 0.98 | 6.94E-01 | C | T | 1.03 (0.69 - 1.53) | 8.96 X 10 <sup>-01</sup> | 1.07 (0.77 - 1.49) | 6.71 X 10 <sup>-01</sup> |
| rs2238092  | 12 | 2593527 | CACNA1C | Intron | 0.98 | 4.35E-01 | A | G | 1.29 (0.90 - 1.86) | 1.68 X 10 <sup>-01</sup> | 1.52 (1.12 - 2.06) | 7.03 X 10 <sup>-03</sup> |
| rs11609212 | 12 | 2593828 | CACNA1C | Intron | 0.99 | 5.73E-01 | A | C | 1.53 (0.84 - 2.79) | 1.62 X 10 <sup>-01</sup> | 1.62 (1.00 - 2.62) | 5.13 X 10 <sup>-02</sup> |
| rs216013   | 12 | 2599893 | CACNA1C | Intron | 0.97 | 2.78E-01 | A | G | 1.13 (0.74 - 1.73) | 5.81 X 10 <sup>-01</sup> | 1.25 (0.88 - 1.78) | 2.05 X 10 <sup>-01</sup> |
| rs1076390  | 12 | 2602980 | CACNA1C | Intron | 0.98 | 2.74E-01 | G | T | 1.13 (0.74 - 1.73) | 5.80 X 10 <sup>-01</sup> | 1.21 (0.85 - 1.72) | 2.89 X 10 <sup>-01</sup> |
| rs11062288 | 12 | 2612055 | CACNA1C | Intron | 0.98 | 3.91E-01 | C | T | 1.46 (1.03 - 2.09) | 3.57 X 10 <sup>-02</sup> | 1.53 (1.15 - 2.04) | 4.04 X 10 <sup>-03</sup> |
| rs11613210 | 12 | 2621573 | CACNA1C | Intron | 0.99 | 5.67E-01 | A | C | 1.09 (0.73 - 1.63) | 6.77 X 10 <sup>-01</sup> | 1.29 (0.92 - 1.80) | 1.40 X 10 <sup>-01</sup> |
| rs1420725  | 12 | 2621844 | CACNA1C | Intron | 0.98 | 5.69E-01 | C | G | 1.41 (0.98 - 2.02) | 6.33 X 10 <sup>-02</sup> | 1.41 (1.06 - 1.88) | 1.95 X 10 <sup>-02</sup> |
| rs216031   | 12 | 2627004 | CACNA1C | Intron | 0.98 | 9.45E-02 | C | T | 1.32 (0.91 - 1.91) | 1.41 X 10 <sup>-01</sup> | 1.39 (1.03 - 1.89) | 3.20 X 10 <sup>-02</sup> |
| rs12312322 | 12 | 2642067 | CACNA1C | Intron | 0.98 | 1.71E-01 | A | G | 1.36 (0.94 - 1.96) | 1.05 X 10 <sup>-01</sup> | 1.47 (1.08 - 2.01) | 1.33 X 10 <sup>-02</sup> |
| rs7295250  | 12 | 2647204 | CACNA1C | Intron | 0.98 | 1.17E-23 | C | T | 1.88 (1.30 - 2.71) | 7.62 X 10 <sup>-04</sup> | 1.56 (1.18 - 2.07) | 1.77 X 10 <sup>-03</sup> |
| rs7138079  | 12 | 2651565 | CACNA1C | Intron | 0.98 | 1.00E+00 | A | G | 1.29 (0.85 - 1.95) | 2.36 X 10 <sup>-01</sup> | 1.28 (0.92 - 1.77) | 1.46 X 10 <sup>-01</sup> |
| rs10431348 | 12 | 2654795 | CACNA1C | Intron | 0.99 | 5.69E-02 | A | G | 1.56 (1.00 - 2.45) | 5.11 X 10 <sup>-02</sup> | 1.33 (0.93 - 1.89) | 1.16 X 10 <sup>-01</sup> |

|            |    |          |         |            |      |          |   |   |                    |                          |                    |                          |
|------------|----|----------|---------|------------|------|----------|---|---|--------------------|--------------------------|--------------------|--------------------------|
| rs12229387 | 12 | 2700769  | CACNA1C |            | 0.97 | 5.64E-01 | A | G | 1.25 (0.89 - 1.74) | 1.97 X 10 <sup>-01</sup> | 0.96 (0.74 - 1.26) | 7.80 X 10 <sup>-01</sup> |
| rs12813281 | 12 | 2701640  | CACNA1C |            | 0.94 | 1.00E+00 | A | G | 1.07 (0.68 - 1.66) | 7.76 X 10 <sup>-01</sup> | 0.82 (0.58 - 1.14) | 2.40 X 10 <sup>-01</sup> |
| rs12818377 | 12 | 2702260  | CACNA1C |            | 0.98 | 6.91E-01 | C | T | 1.31 (0.79 - 2.15) | 2.93 X 10 <sup>-01</sup> | 0.85 (0.58 - 1.24) | 4.02 X 10 <sup>-01</sup> |
| rs11062335 | 12 | 2711853  | CACNA1C |            | 0.99 | 5.89E-01 | C | T | 1.08 (0.69 - 1.70) | 7.38 X 10 <sup>-01</sup> | 0.94 (0.64 - 1.37) | 7.36 X 10 <sup>-01</sup> |
| rs7973927  | 12 | 2725071  | CACNA1C |            | 0.98 | 3.15E-01 | C | T | 1.27 (0.89 - 1.82) | 1.82 X 10 <sup>-01</sup> | 0.97 (0.74 - 1.29) | 8.56 X 10 <sup>-01</sup> |
| rs4238007  | 12 | 2731123  | CACNA1C |            | 0.99 | 2.21E-01 | A | T | 0.97 (0.60 - 1.58) | 9.08 X 10 <sup>-01</sup> | 0.80 (0.55 - 1.16) | 2.32 X 10 <sup>-01</sup> |
| rs4313632  | 12 | 2746897  | CACNA1C |            | 0.98 | 3.92E-01 | A | G | 1.09 (0.74 - 1.62) | 6.55 X 10 <sup>-01</sup> | 0.91 (0.66 - 1.24) | 5.41 X 10 <sup>-01</sup> |
| rs10848703 | 12 | 2752511  | CACNA1C |            | 0.98 | 4.97E-01 | A | G | 0.82 (0.58 - 1.17) | 2.81 X 10 <sup>-01</sup> | 1.00 (0.75 - 1.34) | 9.85 X 10 <sup>-01</sup> |
| rs4075718  | 12 | 2754569  | CACNA1C |            | 0.97 | 6.66E-01 | C | T | 0.79 (0.55 - 1.14) | 2.07 X 10 <sup>-01</sup> | 1.13 (0.82 - 1.54) | 4.57 X 10 <sup>-01</sup> |
| rs4073984  | 12 | 2756041  | CACNA1C |            | 0.99 | 5.44E-03 | A | G | 0.84 (0.62 - 1.16) | 2.91 X 10 <sup>-01</sup> | 0.99 (0.76 - 1.29) | 9.37 X 10 <sup>-01</sup> |
| rs4409904  | 12 | 2756390  | CACNA1C |            | 0.98 | 4.45E-01 | C | T | 1.01 (0.62 - 1.65) | 9.61 X 10 <sup>-01</sup> | 0.98 (0.66 - 1.45) | 9.17 X 10 <sup>-01</sup> |
| rs4073426  | 12 | 2756560  | CACNA1C |            | 0.99 | 2.77E-01 | A | G | 0.81 (0.55 - 1.20) | 2.93 X 10 <sup>-01</sup> | 1.01 (0.73 - 1.41) | 9.41 X 10 <sup>-01</sup> |
| rs12823126 | 12 | 2757207  | CACNA1C |            | 0.98 | 1.92E-01 | A | C | 0.76 (0.53 - 1.08) | 1.27 X 10 <sup>-01</sup> | 1.04 (0.77 - 1.41) | 7.99 X 10 <sup>-01</sup> |
| rs4765998  | 12 | 2807274  | CACNA1C | Intron     | 0.98 | 6.91E-01 | C | G | 1.00 (0.68 - 1.47) | 9.86 X 10 <sup>-01</sup> | 1.01 (0.74 - 1.37) | 9.71 X 10 <sup>-01</sup> |
| rs11613945 | 12 | 2809672  | CACNA1C | Intron     | 0.98 | 4.33E-01 | A | G | 1.04 (0.66 - 1.64) | 8.73 X 10 <sup>-01</sup> | 1.10 (0.76 - 1.57) | 6.21 X 10 <sup>-01</sup> |
| rs17834697 | 12 | 2811887  | CACNA1C | Intron     | 0.98 | 1.18E-01 | A | G | 1.25 (0.67 - 2.30) | 4.84 X 10 <sup>-01</sup> | 1.01 (0.63 - 1.61) | 9.79 X 10 <sup>-01</sup> |
| rs11611125 | 12 | 2815647  | CACNA1C | Promoter   | 0.99 | 2.01E-01 | C | G | 0.96 (0.66 - 1.40) | 8.30 X 10 <sup>-01</sup> | 1.17 (0.86 - 1.59) | 3.26 X 10 <sup>-01</sup> |
| rs11062373 | 12 | 2815908  | CACNA1C | Promoter   | 0.99 | 6.56E-01 | A | C | 0.94 (0.65 - 1.38) | 7.57 X 10 <sup>-01</sup> | 1.01 (0.74 - 1.38) | 9.36 X 10 <sup>-01</sup> |
| rs2074159  | 17 | 37510024 | KCNJ4   | Intron     | 0.99 | 2.49E-01 | A | G | 0.69 (0.43 - 1.11) | 1.28 X 10 <sup>-01</sup> | 0.97 (0.64 - 1.48) | 8.85 X 10 <sup>-01</sup> |
| rs12600570 | 17 | 37515071 | KCNJ4   | Intron     | 0.99 | 7.21E-01 | C | T | 0.83 (0.51 - 1.37) | 4.70 X 10 <sup>-01</sup> | 1.05 (0.69 - 1.60) | 8.24 X 10 <sup>-01</sup> |
| rs11079033 | 17 | 37515998 | KCNJ4   | Intron     | 0.98 | 3.01E-02 | A | G | 1.07 (0.73 - 1.58) | 7.23 X 10 <sup>-01</sup> | 1.31 (0.95 - 1.82) | 1.03 X 10 <sup>-01</sup> |
| rs2883233  | 17 | 37540353 | KCNJ4   | Intron     | 0.97 | 3.38E-02 | C | G | 0.98 (0.66 - 1.47) | 9.30 X 10 <sup>-01</sup> | 0.81 (0.59 - 1.13) | 2.16 X 10 <sup>-01</sup> |
| rs9903204  | 17 | 37541588 | KCNJ4   | Intron     | 0.98 | 3.89E-02 | A | G | 0.88 (0.61 - 1.25) | 4.69 X 10 <sup>-01</sup> | 1.05 (0.78 - 1.42) | 7.37 X 10 <sup>-01</sup> |
| rs11079035 | 17 | 37542538 | KCNJ4   | Intron     | 0.99 | 8.50E-02 | A | G | 0.85 (0.56 - 1.29) | 4.55 X 10 <sup>-01</sup> | 0.94 (0.67 - 1.31) | 6.97 X 10 <sup>-01</sup> |
| rs9900213  | 17 | 37629407 | KCNJ4   | Intron     | 0.99 | 4.50E-01 | G | T | 0.83 (0.55 - 1.26) | 3.86 X 10 <sup>-01</sup> | 1.20 (0.85 - 1.70) | 2.93 X 10 <sup>-01</sup> |
| rs8064638  | 17 | 37677781 | KCNJ4   | Intron     | 0.99 | 4.64E-01 | A | G | 1.11 (0.78 - 1.57) | 5.76 X 10 <sup>-01</sup> | 1.25 (0.94 - 1.66) | 1.25 X 10 <sup>-01</sup> |
| rs8069687  | 17 | 59236755 | SCN4A   | Intron     | 0.98 | 5.58E-01 | A | G | 0.72 (0.50 - 1.04) | 7.90 X 10 <sup>-02</sup> | 0.89 (0.66 - 1.19) | 4.17 X 10 <sup>-01</sup> |
| rs17638873 | 17 | 59247808 | SCN4A   | Downstream | 0.98 | 3.62E-01 | C | T | 0.78 (0.48 - 1.28) | 3.31 X 10 <sup>-01</sup> | 0.87 (0.59 - 1.28) | 4.80 X 10 <sup>-01</sup> |
| rs1062787  | 17 | 59249736 | SCN4A   | Downstream | 0.99 | 2.66E-26 | C | T | 0.96 (0.64 - 1.44) | 8.47 X 10 <sup>-01</sup> | 1.05 (0.76 - 1.45) | 7.79 X 10 <sup>-01</sup> |
| rs2008018  | 17 | 59308203 | SCN4A   | Downstream | 0.98 | 9.56E-01 | C | T | 1.34 (0.94 - 1.91) | 1.11 X 10 <sup>-01</sup> | 1.05 (0.81 - 1.37) | 7.09 X 10 <sup>-01</sup> |
| rs2854184  | 17 | 59351725 | SCN4A   | Promoter   | 0.98 | 4.97E-02 | A | T | 1.03 (0.75 - 1.42) | 8.44 X 10 <sup>-01</sup> | 0.94 (0.72 - 1.23) | 6.55 X 10 <sup>-01</sup> |
| rs2070776  | 17 | 59361230 | SCN4A   | Intron     | 0.99 | 1.00E+00 | C | T | 1.29 (0.92 - 1.82) | 1.41 X 10 <sup>-01</sup> | 1.13 (0.86 - 1.48) | 3.70 X 10 <sup>-01</sup> |
| rs2003549  | 17 | 59362169 | SCN4A   | Intron     | 0.99 | 8.04E-01 | A | G | 0.76 (0.52 - 1.10) | 1.48 X 10 <sup>-01</sup> | 0.92 (0.68 - 1.25) | 6.10 X 10 <sup>-01</sup> |
| rs2070720  | 17 | 59372505 | SCN4A   | Promoter   | 0.98 | 4.32E-01 | A | G | 1.02 (0.74 - 1.42) | 8.85 X 10 <sup>-01</sup> | 1.04 (0.79 - 1.37) | 7.60 X 10 <sup>-01</sup> |
| rs2058194  | 17 | 59374080 | SCN4A   | Exon       | 0.99 | 6.97E-01 | C | T | 1.07 (0.77 - 1.48) | 6.94 X 10 <sup>-01</sup> | 0.98 (0.76 - 1.27) | 8.79 X 10 <sup>-01</sup> |
| rs3785568  | 17 | 59377523 | SCN4A   | Intron     | 0.94 | 2.45E-04 | A | G | 1.06 (0.70 - 1.58) | 7.97 X 10 <sup>-01</sup> | 1.08 (0.78 - 1.50) | 6.33 X 10 <sup>-01</sup> |
| rs8080613  | 17 | 59383963 | SCN4A   | Intron     | 0.98 | 3.45E-01 | A | T | 0.86 (0.61 - 1.20) | 3.66 X 10 <sup>-01</sup> | 1.06 (0.81 - 1.39) | 6.65 X 10 <sup>-01</sup> |
| rs4968679  | 17 | 59400473 | SCN4A   | Intron     | 0.97 | 1.58E-01 | A | T | 1.19 (0.86 - 1.66) | 2.95 X 10 <sup>-01</sup> | 1.04 (0.80 - 1.35) | 7.55 X 10 <sup>-01</sup> |
| rs2302237  | 17 | 59402439 | SCN4A   | Intron     | 0.98 | 2.21E-01 | C | T | 0.87 (0.62 - 1.22) | 4.20 X 10 <sup>-01</sup> | 0.93 (0.71 - 1.22) | 5.97 X 10 <sup>-01</sup> |
| rs2041277  | 17 | 59410101 | SCN4A   | Promoter   | 0.99 | 6.04E-01 | A | T | 0.80 (0.47 - 1.34) | 3.92 X 10 <sup>-01</sup> | 1.11 (0.71 - 1.73) | 6.63 X 10 <sup>-01</sup> |
| rs735621   | 17 | 59414450 | SCN4A   |            | 0.98 | 4.82E-01 | G | T | 0.93 (0.67 - 1.30) | 6.88 X 10 <sup>-01</sup> | 1.09 (0.83 - 1.43) | 5.44 X 10 <sup>-01</sup> |
| rs11653059 | 17 | 59421085 | SCN4A   |            | 0.97 | 3.69E-01 | A | G | 0.93 (0.67 - 1.29) | 6.74 X 10 <sup>-01</sup> | 1.10 (0.84 - 1.43) | 5.08 X 10 <sup>-01</sup> |
| rs4968681  | 17 | 59423885 | SCN4A   | Downstream | 0.98 | 1.14E-01 | A | G | 0.97 (0.70 - 1.35) | 8.52 X 10 <sup>-01</sup> | 1.04 (0.79 - 1.36) | 7.79 X 10 <sup>-01</sup> |
| rs11655833 | 17 | 59436944 | SCN4A   | Intron     | 0.99 | 8.71E-01 | A | T | 0.49 (0.26 - 0.92) | 2.76 X 10 <sup>-02</sup> | 0.67 (0.40 - 1.14) | 1.36 X 10 <sup>-01</sup> |
| rs4968691  | 17 | 59458712 | SCN4A   |            | 0.98 | 5.26E-01 | A | G | 0.81 (0.57 - 1.14) | 2.21 X 10 <sup>-01</sup> | 0.92 (0.70 - 1.22) | 5.76 X 10 <sup>-01</sup> |
| rs17688326 | 17 | 59462855 | SCN4A   |            | 0.98 | 5.08E-01 | C | T | 0.73 (0.51 - 1.05) | 9.04 X 10 <sup>-02</sup> | 0.75 (0.56 - 1.00) | 5.28 X 10 <sup>-02</sup> |
| rs1985961  | 17 | 59470994 | SCN4A   | Downstream | 0.99 | 7.62E-01 | C | T | 1.13 (0.82 - 1.56) | 4.68 X 10 <sup>-01</sup> | 1.44 (1.10 - 1.89) | 7.85 X 10 <sup>-03</sup> |
| rs2021746  | 17 | 59487220 | SCN4A   | Intron     | 0.99 | 7.83E-03 | A | T | 1.22 (0.75 - 1.97) | 4.24 X 10 <sup>-01</sup> | 1.34 (0.90 - 2.00) | 1.55 X 10 <sup>-01</sup> |
| rs7220928  | 17 | 59496712 | SCN4A   | Intron     | 0.99 | 8.70E-01 | A | G | 1.09 (0.61 - 1.95) | 7.66 X 10 <sup>-01</sup> | 1.23 (0.77 - 1.95) | 3.85 X 10 <sup>-01</sup> |
| rs9902949  | 17 | 65612300 | KCNJ2   | Intron     | 0.99 | 7.11E-01 | A | C | 1.22 (0.78 - 1.90) | 3.84 X 10 <sup>-01</sup> | 1.22 (0.86 - 1.72) | 2.60 X 10 <sup>-01</sup> |
| rs9890060  | 17 | 65613926 | KCNJ2   | Intron     | 0.97 | 9.57E-01 | C | T | 0.92 (0.66 - 1.28) | 6.23 X 10 <sup>-01</sup> | 1.30 (0.99 - 1.72) | 6.01 X 10 <sup>-02</sup> |
| rs874690   | 17 | 65614211 | KCNJ2   | Intron     | 0.99 | 4.90E-03 | A | C | 0.91 (0.63 - 1.33) | 6.29 X 10 <sup>-01</sup> | 0.94 (0.68 - 1.28) | 6.83 X 10 <sup>-01</sup> |
| rs4968796  | 17 | 65614942 | KCNJ2   | Intron     | 0.97 | 5.25E-01 | C | T | 1.06 (0.77 - 1.46) | 7.17 X 10 <sup>-01</sup> | 0.96 (0.74 - 1.26) | 7.88 X 10 <sup>-01</sup> |
| rs7212694  | 17 | 65618511 | KCNJ2   | Intron     | 0.98 | 1.96E-02 | A | G | 0.82 (0.46 - 1.45) | 4.86 X 10 <sup>-01</sup> | 0.94 (0.58 - 1.53) | 8.02 X 10 <sup>-01</sup> |
| rs3785902  | 17 | 65619713 | KCNJ2   | Intron     | 0.97 | 3.97E-01 | C | G | 0.86 (0.59 - 1.26) | 4.43 X 10 <sup>-01</sup> | 0.98 (0.73 - 1.32) | 9.06 X 10 <sup>-01</sup> |
| rs12936361 | 17 | 65620012 | KCNJ2   | Intron     | 0.97 | 7.27E-01 | C | T | 0.95 (0.60 - 1.51) | 8.30 X 10 <sup>-01</sup> | 0.85 (0.59 - 1.23) | 3.84 X 10 <sup>-01</sup> |
| rs8079768  | 17 | 65626554 | KCNJ2   | Intron     | 0.99 | 8.06E-01 | C | T | 0.89 (0.60 - 1.33) | 5.81 X 10 <sup>-01</sup> | 1.26 (0.91 - 1.76) | 1.68 X 10 <sup>-01</sup> |
| rs9897311  | 17 | 65628690 | KCNJ2   | Intron     | 0.99 | 9.32E-01 | C | T | 0.90 (0.60 - 1.35) | 6.03 X 10 <sup>-01</sup> | 1.24 (0.89 - 1.73) | 2.09 X 10 <sup>-01</sup> |
| rs9897584  | 17 | 65628828 | KCNJ2   | Intron     | 0.97 | 5.10E-01 | C | G | 0.86 (0.60 - 1.24) | 4.11 X 10 <sup>-01</sup> | 1.07 (0.79 - 1.44) | 6.74 X 10 <sup>-01</sup> |
| rs17775002 | 17 | 65630395 | KCNJ2   | Intron     | 0.99 | 1.00E+00 | G | T | 1.29 (0.78 - 2.16) | 3.22 X 10 <sup>-01</sup> | 1.05 (0.70 - 1.59) | 8.08 X 10 <sup>-01</sup> |
| rs8078612  | 17 | 65631746 | KCNJ2   | Intron     | 0.92 | 7.03E-01 | C | T | 0.77 (0.47 - 1.25) | 2.88 X 10 <sup>-01</sup> | 0.81 (0.55 - 1.20) | 2.86 X 10 <sup>-01</sup> |
| rs12943869 | 17 | 65632401 | KCNJ2   | Intron     | 0.98 | 6.82E-01 | A | G | 0.70 (0.49 - 1.01) | 5.37 X 10 <sup>-02</sup> | 0.95 (0.71 - 1.26) | 7.01 X 10 <sup>-01</sup> |
| rs2366489  | 17 | 65645359 | KCNJ2   | Downstream | 0.99 | 6.59E-01 | C | T | 0.67 (0.42 - 1.06) | 8.66 X 10 <sup>-02</sup> | 1.08 (0.73 - 1.61) | 7.00 X 10 <sup>-01</sup> |
| rs4497742  | 17 | 65647472 | KCNJ2   | Downstream | 0.99 | 4.45E-01 | A | G | 0.81 (0.59 - 1.12) | 1.95 X 10 <sup>-01</sup> | 0.99 (0.76 - 1.30) | 9.59 X 10 <sup>-01</sup> |

|            |    |          |       |            |      |          |   |   |                    |                          |                    |                          |
|------------|----|----------|-------|------------|------|----------|---|---|--------------------|--------------------------|--------------------|--------------------------|
| rs16975251 | 17 | 65648762 | KCNJ2 | Downstream | 0.97 | 3.73E-01 | A | G | 1.10 (0.74 - 1.62) | 6.45 X 10 <sup>-01</sup> | 0.87 (0.64 - 1.18) | 3.66 X 10 <sup>-01</sup> |
| rs4328485  | 17 | 65689360 | KCNJ2 | Downstream | 0.98 | 1.04E-01 | A | C | 0.76 (0.55 - 1.05) | 9.06 X 10 <sup>-02</sup> | 0.91 (0.70 - 1.18) | 4.65 X 10 <sup>-01</sup> |
| rs9906310  | 17 | 65691069 | KCNJ2 | Downstream | 0.97 | 4.22E-01 | C | T | 1.05 (0.75 - 1.46) | 7.74 X 10 <sup>-01</sup> | 1.02 (0.78 - 1.34) | 8.70 X 10 <sup>-01</sup> |
| rs236519   | 17 | 65691381 | KCNJ2 | Downstream | 0.97 | 6.15E-01 | C | T | 1.07 (0.77 - 1.50) | 6.82 X 10 <sup>-01</sup> | 1.22 (0.92 - 1.61) | 1.72 X 10 <sup>-01</sup> |
| rs12949668 | 17 | 65694454 | KCNJ2 | Downstream | 0.98 | 8.70E-01 | C | G | 1.03 (0.74 - 1.45) | 8.47 X 10 <sup>-01</sup> | 0.92 (0.70 - 1.22) | 5.77 X 10 <sup>-01</sup> |
| rs9901104  | 17 | 65694862 | KCNJ2 | Downstream | 0.99 | 2.82E-01 | C | G | 1.34 (0.84 - 2.15) | 2.24 X 10 <sup>-01</sup> | 1.36 (0.93 - 1.97) | 1.10 X 10 <sup>-01</sup> |
| rs236578   | 17 | 65705857 | KCNJ2 |            | 0.99 | 3.38E-01 | C | T | 0.80 (0.51 - 1.25) | 3.23 X 10 <sup>-01</sup> | 1.10 (0.76 - 1.59) | 5.99 X 10 <sup>-01</sup> |
| rs1514239  | 17 | 65707640 | KCNJ2 |            | 0.96 | 4.37E-03 | C | T | 1.23 (0.85 - 1.78) | 2.74 X 10 <sup>-01</sup> | 1.05 (0.78 - 1.41) | 7.69 X 10 <sup>-01</sup> |
| rs10512537 | 17 | 65710728 | KCNJ2 |            | 0.98 | 1.00E+00 | C | G | 0.72 (0.44 - 1.20) | 2.13 X 10 <sup>-01</sup> | 0.90 (0.59 - 1.38) | 6.28 X 10 <sup>-01</sup> |
| rs236584   | 17 | 65712875 | KCNJ2 |            | 0.98 | 2.52E-01 | A | G | 1.18 (0.76 - 1.84) | 4.67 X 10 <sup>-01</sup> | 1.04 (0.75 - 1.45) | 7.98 X 10 <sup>-01</sup> |
| rs1468473  | 17 | 65712954 | KCNJ2 |            | 0.98 | 5.95E-01 | C | T | 0.85 (0.60 - 1.21) | 3.75 X 10 <sup>-01</sup> | 1.23 (0.93 - 1.63) | 1.55 X 10 <sup>-01</sup> |
| rs236585   | 17 | 65714108 | KCNJ2 |            | 0.98 | 3.06E-01 | C | T | 0.74 (0.53 - 1.03) | 7.45 X 10 <sup>-02</sup> | 0.88 (0.68 - 1.15) | 3.52 X 10 <sup>-01</sup> |
| rs236586   | 17 | 65715141 | KCNJ2 |            | 0.98 | 1.00E+00 | A | G | 1.25 (0.90 - 1.74) | 1.83 X 10 <sup>-01</sup> | 1.16 (0.90 - 1.51) | 2.58 X 10 <sup>-01</sup> |
| rs236587   | 17 | 65715510 | KCNJ2 |            | 0.99 | 1.00E+00 | C | T | 0.72 (0.48 - 1.06) | 9.17 X 10 <sup>-02</sup> | 0.90 (0.66 - 1.22) | 4.85 X 10 <sup>-01</sup> |
| rs236588   | 17 | 65716189 | KCNJ2 |            | 0.98 | 4.21E-01 | A | T | 1.21 (0.85 - 1.71) | 2.94 X 10 <sup>-01</sup> | 0.98 (0.74 - 1.29) | 8.64 X 10 <sup>-01</sup> |
| rs236594   | 17 | 65719222 | KCNJ2 |            | 0.98 | 2.52E-01 | A | G | 0.89 (0.64 - 1.25) | 5.06 X 10 <sup>-01</sup> | 1.00 (0.76 - 1.32) | 9.89 X 10 <sup>-01</sup> |
| rs8076345  | 17 | 65724145 | KCNJ2 |            | 0.98 | 6.70E-01 | A | G | 1.01 (0.65 - 1.56) | 9.66 X 10 <sup>-01</sup> | 0.92 (0.64 - 1.31) | 6.34 X 10 <sup>-01</sup> |
| rs236524   | 17 | 65725094 | KCNJ2 |            | 0.98 | 8.20E-01 | C | T | 0.69 (0.48 - 0.98) | 3.81 X 10 <sup>-02</sup> | 0.90 (0.68 - 1.19) | 4.52 X 10 <sup>-01</sup> |
| rs236528   | 17 | 65727185 | KCNJ2 |            | 0.97 | 8.84E-01 | A | G | 0.78 (0.56 - 1.08) | 1.34 X 10 <sup>-01</sup> | 1.03 (0.79 - 1.34) | 8.36 X 10 <sup>-01</sup> |
| rs638538   | 17 | 65727723 | KCNJ2 |            | 0.99 | 4.56E-01 | A | C | 0.83 (0.57 - 1.21) | 3.37 X 10 <sup>-01</sup> | 1.05 (0.77 - 1.41) | 7.72 X 10 <sup>-01</sup> |
| rs236531   | 17 | 65729455 | KCNJ2 |            | 0.98 | 4.28E-01 | A | G | 0.84 (0.59 - 1.18) | 3.08 X 10 <sup>-01</sup> | 0.98 (0.75 - 1.28) | 8.70 X 10 <sup>-01</sup> |
| rs189323   | 17 | 65733612 | KCNJ2 |            | 0.98 | 3.71E-01 | A | G | 1.07 (0.74 - 1.54) | 7.31 X 10 <sup>-01</sup> | 0.92 (0.69 - 1.22) | 5.52 X 10 <sup>-01</sup> |
| rs12150382 | 17 | 65734367 | KCNJ2 |            | 0.98 | 8.96E-01 | A | G | 1.05 (0.72 - 1.52) | 8.04 X 10 <sup>-01</sup> | 0.94 (0.69 - 1.28) | 6.94 X 10 <sup>-01</sup> |
| rs9896666  | 17 | 65737916 | KCNJ2 |            | 0.99 | 9.09E-01 | C | T | 1.08 (0.77 - 1.53) | 6.50 X 10 <sup>-01</sup> | 1.10 (0.83 - 1.46) | 5.20 X 10 <sup>-01</sup> |
| rs236565   | 17 | 65749184 | KCNJ2 |            | 0.98 | 8.83E-01 | C | T | 0.67 (0.46 - 0.99) | 4.49 X 10 <sup>-02</sup> | 0.94 (0.68 - 1.31) | 7.27 X 10 <sup>-01</sup> |
| rs4538053  | 17 | 65759060 | KCNJ2 |            | 0.99 | 6.77E-01 | C | G | 1.17 (0.77 - 1.77) | 4.63 X 10 <sup>-01</sup> | 1.21 (0.87 - 1.68) | 2.64 X 10 <sup>-01</sup> |
| rs236558   | 17 | 65762031 | KCNJ2 |            | 0.99 | 9.61E-01 | C | T | 1.11 (0.81 - 1.53) | 5.22 X 10 <sup>-01</sup> | 0.93 (0.71 - 1.21) | 5.80 X 10 <sup>-01</sup> |
| rs1063235  | 19 | 40140643 | SCN1B | 3'UTR      | 0.98 | 8.84E-01 | G | T | 1.06 (0.78 - 1.45) | 7.07 X 10 <sup>-01</sup> | 1.09 (0.84 - 1.42) | 5.16 X 10 <sup>-01</sup> |
| rs2546027  | 19 | 40146055 | SCN1B | Promoter   | 0.98 | 6.98E-01 | G | T | 0.94 (0.69 - 1.29) | 7.13 X 10 <sup>-01</sup> | 1.07 (0.83 - 1.38) | 5.90 X 10 <sup>-01</sup> |
| rs7257107  | 19 | 40154669 | SCN1B |            | 0.99 | 2.44E-01 | C | T | 0.90 (0.64 - 1.27) | 5.58 X 10 <sup>-01</sup> | 1.02 (0.78 - 1.33) | 8.88 X 10 <sup>-01</sup> |
| rs888860   | 19 | 40157027 | SCN1B |            | 0.99 | 8.71E-01 | A | C | 0.88 (0.63 - 1.23) | 4.47 X 10 <sup>-01</sup> | 1.04 (0.79 - 1.36) | 7.84 X 10 <sup>-01</sup> |
| rs1862274  | 19 | 40157737 | SCN1B |            | 0.98 | 1.00E+00 | A | G | 0.88 (0.63 - 1.23) | 4.56 X 10 <sup>-01</sup> | 0.99 (0.76 - 1.29) | 9.39 X 10 <sup>-01</sup> |
| rs786506   | 19 | 40171753 | SCN1B |            | 0.98 | 6.48E-01 | A | G | 0.91 (0.62 - 1.33) | 6.29 X 10 <sup>-01</sup> | 0.92 (0.68 - 1.26) | 6.05 X 10 <sup>-01</sup> |
| rs8105140  | 19 | 40182107 | SCN1B | Promoter   | 0.99 | 8.87E-01 | C | G | 1.60 (0.90 - 2.85) | 1.11 X 10 <sup>-01</sup> | 1.04 (0.67 - 1.61) | 8.60 X 10 <sup>-01</sup> |
| rs8113650  | 19 | 40189466 | SCN1B | Intron     | 0.98 | 7.28E-01 | A | G | 1.31 (0.92 - 1.86) | 1.36 X 10 <sup>-01</sup> | 0.89 (0.68 - 1.15) | 3.71 X 10 <sup>-01</sup> |
| rs2290644  | 19 | 40204982 | SCN1B | Intron     | 0.98 | 9.27E-01 | C | G | 1.19 (0.77 - 1.85) | 4.35 X 10 <sup>-01</sup> | 0.95 (0.67 - 1.35) | 7.70 X 10 <sup>-01</sup> |
| rs8100085  | 19 | 40214959 | SCN1B | Intron     | 0.98 | 1.20E-01 | A | T | 1.40 (0.97 - 2.01) | 7.14 X 10 <sup>-02</sup> | 0.87 (0.66 - 1.15) | 3.17 X 10 <sup>-01</sup> |
| rs8107142  | 19 | 40228204 | SCN1B | Intron     | 0.97 | 6.78E-02 | A | G | 1.42 (0.86 - 2.32) | 1.67 X 10 <sup>-01</sup> | 1.37 (0.92 - 2.03) | 1.17 X 10 <sup>-01</sup> |
| rs870379   | 19 | 40235596 | SCN1B | Intron     | 0.99 | 1.36E-01 | C | T | 0.74 (0.53 - 1.05) | 8.93 X 10 <sup>-02</sup> | 0.95 (0.72 - 1.26) | 7.39 X 10 <sup>-01</sup> |
| rs2451996  | 19 | 40236803 | SCN1B | Intron     | 0.99 | 1.04E-01 | A | T | 0.77 (0.56 - 1.06) | 1.09 X 10 <sup>-01</sup> | 0.97 (0.74 - 1.25) | 7.90 X 10 <sup>-01</sup> |
| rs1688029  | 19 | 40249280 | SCN1B | 3'UTR      | 0.98 | 1.10E-03 | C | G | 0.84 (0.60 - 1.16) | 2.90 X 10 <sup>-01</sup> | 1.09 (0.83 - 1.44) | 5.32 X 10 <sup>-01</sup> |
| rs11671010 | 19 | 40251314 | SCN1B | Downstream | 0.97 | 8.54E-04 | C | T | 0.75 (0.50 - 1.14) | 1.75 X 10 <sup>-01</sup> | 1.07 (0.75 - 1.54) | 7.04 X 10 <sup>-01</sup> |
| rs8103371  | 19 | 40256847 | SCN1B | Downstream | 0.98 | 5.70E-01 | C | T | 2.06 (1.28 - 3.32) | 2.98 X 10 <sup>-03</sup> | 1.53 (1.06 - 2.21) | 2.43 X 10 <sup>-02</sup> |
| rs1687983  | 19 | 40260052 | SCN1B |            | 0.99 | 1.32E-01 | C | T | 1.14 (0.78 - 1.68) | 5.00 X 10 <sup>-01</sup> | 1.07 (0.78 - 1.45) | 6.88 X 10 <sup>-01</sup> |
| rs8104768  | 19 | 40261219 | SCN1B |            | 0.94 | 1.32E-01 | A | G | 0.74 (0.47 - 1.17) | 1.97 X 10 <sup>-01</sup> | 1.02 (0.71 - 1.49) | 9.01 X 10 <sup>-01</sup> |
| rs1687982  | 19 | 40262147 | SCN1B |            | 0.98 | 8.84E-01 | C | G | 1.15 (0.84 - 1.58) | 3.88 X 10 <sup>-01</sup> | 0.96 (0.75 - 1.24) | 7.64 X 10 <sup>-01</sup> |
| rs8112275  | 19 | 40262775 | SCN1B |            | 0.98 | 6.88E-01 | C | G | 1.10 (0.69 - 1.73) | 6.99 X 10 <sup>-01</sup> | 1.16 (0.80 - 1.68) | 4.34 X 10 <sup>-01</sup> |
| rs4806077  | 19 | 40269003 | SCN1B |            | 0.98 | 1.73E-01 | C | T | 0.87 (0.57 - 1.33) | 5.29 X 10 <sup>-01</sup> | 0.80 (0.57 - 1.12) | 1.98 X 10 <sup>-01</sup> |
| rs7250814  | 19 | 40269710 | SCN1B |            | 0.99 | 8.82E-01 | A | G | 0.68 (0.49 - 0.94) | 2.10 X 10 <sup>-02</sup> | 0.79 (0.61 - 1.03) | 8.08 X 10 <sup>-02</sup> |
| rs17718894 | 19 | 40269895 | SCN1B |            | 0.98 | 2.01E-01 | A | G | 1.33 (0.94 - 1.88) | 1.11 X 10 <sup>-01</sup> | 1.12 (0.85 - 1.47) | 4.10 X 10 <sup>-01</sup> |
| rs8134775  | 21 | 34513696 | KCNE2 |            | 0.98 | 1.95E-03 | C | T | 1.10 (0.74 - 1.64) | 6.48 X 10 <sup>-01</sup> | 1.07 (0.78 - 1.46) | 6.82 X 10 <sup>-01</sup> |
| rs2834412  | 21 | 34514668 | KCNE2 |            | 0.98 | 6.63E-01 | A | T | 1.11 (0.72 - 1.71) | 6.43 X 10 <sup>-01</sup> | 1.05 (0.74 - 1.49) | 7.96 X 10 <sup>-01</sup> |
| rs9305545  | 21 | 34517691 | KCNE2 |            | 0.98 | 8.42E-02 | A | G | 0.78 (0.51 - 1.19) | 2.46 X 10 <sup>-01</sup> | 0.88 (0.60 - 1.29) | 5.13 X 10 <sup>-01</sup> |
| rs4816474  | 21 | 34520489 | KCNE2 |            | 0.97 | 8.81E-01 | A | G | 1.05 (0.76 - 1.46) | 7.62 X 10 <sup>-01</sup> | 0.97 (0.75 - 1.27) | 8.39 X 10 <sup>-01</sup> |
| rs2834416  | 21 | 34523168 | KCNE2 |            | 0.98 | 2.11E-01 | C | T | 0.97 (0.69 - 1.37) | 8.60 X 10 <sup>-01</sup> | 1.17 (0.87 - 1.56) | 2.96 X 10 <sup>-01</sup> |
| rs2834417  | 21 | 34525032 | KCNE2 |            | 0.97 | 9.19E-01 | C | T | 1.22 (0.88 - 1.70) | 2.30 X 10 <sup>-01</sup> | 0.99 (0.76 - 1.29) | 9.27 X 10 <sup>-01</sup> |
| rs8131284  | 21 | 34529366 | KCNE2 |            | 0.98 | 5.30E-01 | C | T | 1.16 (0.74 - 1.81) | 5.31 X 10 <sup>-01</sup> | 1.33 (0.91 - 1.93) | 1.40 X 10 <sup>-01</sup> |
| rs743338   | 21 | 34539518 | KCNE2 |            | 0.99 | 1.78E-01 | A | G | 0.90 (0.65 - 1.25) | 5.24 X 10 <sup>-01</sup> | 1.07 (0.82 - 1.41) | 6.02 X 10 <sup>-01</sup> |
| rs2834424  | 21 | 34547621 | KCNE2 |            | 0.99 | 9.23E-01 | A | T | 0.81 (0.52 - 1.26) | 3.41 X 10 <sup>-01</sup> | 0.81 (0.56 - 1.17) | 2.59 X 10 <sup>-01</sup> |
| rs2834425  | 21 | 34550748 | KCNE2 |            | 0.97 | 5.37E-01 | A | G | 0.90 (0.64 - 1.26) | 5.35 X 10 <sup>-01</sup> | 1.06 (0.80 - 1.40) | 6.82 X 10 <sup>-01</sup> |
| rs2834432  | 21 | 34566657 | KCNE2 |            | 0.99 | 6.11E-02 | C | G | 0.82 (0.51 - 1.30) | 3.89 X 10 <sup>-01</sup> | 0.86 (0.59 - 1.27) | 4.53 X 10 <sup>-01</sup> |
| rs2154437  | 21 | 34573020 | KCNE2 |            | 0.99 | 6.89E-01 | C | G | 0.85 (0.57 - 1.27) | 4.29 X 10 <sup>-01</sup> | 0.93 (0.67 - 1.29) | 6.81 X 10 <sup>-01</sup> |
| rs2009879  | 21 | 34575174 | KCNE2 |            | 0.98 | 3.25E-01 | C | T | 1.03 (0.74 - 1.42) | 8.76 X 10 <sup>-01</sup> | 1.21 (0.93 - 1.57) | 1.48 X 10 <sup>-01</sup> |
| rs7277800  | 21 | 34577604 | KCNE2 |            | 0.98 | 1.36E-01 | A | G | 1.22 (0.84 - 1.76) | 2.92 X 10 <sup>-01</sup> | 1.48 (1.09 - 2.00) | 1.12 X 10 <sup>-02</sup> |

|            |    |          |       |            |      |      |          |   |   |                     |                          |                     |                          |
|------------|----|----------|-------|------------|------|------|----------|---|---|---------------------|--------------------------|---------------------|--------------------------|
| rs2834438  | 21 | 34578067 | KCNE2 |            |      | 0.97 | 1.32E-01 | A | C | 0.90 (0.63 - 1.28)  | 5.54 X 10 <sup>-01</sup> | 0.78 (0.58 - 1.04)  | 8.85 X 10 <sup>-02</sup> |
| rs7278755  | 21 | 34578250 | KCNE2 |            |      | 0.98 | 1.17E-01 | A | G | 0.90 (0.57 - 1.40)  | 6.32 X 10 <sup>-01</sup> | 0.69 (0.48 - 0.98)  | 4.04 X 10 <sup>-02</sup> |
| rs8127788  | 21 | 34580977 | KCNE2 |            |      | 0.99 | 8.84E-01 | G | T | 1.10 (0.80 - 1.52)  | 5.59 X 10 <sup>-01</sup> | 1.24 (0.96 - 1.61)  | 1.01 X 10 <sup>-01</sup> |
| rs4817639  | 21 | 34602171 | KCNE2 |            |      | 0.99 | 7.69E-01 | C | T | 1.31 (0.90 - 1.91)  | 1.64 X 10 <sup>-01</sup> | 1.63 (1.20 - 2.21)  | 1.88 X 10 <sup>-03</sup> |
| rs4817640  | 21 | 34603712 | KCNE2 |            |      | 0.98 | 8.00E-01 | C | T | 1.00 (0.70 - 1.44)  | 9.93 X 10 <sup>-01</sup> | 1.11 (0.83 - 1.49)  | 4.67 X 10 <sup>-01</sup> |
| rs1041733  | 21 | 34606130 | KCNE2 |            |      | 0.97 | 5.87E-01 | A | T | 1.10 (0.79 - 1.52)  | 5.89 X 10 <sup>-01</sup> | 1.18 (0.90 - 1.53)  | 2.24 X 10 <sup>-01</sup> |
| rs2834459  | 21 | 34634566 | KCNE2 |            |      | 0.98 | 4.60E-01 | C | T | 1.08 (0.76 - 1.53)  | 6.82 X 10 <sup>-01</sup> | 0.99 (0.74 - 1.31)  | 9.28 X 10 <sup>-01</sup> |
| rs1004951  | 21 | 34639832 | KCNE2 |            |      | 0.98 | 5.83E-01 | A | G | 1.04 (0.74 - 1.45)  | 8.40 X 10 <sup>-01</sup> | 1.17 (0.88 - 1.54)  | 2.80 X 10 <sup>-01</sup> |
| rs8128316  | 21 | 34643430 | KCNE1 |            |      | 0.98 | 7.71E-01 | C | T | 1.03 (0.75 - 1.41)  | 8.59 X 10 <sup>-01</sup> | 0.85 (0.65 - 1.10)  | 2.12 X 10 <sup>-01</sup> |
| rs4817644  | 21 | 34644865 | KCNE1 |            |      | 0.98 | 6.34E-01 | C | T | 0.93 (0.54 - 1.58)  | 7.80 X 10 <sup>-01</sup> | 0.72 (0.47 - 1.10)  | 1.31 X 10 <sup>-01</sup> |
| rs7283334  | 21 | 34647521 | KCNE1 |            |      | 0.97 | 2.34E-01 | A | G | 0.87 (0.61 - 1.23)  | 4.23 X 10 <sup>-01</sup> | 0.87 (0.65 - 1.16)  | 3.34 X 10 <sup>-01</sup> |
| rs11702479 | 21 | 34647599 | KCNE1 |            |      | 0.98 | 4.38E-01 | C | T | 1.02 (0.72 - 1.44)  | 9.23 X 10 <sup>-01</sup> | 0.92 (0.68 - 1.22)  | 5.50 X 10 <sup>-01</sup> |
| rs723548   | 21 | 34648096 | KCNE1 |            |      | 0.99 | 6.49E-01 | G | T | 0.86 (0.57 - 1.31)  | 4.95 X 10 <sup>-01</sup> | 0.98 (0.68 - 1.39)  | 8.92 X 10 <sup>-01</sup> |
| rs723547   | 21 | 34648169 | KCNE1 |            |      | 0.95 | 1.94E-01 | C | T | 0.85 (0.61 - 1.19)  | 3.42 X 10 <sup>-01</sup> | 0.94 (0.71 - 1.25)  | 6.77 X 10 <sup>-01</sup> |
| rs2834467  | 21 | 34651150 | KCNE1 | Promoter   |      | 0.99 | 8.11E-01 | A | G | 1.22 (0.86 - 1.73)  | 2.64 X 10 <sup>-01</sup> | 1.12 (0.83 - 1.51)  | 4.57 X 10 <sup>-01</sup> |
| rs13048252 | 21 | 34658036 | KCNE1 | Promoter   |      | 0.98 | 2.75E-01 | A | G | 0.98 (0.71 - 1.36)  | 9.05 X 10 <sup>-01</sup> | 0.91 (0.69 - 1.21)  | 5.24 X 10 <sup>-01</sup> |
| rs9984281  | 21 | 34663726 | KCNE1 | Intron     |      | 0.99 | 1.21E-01 | A | G | 0.93 (0.59 - 1.45)  | 7.50 X 10 <sup>-01</sup> | 0.89 (0.62 - 1.29)  | 5.47 X 10 <sup>-01</sup> |
| rs2834473  | 21 | 34695801 | KCNE1 | Intron     |      | 0.98 | 6.86E-01 | A | C | 0.95 (0.69 - 1.31)  | 7.58 X 10 <sup>-01</sup> | 0.91 (0.69 - 1.19)  | 4.89 X 10 <sup>-01</sup> |
| rs2834480  | 21 | 34714857 | KCNE1 |            |      | 0.98 | 8.33E-01 | A | C | 0.93 (0.67 - 1.30)  | 6.76 X 10 <sup>-01</sup> | 0.81 (0.61 - 1.07)  | 1.39 X 10 <sup>-01</sup> |
| rs2409520  | 21 | 34719315 | KCNE2 |            |      | 0.99 | 7.35E-01 | A | G | 1.04 (0.76 - 1.43)  | 7.87 X 10 <sup>-01</sup> | 1.01 (0.77 - 1.31)  | 9.56 X 10 <sup>-01</sup> |
| rs2834482  | 21 | 34724093 | KCNE1 |            |      | 0.97 | 8.91E-01 | C | G | 1.00 (0.70 - 1.44)  | 9.82 X 10 <sup>-01</sup> | 1.15 (0.84 - 1.56)  | 3.80 X 10 <sup>-01</sup> |
| rs9974541  | 21 | 34727874 | KCNE1 |            |      | 0.98 | 6.91E-01 | A | G | 1.05 (0.76 - 1.44)  | 7.85 X 10 <sup>-01</sup> | 0.96 (0.73 - 1.25)  | 7.42 X 10 <sup>-01</sup> |
| rs8129326  | 21 | 34734497 | KCNE1 | Downstream |      | 0.97 | 3.04E-01 | A | G | 1.01 (0.73 - 1.39)  | 9.78 X 10 <sup>-01</sup> | 1.02 (0.78 - 1.33)  | 8.77 X 10 <sup>-01</sup> |
| rs9975215  | 21 | 34736823 | KCNE1 | Downstream |      | 0.99 | 3.10E-01 | C | G | 0.87 (0.62 - 1.23)  | 4.38 X 10 <sup>-01</sup> | 0.83 (0.62 - 1.12)  | 2.21 X 10 <sup>-01</sup> |
| rs2834484  | 21 | 34738811 | KCNE2 | Downstream |      | 0.98 | 3.46E-01 | G | T | 0.88 (0.62 - 1.25)  | 4.84 X 10 <sup>-01</sup> | 1.00 (0.74 - 1.34)  | 9.90 X 10 <sup>-01</sup> |
| rs2834485  | 21 | 34740884 | KCNE1 | 3'UTR      |      | 0.98 | 9.55E-01 | A | G | 0.90 (0.64 - 1.26)  | 5.25 X 10 <sup>-01</sup> | 1.00 (0.75 - 1.33)  | 9.95 X 10 <sup>-01</sup> |
| rs2070357  | 21 | 34743289 | KCNE1 | 3'UTR      |      | 0.95 | 4.32E-02 | C | T | 0.97 (0.71 - 1.33)  | 8.49 X 10 <sup>-01</sup> | 0.99 (0.76 - 1.28)  | 9.14 X 10 <sup>-01</sup> |
| rs1805128  | 21 | 34743550 | KCNE1 | Exon       | D85N | 0.99 | 1.00E+00 | A | G | 9.92 (2.36 - 41.80) | 1.77 X 10 <sup>-03</sup> | 8.88 (3.26 - 24.17) | 1.95 X 10 <sup>-05</sup> |
| rs2070358  | 21 | 34744140 | KCNE1 | Intron     |      | 0.99 | 7.55E-01 | C | T | 0.80 (0.58 - 1.11)  | 1.85 X 10 <sup>-01</sup> | 0.96 (0.73 - 1.27)  | 7.87 X 10 <sup>-01</sup> |
| rs1547356  | 21 | 34744442 | KCNE1 | Intron     |      | 0.95 | 1.26E-01 | A | G | 0.78 (0.55 - 1.10)  | 1.56 X 10 <sup>-01</sup> | 0.91 (0.67 - 1.22)  | 5.19 X 10 <sup>-01</sup> |
| rs1547357  | 21 | 34744628 | KCNE1 | Intron     |      | 0.98 | 3.97E-01 | C | T | 1.01 (0.72 - 1.41)  | 9.60 X 10 <sup>-01</sup> | 0.97 (0.74 - 1.26)  | 8.01 X 10 <sup>-01</sup> |
| rs11088283 | 21 | 34745649 | KCNE1 | Intron     |      | 0.97 | 3.28E-01 | A | G | 0.85 (0.62 - 1.16)  | 2.98 X 10 <sup>-01</sup> | 0.94 (0.72 - 1.22)  | 6.49 X 10 <sup>-01</sup> |
| rs1012945  | 21 | 34746970 | KCNE1 | Intron     |      | 0.99 | 8.22E-01 | G | T | 0.83 (0.59 - 1.17)  | 2.93 X 10 <sup>-01</sup> | 0.85 (0.64 - 1.14)  | 2.83 X 10 <sup>-01</sup> |
| rs2070363  | 21 | 34748909 | KCNE1 | Intron     |      | 0.98 | 5.62E-01 | G | T | 1.05 (0.69 - 1.59)  | 8.20 X 10 <sup>-01</sup> | 0.93 (0.67 - 1.29)  | 6.48 X 10 <sup>-01</sup> |
| rs7275915  | 21 | 34753498 | KCNE1 | Intron     |      | 0.99 | 5.44E-01 | A | T | 0.94 (0.61 - 1.46)  | 7.79 X 10 <sup>-01</sup> | 0.71 (0.49 - 1.03)  | 6.78 X 10 <sup>-02</sup> |
| rs1007293  | 21 | 34758568 | KCNE1 | Intron     |      | 0.97 | 9.04E-01 | A | G | 0.97 (0.68 - 1.39)  | 8.73 X 10 <sup>-01</sup> | 1.00 (0.75 - 1.33)  | 9.87 X 10 <sup>-01</sup> |
| rs2247810  | 21 | 34761269 | KCNE1 | Intron     |      | 0.97 | 2.49E-02 | C | T | 0.93 (0.66 - 1.32)  | 6.92 X 10 <sup>-01</sup> | 1.07 (0.81 - 1.41)  | 6.27 X 10 <sup>-01</sup> |
| rs4817658  | 21 | 34769084 | KCNE1 | Intron     |      | 0.97 | 3.67E-01 | A | G | 0.89 (0.64 - 1.25)  | 5.16 X 10 <sup>-01</sup> | 1.14 (0.87 - 1.50)  | 3.28 X 10 <sup>-01</sup> |
| rs6517232  | 21 | 34772172 | KCNE1 | Intron     |      | 0.98 | 6.77E-01 | A | G | 1.18 (0.84 - 1.66)  | 3.50 X 10 <sup>-01</sup> | 0.94 (0.72 - 1.24)  | 6.75 X 10 <sup>-01</sup> |
| rs2834489  | 21 | 34775046 | KCNE1 | Intron     |      | 0.97 | 6.88E-01 | C | T | 0.81 (0.57 - 1.15)  | 2.46 X 10 <sup>-01</sup> | 1.01 (0.76 - 1.34)  | 9.51 X 10 <sup>-01</sup> |
| rs2051391  | 21 | 34798308 | KCNE1 | Intron     |      | 0.99 | 9.36E-01 | C | T | 0.78 (0.53 - 1.15)  | 2.12 X 10 <sup>-01</sup> | 1.04 (0.76 - 1.44)  | 8.07 X 10 <sup>-01</sup> |
| rs2834501  | 21 | 34804955 | KCNE1 | Downstream |      | 0.98 | 1.77E-01 | A | G | 0.87 (0.60 - 1.26)  | 4.52 X 10 <sup>-01</sup> | 0.95 (0.69 - 1.31)  | 7.65 X 10 <sup>-01</sup> |
| rs11702354 | 21 | 34806395 | KCNE1 | Downstream |      | 0.99 | 6.06E-01 | A | G | 0.87 (0.60 - 1.26)  | 4.72 X 10 <sup>-01</sup> | 0.93 (0.68 - 1.27)  | 6.47 X 10 <sup>-01</sup> |
| rs13051296 | 21 | 34809970 | KCNE1 | Downstream |      | 0.98 | 1.10E-01 | C | G | 0.92 (0.64 - 1.31)  | 6.26 X 10 <sup>-01</sup> | 0.99 (0.74 - 1.34)  | 9.68 X 10 <sup>-01</sup> |
| rs2834503  | 21 | 34814634 | KCNE1 | Intron     |      | 0.97 | 7.51E-01 | C | G | 0.96 (0.69 - 1.33)  | 7.89 X 10 <sup>-01</sup> | 1.14 (0.87 - 1.49)  | 3.57 X 10 <sup>-01</sup> |
| rs11700452 | 21 | 34815512 | KCNE1 | Intron     |      | 0.97 | 6.64E-01 | A | G | 0.84 (0.55 - 1.29)  | 4.19 X 10 <sup>-01</sup> | 1.16 (0.81 - 1.67)  | 4.25 X 10 <sup>-01</sup> |
| rs1012599  | 21 | 34817502 | KCNE1 | Intron     |      | 0.99 | 1.00E+00 | A | G | 1.14 (0.82 - 1.59)  | 4.43 X 10 <sup>-01</sup> | 0.82 (0.63 - 1.06)  | 1.26 X 10 <sup>-01</sup> |
| rs6517239  | 21 | 34817902 | KCNE1 | Intron     |      | 0.97 | 3.89E-01 | A | G | 0.80 (0.53 - 1.20)  | 2.79 X 10 <sup>-01</sup> | 1.09 (0.78 - 1.53)  | 6.11 X 10 <sup>-01</sup> |
| rs2243890  | 21 | 34822629 | KCNE1 | Promoter   |      | 0.98 | 9.18E-01 | A | G | 0.98 (0.69 - 1.38)  | 8.97 X 10 <sup>-01</sup> | 0.87 (0.67 - 1.13)  | 3.05 X 10 <sup>-01</sup> |
| rs2243982  | 21 | 34823160 | KCNE1 | Promoter   |      | 0.97 | 3.54E-01 | A | G | 0.93 (0.67 - 1.30)  | 6.71 X 10 <sup>-01</sup> | 1.01 (0.77 - 1.31)  | 9.68 X 10 <sup>-01</sup> |
| rs3787719  | 21 | 34825700 | KCNE1 | Promoter   |      | 0.99 | 4.89E-01 | A | T | 1.00 (0.69 - 1.47)  | 9.87 X 10 <sup>-01</sup> | 1.09 (0.79 - 1.50)  | 6.07 X 10 <sup>-01</sup> |
| rs7280739  | 21 | 34826567 | KCNE1 | Promoter   |      | 0.99 | 7.01E-01 | A | C | 1.07 (0.73 - 1.57)  | 7.35 X 10 <sup>-01</sup> | 1.11 (0.80 - 1.53)  | 5.34 X 10 <sup>-01</sup> |
| rs2834506  | 21 | 34829283 | KCNE1 | Promoter   |      | 0.98 | 3.52E-01 | A | G | 0.82 (0.58 - 1.16)  | 2.56 X 10 <sup>-01</sup> | 1.02 (0.77 - 1.35)  | 8.95 X 10 <sup>-01</sup> |
| rs2834512  | 21 | 34833469 | KCNE1 | Intron     |      | 0.99 | 5.42E-01 | A | G | 0.93 (0.58 - 1.48)  | 7.51 X 10 <sup>-01</sup> | 1.08 (0.75 - 1.57)  | 6.73 X 10 <sup>-01</sup> |
| rs2834523  | 21 | 34841438 | KCNE1 | Intron     |      | 0.98 | 9.36E-01 | A | C | 0.90 (0.60 - 1.35)  | 6.15 X 10 <sup>-01</sup> | 1.13 (0.81 - 1.58)  | 4.74 X 10 <sup>-01</sup> |
| rs8129311  | 21 | 34843876 | KCNE1 | Intron     |      | 0.98 | 5.74E-01 | C | T | 1.01 (0.69 - 1.49)  | 9.51 X 10 <sup>-01</sup> | 1.25 (0.92 - 1.70)  | 1.59 X 10 <sup>-01</sup> |
| rs2247884  | 21 | 34845996 | KCNE1 | Intron     |      | 0.98 | 9.07E-01 | A | G | 1.12 (0.79 - 1.61)  | 5.25 X 10 <sup>-01</sup> | 0.80 (0.60 - 1.06)  | 1.19 X 10 <sup>-01</sup> |
| rs2834536  | 21 | 34851062 | KCNE1 | Intron     |      | 0.98 | 6.96E-01 | C | T | 0.91 (0.66 - 1.26)  | 5.75 X 10 <sup>-01</sup> | 1.19 (0.92 - 1.55)  | 1.79 X 10 <sup>-01</sup> |
| rs2834540  | 21 | 34853204 | KCNE1 | Intron     |      | 0.95 | 5.85E-05 | C | T | 1.27 (0.91 - 1.76)  | 1.65 X 10 <sup>-01</sup> | 0.80 (0.62 - 1.04)  | 9.77 X 10 <sup>-02</sup> |
| rs2834541  | 21 | 34854489 | KCNE1 | Intron     |      | 0.98 | 4.11E-01 | A | C | 0.93 (0.65 - 1.33)  | 6.75 X 10 <sup>-01</sup> | 1.11 (0.82 - 1.49)  | 5.04 X 10 <sup>-01</sup> |
| rs13050712 | 21 | 34860476 | KCNE1 | Intron     |      | 0.99 | 5.46E-01 | C | T | 1.92 (0.89 - 4.10)  | 9.50 X 10 <sup>-02</sup> | 0.91 (0.54 - 1.54)  | 7.22 X 10 <sup>-01</sup> |
| rs1984305  | 21 | 34861283 | KCNE1 | Intron     |      | 0.98 | 2.33E-01 | C | T | 1.32 (0.95 - 1.82)  | 9.74 X 10 <sup>-02</sup> | 0.91 (0.70 - 1.19)  | 5.01 X 10 <sup>-01</sup> |
| rs2252721  | 21 | 34863639 | KCNE1 | Intron     |      | 0.97 | 2.37E-01 | C | T | 1.18 (0.85 - 1.63)  | 3.17 X 10 <sup>-01</sup> | 1.32 (1.01 - 1.73)  | 3.90 X 10 <sup>-02</sup> |
| rs2409525  | 21 | 34863797 | KCNE1 | Intron     |      | 0.98 | 2.02E-01 | A | C | 1.17 (0.84 - 1.63)  | 3.64 X 10 <sup>-01</sup> | 1.40 (1.07 - 1.83)  | 1.58 X 10 <sup>-02</sup> |

|           |    |          |       |          |      |          |   |   |                    |                          |                    |                          |
|-----------|----|----------|-------|----------|------|----------|---|---|--------------------|--------------------------|--------------------|--------------------------|
| rs715157  | 21 | 34869845 | KCNE1 | Intron   | 0.98 | 1.60E-02 | A | C | 0.91 (0.66 - 1.26) | 5.65 X 10 <sup>-01</sup> | 0.72 (0.55 - 0.93) | 1.27 X 10 <sup>-02</sup> |
| rs1573465 | 21 | 34871068 | KCNE1 | Intron   | 0.97 | 1.02E-02 | C | T | 0.89 (0.63 - 1.26) | 5.09 X 10 <sup>-01</sup> | 0.76 (0.58 - 0.99) | 4.45 X 10 <sup>-02</sup> |
| rs2256666 | 21 | 34872743 | KCNE1 | Intron   | 0.97 | 2.69E-01 | C | G | 0.99 (0.71 - 1.38) | 9.63 X 10 <sup>-01</sup> | 0.77 (0.59 - 1.00) | 5.31 X 10 <sup>-02</sup> |
| rs2300386 | 21 | 34878910 | KCNE1 | Intron   | 0.95 | 3.76E-01 | C | T | 0.77 (0.53 - 1.13) | 1.87 X 10 <sup>-01</sup> | 0.99 (0.72 - 1.36) | 9.33 X 10 <sup>-01</sup> |
| rs9983381 | 21 | 34880457 | KCNE1 | Intron   | 0.98 | 6.13E-01 | C | T | 0.76 (0.52 - 1.12) | 1.65 X 10 <sup>-01</sup> | 0.99 (0.72 - 1.35) | 9.32 X 10 <sup>-01</sup> |
| rs2268267 | 21 | 34888426 | KCNE1 | Intron   | 0.97 | 4.13E-01 | C | T | 0.86 (0.61 - 1.22) | 4.03 X 10 <sup>-01</sup> | 1.06 (0.80 - 1.41) | 6.69 X 10 <sup>-01</sup> |
| rs2300391 | 21 | 34891770 | KCNE1 | Intron   | 0.98 | 2.85E-01 | A | G | 0.97 (0.68 - 1.38) | 8.59 X 10 <sup>-01</sup> | 1.02 (0.76 - 1.37) | 8.86 X 10 <sup>-01</sup> |
| rs2250442 | 21 | 34892482 | KCNE1 | Intron   | 0.98 | 3.86E-01 | C | G | 1.16 (0.82 - 1.64) | 4.15 X 10 <sup>-01</sup> | 1.32 (1.00 - 1.75) | 5.21 X 10 <sup>-02</sup> |
| rs2284605 | 21 | 34893163 | KCNE1 | Intron   | 0.99 | 2.38E-01 | A | C | 0.87 (0.63 - 1.20) | 3.99 X 10 <sup>-01</sup> | 0.74 (0.57 - 0.96) | 2.58 X 10 <sup>-02</sup> |
| rs743302  | 21 | 34897340 | KCNE1 | Intron   | 0.95 | 5.57E-02 | A | G | 1.22 (0.87 - 1.71) | 2.47 X 10 <sup>-01</sup> | 1.33 (1.02 - 1.74) | 3.87 X 10 <sup>-02</sup> |
| rs6517246 | 21 | 34918012 | KCNE1 | Promoter | 0.97 | 2.35E-01 | C | G | 1.08 (0.69 - 1.68) | 7.44 X 10 <sup>-01</sup> | 0.83 (0.59 - 1.16) | 2.76 X 10 <sup>-01</sup> |
| rs4817686 | 21 | 34922671 | KCNE1 |          | 0.98 | 1.19E-01 | A | T | 0.90 (0.61 - 1.33) | 6.06 X 10 <sup>-01</sup> | 0.85 (0.62 - 1.18) | 3.29 X 10 <sup>-01</sup> |
| rs2834549 | 21 | 34926409 | KCNE1 |          | 0.98 | 7.71E-01 | A | G | 0.90 (0.65 - 1.25) | 5.34 X 10 <sup>-01</sup> | 0.86 (0.67 - 1.11) | 2.52 X 10 <sup>-01</sup> |

## Supplemental Figure

A

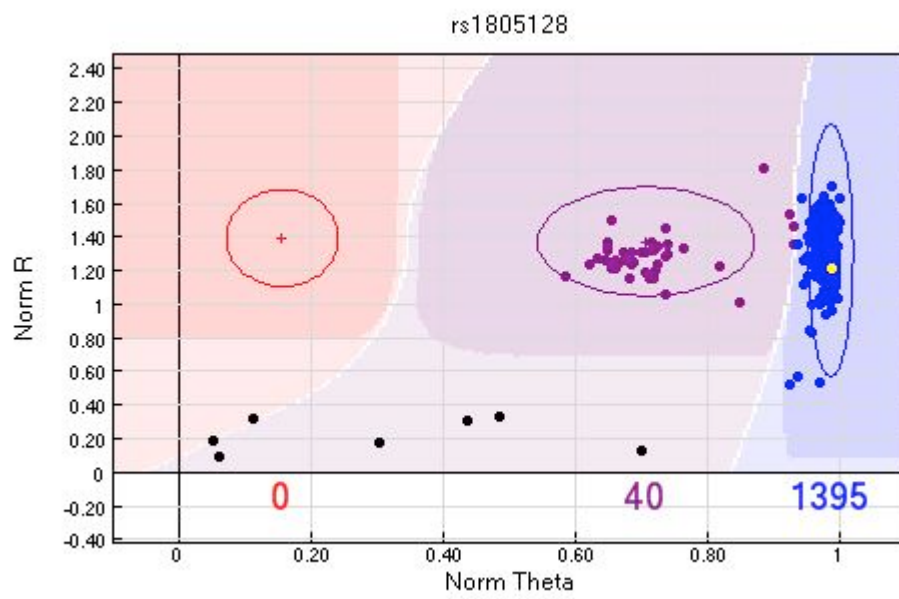

B

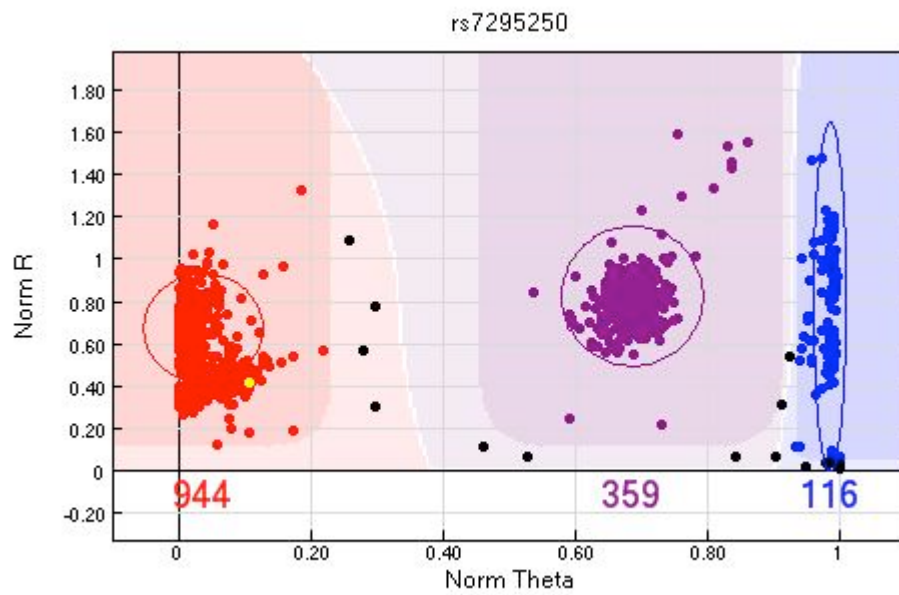

Panels A and B show the Illumina Bead Studio Cluster Plots for rs1805128 and rs7295250, which were selected for replication analysis.
